# Supplementary material for: Cohort profile: genomic data for 26 622 individuals from the Canadian Longitudinal Study on Aging (CLSA)
Source: PubMed Central journal article supplement — BMJ Open. 2022 Mar 10;12(3):e059021. doi: 10.1136/bmjopen-2021-059021 (PMC8915305; doi:10.1136/bmjopen-2021-059021), 2022-03-10
Supplement: bmjopen-2021-059021.draft_revisions.pdf [file bmjopen-2021-059021.draft_revisions.pdf]

# BMJ Open

BMJ Open is committed to open peer review. As part of this commitment we make the peer review history of every article we publish publicly available.

When an article is published we post the peer reviewers' comments and the authors' responses online. We also post the versions of the paper that were used during peer review. These are the versions that the peer review comments apply to.

The versions of the paper that follow are the versions that were submitted during the peer review process. They are not the versions of record or the final published versions. They should not be cited or distributed as the published version of this manuscript.

BMJ Open is an open access journal and the full, final, typeset and author-corrected version of record of the manuscript is available on our site with no access controls, subscription charges or pay-per-view fees (<http://bmjopen.bmj.com>).

If you have any questions on BMJ Open's open peer review process please email [info.bmjopen@bmj.com](mailto:info.bmjopen@bmj.com)

# BMJ Open

## Cohort Profile: Genomic Data for 26,622 Individuals from the Canadian Longitudinal Study on Aging (CLSA)

|                               |                                                                                                                                                                                                                                                                                                                                                                                                                                                                                                                                                                                                                                                                                                                                                                                                                                                                                                                                                                                                                                                                                                                                                                                                                                                    |
|-------------------------------|----------------------------------------------------------------------------------------------------------------------------------------------------------------------------------------------------------------------------------------------------------------------------------------------------------------------------------------------------------------------------------------------------------------------------------------------------------------------------------------------------------------------------------------------------------------------------------------------------------------------------------------------------------------------------------------------------------------------------------------------------------------------------------------------------------------------------------------------------------------------------------------------------------------------------------------------------------------------------------------------------------------------------------------------------------------------------------------------------------------------------------------------------------------------------------------------------------------------------------------------------|
| Journal:                      | <i>BMJ Open</i>                                                                                                                                                                                                                                                                                                                                                                                                                                                                                                                                                                                                                                                                                                                                                                                                                                                                                                                                                                                                                                                                                                                                                                                                                                    |
| Manuscript ID                 | bmjopen-2021-059021                                                                                                                                                                                                                                                                                                                                                                                                                                                                                                                                                                                                                                                                                                                                                                                                                                                                                                                                                                                                                                                                                                                                                                                                                                |
| Article Type:                 | Cohort profile                                                                                                                                                                                                                                                                                                                                                                                                                                                                                                                                                                                                                                                                                                                                                                                                                                                                                                                                                                                                                                                                                                                                                                                                                                     |
| Date Submitted by the Author: | 05-Nov-2021                                                                                                                                                                                                                                                                                                                                                                                                                                                                                                                                                                                                                                                                                                                                                                                                                                                                                                                                                                                                                                                                                                                                                                                                                                        |
| Complete List of Authors:     | <p>Forgetta, Vince; Jewish General Hospital, Centre for Clinical Epidemiology<br/>         Li, Rui; McGill University,<br/>         Darmond-Zwaig, Corinne; McGill University<br/>         Belisle, Alexandre; McGill University<br/>         Balion, Cynthia; McMaster University, Pathology and Molecular Medicine<br/>         Roshandel, Delnaz; The Hospital for Sick Children, Peter Gilgan Centre for Research and Learning<br/>         Wolfson, Christina; McGill University<br/>         Lettre, Guillaume; Université de Montréal; Montreal Heart Institute<br/>         Pare, Guillaume ; McMaster University<br/>         Paterson, Andrew; Hospital for Sick Children,<br/>         Griffith, Lauren; McMaster University, Department of Health Research Methods, Evidence, and Impact<br/>         Verschoor, Chris; McMaster University,<br/>         Lathrop, Mark; McGill University, Department of Human Genetics<br/>         Kirkland, Susan ; Dalhousie University,<br/>         Raina, Parminder; McMaster University, Clinical Epidemiology and Biostatistics<br/>         Richards, Brent ; McGill University,<br/>         Ragoussis, Jiannis; McGill University, Department of Human Genetics; McGill Genome Centre</p> |
| Keywords:                     | GENETICS, EPIDEMIOLOGY, PUBLIC HEALTH, Risk management < HEALTH SERVICES ADMINISTRATION & MANAGEMENT, Health informatics < BIOTECHNOLOGY & BIOINFORMATICS, SLEEP MEDICINE                                                                                                                                                                                                                                                                                                                                                                                                                                                                                                                                                                                                                                                                                                                                                                                                                                                                                                                                                                                                                                                                          |
|                               |                                                                                                                                                                                                                                                                                                                                                                                                                                                                                                                                                                                                                                                                                                                                                                                                                                                                                                                                                                                                                                                                                                                                                                                                                                                    |

SCHOLARONE™  
Manuscripts

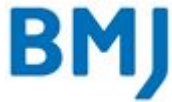

I, the Submitting Author has the right to grant and does grant on behalf of all authors of the Work (as defined in the below author licence), an exclusive licence and/or a non-exclusive licence for contributions from authors who are: i) UK Crown employees; ii) where BMJ has agreed a CC-BY licence shall apply, and/or iii) in accordance with the terms applicable for US Federal Government officers or employees acting as part of their official duties; on a worldwide, perpetual, irrevocable, royalty-free basis to BMJ Publishing Group Ltd ("BMJ") its licensees and where the relevant Journal is co-owned by BMJ to the co-owners of the Journal, to publish the Work in this journal and any other BMJ products and to exploit all rights, as set out in our [licence](#).

The Submitting Author accepts and understands that any supply made under these terms is made by BMJ to the Submitting Author unless you are acting as an employee on behalf of your employer or a postgraduate student of an affiliated institution which is paying any applicable article publishing charge ("APC") for Open Access articles. Where the Submitting Author wishes to make the Work available on an Open Access basis (and intends to pay the relevant APC), the terms of reuse of such Open Access shall be governed by a Creative Commons licence – details of these licences and which [Creative Commons](#) licence will apply to this Work are set out in our licence referred to above.

Other than as permitted in any relevant BMJ Author's Self Archiving Policies, I confirm this Work has not been accepted for publication elsewhere, is not being considered for publication elsewhere and does not duplicate material already published. I confirm all authors consent to publication of this Work and authorise the granting of this licence.

1  
2  
3 **Title:** Cohort Profile: Genomic Data for 26,622 Individuals from the Canadian Longitudinal Study  
4  
5 on Aging (CLSA)  
6  
7

8  
9 **Author List:**

10 Vincenzo Forgetta<sup>1†</sup>, Rui Li<sup>2†</sup>, Corinne Darmond-Zwaig<sup>2</sup>, Alexandre Belisle<sup>2</sup>, Cynthia Balion<sup>3</sup>,

11  
12 Delnaz Roshandel<sup>4</sup>, Christina Wolfson<sup>5</sup>, Guillaume Lettre<sup>6</sup>, Guillaume Pare<sup>3</sup>, Andrew D.

13  
14 Paterson<sup>4,7,8</sup>, Lauren E. Griffith<sup>9</sup>, Chris Verschoor<sup>9</sup>, Mark Lathrop<sup>2</sup>, Susan Kirkland<sup>10</sup>, Parminder

15  
16 Raina<sup>9‡</sup>, J. Brent Richards<sup>1,5,11,12‡</sup>, and Jiannis Ragoussis<sup>2,12,13‡</sup>  
17

18  
19 1 Centre for Clinical Epidemiology, Lady Davis Institute, Jewish General Hospital, Montréal, QC,  
20  
21 Canada,  
22

23  
24 2 McGill University Genome Centre, Department of Human Genetics, McGill University,  
25  
26 Montréal, QC, Canada,  
27

28  
29 3 Hamilton Regional Laboratory Medicine Program, McMaster University, St. Joseph's Hospital  
30  
31 St. Lukes Wing, Hamilton, ON, Canada,  
32

33  
34 4 Genetics & Genomic Biology, The Hospital for Sick Children Research Institute, The Hospital  
35  
36 for Sick Children, Toronto, ON, Canada,  
37

38  
39 5 Department of Medicine, & of Epidemiology and Biostatistics and Occupational Health, McGill  
40  
41 University, Montréal, QC, Canada,  
42

43  
44 6 Montréal Heart Institute and Université de Montréal, Montréal, QC, Canada,  
45

46  
47 7 Dalla Lana School of Public Health, University of Toronto, Toronto, ON, Canada,  
48

49  
50 8 <https://orcid.org/0000-0002-9169-118X>  
51

52  
53 9 Department of Health Research Methods, Evidence, and Impact, McMaster University,  
54  
55 Hamilton, ON, Canada,  
56

57  
58 10 Department of Community Health and Epidemiology, Division of Geriatric Medicine,  
59  
60 Dalhousie University, Halifax, Nova Scotia, Canada,

1  
2  
3 11 Department of Twin Research and Genetic Epidemiology, King's College London, London,  
4  
5 UK,

6  
7 12 Department of Human Genetics, McGill University, Montréal, QC, Canada,

8  
9 13 Department of Bioengineering, McGill University, Montréal, QC, Canada,

10  
11 \* Corresponding author. McGill Genome Centre, 740 Avenue Dr. Penfield, Montreal, Québec,  
12  
13 Canada H3A 0G1. Email: [ioannis.ragoussis@mcgill.ca](mailto:ioannis.ragoussis@mcgill.ca).

14  
15 † Joint first authors.

16  
17 ‡ Joint senior authors.

18  
19  
20  
21  
22 **Keyword:** CLSA, genome-wide genotyping, aging, HLA

23  
24 **Word count:** 4,102

## 25 26 27 28 **Abstract**

29  
30 **Purpose:** The Canadian Longitudinal Study on Aging (CLSA) Comprehensive cohort was  
31  
32 established to provide unique opportunities in studying the genetic and environmental  
33  
34 contributions to human health and disease in aging process. The aim of this study is to describe  
35  
36 the genomic data included in CLSA.

37  
38 **Participants:** A total of 26,622 individuals from CLSA baseline data collection on 51,338 men  
39  
40 and women aged 45 to 85 recruited between 2010 and 2015 have undergone genome-wide  
41  
42 genotyping of DNA samples collected from blood. Comprehensive quality control metrics were  
43  
44 measured on genetic marker and sample-wise respectively. The genotypes were imputed to the  
45  
46 TopMed reference panel. Sex chromosome abnormalities were identified by copy number  
47  
48 profiling. The genotypes were imputed for classical HLA genes at two-field (four-digit).

49  
50 **Findings to date:** Of the 26,622 genotyped participants, 24,655 (92.6%) were identified as  
51  
52 having European ancestry. This genomic data can be linked to physical, lifestyle, medical,  
53  
54 economic, environmental, and psychosocial factors collected longitudinally in CLSA. CLSA  
55  
56  
57  
58  
59  
60

1  
2  
3 genomic dataset has been used as a validation cohort to test the contribution of polygenic risk  
4 score to screen individuals with high fracture risk. It is also a valuable resource to directly  
5 identify common genetic variation associated with conditions related to complex traits. One  
6 study has employed CLSA genomic data in a large-scale GWAS and identified novel variants  
7 associated with sleep apnoea. Taking advantage of the comprehensive interview and physical  
8 information collected in CLSA, this genomic dataset has been linked to psychosocial factors to  
9 investigate both the independent and interactive effects on cardiovascular disease.  
10  
11  
12  
13  
14  
15  
16  
17

18 **Future plans:** The DNA methylation, metabolomic and proteomic data are being generated.  
19 Ongoing studies focus on elucidating the role of genetic factors in cognitive decline and  
20 cardiovascular diseases. This genomic data resource is available upon request through CLSA  
21 data access application process.  
22  
23  
24  
25  
26  
27

### 28 **Strengths and limitations of this study**

- 29  
30 • The genomic data in Canadian Longitudinal Study on Aging (CLSA) Comprehensive  
31 cohort provides whole-genome genotyping data on 794,409 markers and whole-genome  
32 imputed data on approximately 308 million genetic variants.  
33  
34
- 35 • The UK Biobank array used for genotyping is enriched with known markers associated  
36 with multiple phenotypes. The comprehensive pharmacogenomic and inflammation  
37 markers may be of particular interest since DNA methylation, metabolomic and  
38 proteomic data are being generated by CLSA.  
39  
40
- 41 • The CLSA cohort has completed the baseline sample collection. It continues to follow up  
42 the participants on a wide spectrum of qualitative and quantitative variables. This  
43 facilitates the research on the effect of interplay between genetics and environmental  
44 factors on age-related diseases.  
45  
46
- 47 • Potential limitations may include the relatively lower genotyping coverage in participants  
48 with non-European ancestry and inadequate power to discover very rare predisposition  
49  
50  
51  
52  
53  
54  
55  
56  
57  
58  
59  
60

1  
2  
3 variants. Such limitations associated with this type of data can be overcome by  
4  
5 imputation and meta-analysis.  
6  
7  
8

## 9 **Introduction**

10  
11 The global life expectancy increased dramatically through the past two hundred years. In such  
12  
13 times, the make-up of Canadian population has changed unprecedentedly. From 1977 to 2017,  
14  
15 the senior population, i.e., people aged 65 and older, grew from 2 million to 6.2 million, which  
16  
17 equaled to nearly 17% of its population size. However, this number is still rapidly rising. It is  
18  
19 anticipated that by 2036 there will be 10.2 million senior people in Canada. In another word, in  
20  
21 every 4 Canadians, there will be one senior person.  
22  
23

24 Along with the expanded human life expectancy, the prevalence of age-related diseases is  
25  
26 strikingly increasing. Aged people experience progressive decline in functional integrity and  
27  
28 homeostasis. This process is accompanied by increased risk of neurodegeneration,  
29  
30 cardiovascular disease and cancer among many other diseases, which have become the most  
31  
32 common causes of decreased life quality and late-life mortality. It adds substantial burden to  
33  
34 individual and social health care system inadvertently. Age-related diseases have highly  
35  
36 complex nature. Both the genetic and environmental factors play an important role as well as  
37  
38 the interaction between them. Therefore, understanding of the underlying mechanisms of aging  
39  
40 is highly in demand for sustaining longer lives with reduced loss of healthy years.  
41  
42

43 Studies on short-lived model organisms provided insights on several key genetical regulators in  
44  
45 hallmark aging pathways, however, the identification of biomarkers of age and age-related  
46  
47 disease in human is more complicated <sup>1</sup>. Over the past decade, genetic epidemiology methods  
48  
49 emerged to be a powerful tool. The genome-wide association studies (GWAS) uncovered tens  
50  
51 of genes and genetic variations that may dominate the variability of aging outcomes among  
52  
53 people <sup>2</sup>. They shed light on multi-trait variants associated with diseases. However, the genetic  
54  
55 effects are usually relatively moderate and altered by lifestyle and other environmental  
56  
57  
58  
59  
60

1  
2  
3 determinants. More work is needed to fully deconvolute the interplay between genetics and  
4  
5 extrinsic influences. This effort will be benefited by larger sample size and linked information on  
6  
7 proteomics and epigenetics.  
8  
9

### 10 11 **Cohort description**

12  
13 The Canadian Longitudinal Study on Aging (CLSA) is a national long-term study that recruited  
14  
15 51,338 men and women, aged 45-85 years at enrolment between 2010 and 2015 for baseline  
16  
17 data collection <sup>3</sup>. It presents a unique opportunity to study genetic and environmental  
18  
19 contributions to human health and disease by providing information on the changing biological,  
20  
21 medical, psychological, social, lifestyle and economic aspects of participants' lives. It is  
22  
23 composed of two complementary cohorts: the Tracking cohort of 21,241 participants who are  
24  
25 interviewed by telephone and the Comprehensive cohort of 30,097 participants who are  
26  
27 interviewed in person and provide blood and urine samples. The participants in the  
28  
29 Comprehensive cohort were randomly selected from within 25-50 km of 11 data collection sites  
30  
31 in seven provinces. A total of 27,170 (90.3%) Comprehensive cohort participants provided blood  
32  
33 samples at baseline. The Comprehensive Cohort samples have been used to produce whole  
34  
35 genome genotyping data. The data were collected to understand, individually and in  
36  
37 combination, the impact of genetic variation in both maintaining health and in the development  
38  
39 of disease and disability as people age. In this release of the CLSA genomic data, 26,622  
40  
41 participants have been genotyped using the Affymetrix UK Biobank Axiom array <sup>4</sup>. Qualified  
42  
43 researchers from any country can access these genomic and phenotypic data via a formal data  
44  
45 and sample access procedure described on the CLSA Data Preview Portal.  
46  
47  
48

### 49 ***Patient and public involvement***

50  
51 Patients or public were not involved in the development of the research question and study  
52  
53 design or conducting the present study.  
54  
55  
56  
57  
58  
59  
60



**Data collected:*****Sample storage and DNA extraction***

The CLSA protocol was reviewed and approved by 13 research ethics boards across Canada. All participants provided written informed consent<sup>5</sup>. The biological samples were collected at the Data Collection Site and de-identified. Whole blood buffy coats were isolated from peripheral blood drawn and the plasma layer was removed. Samples were immediately moved to -80°C storage, and transferred to LN<sub>2</sub> storage at the CLSA Biorepository and Bioanalysis Centre up to one week later until shipment to the genomics facility, after which they were stored at -20°C. The time from blood collection to -80°C storage was under two hours for all participants. Genomic DNA was extracted from blood samples using the purification protocol “Chemagic DNA Buffy Coat Kit special 200µl prefilling VD151007” on the Chemagic MSM I instrument (Perkin-Elmer article No. CMG-533). All extracted samples were quantified using PicoGreen Reagent Kit (Life Technologies, catalog # P7589). A minimum concentration for passing of samples was set at 10 ng/µl. Samples were subsequently normalized to 20 ng/µl, except for those with a concentration of 10-20 ng/µl, which were used undiluted.

***Genotyping and calling***

Each plate genotyped contained 92 CLSA DNA samples and 4 controls, one male control as the Affymetrix Reference Genomic DNA 103 (Catalog# 900421) or Personal Genome Project sample huAA53E0 (Coriell Cell Repositories, catalog # NA24385), two female controls as the CEPH control 1463-02 (Coriell Cell Repositories, catalog # NA12878) or the CEPH control 1347-2 (Coriell Cell Repositories, catalog # NA10859), and a deionized water negative control. The Affymetrix protocol (Axiom 2.0 Assay Automated workflow on Affymetrix NIMBUS) was followed. Samples were hybridized to UK Biobank arrays (ThermoFisher Catalog #902502), the same array that was used to genotype ~450,000 individuals in the UK Biobank cohort<sup>6</sup>. Axiom Array plates were processed on the Affymetrix GeneTitan Multi-Channel Instrument. For first pass quality control (QC), batches of 8 plates were analyzed using the Sample QC workflow

1  
2  
3 of the Axiom<sup>TM</sup> Analysis Suite 2.0 software where a subset of 20,000 reliable probes were used  
4  
5 to determine Dish QC (the measure of the resolution of the AT and GC signal contrast) and  
6  
7 sample QC. The reliable probes are autosomal, previously wet-lab tested, working probe sets  
8  
9 with two array features per probe set.  
10

### 11 ***Genotyping quality control and removal of duplicate genotyped participants***

12  
13 Genotyping was undertaken in separate batches of approximately 5,000 samples each using  
14  
15 Axiom<sup>TM</sup> Analysis Suite 2.0, similar to UK Biobank genotyping QC documentation <sup>4</sup>. Genotype  
16  
17 calling resulted in 27,010 successfully genotyped DNA samples. An inclusion list containing  
18  
19 794,409 genetic variants was used <sup>6</sup>, as well as the following QC parameters for selecting  
20  
21 samples passing to further analysis: Dish QC  $\geq 0.82$  on sample level, and average QC call rate  
22  
23 of passing samples on a plate (plate QC call rate)  $\geq 95\%$ , percentage of passing samples  $\geq$   
24  
25 70%, and average call rate for passing samples  $\geq 95\%$  on plate-level. Duplicate genotyped  
26  
27 participants were detected by KING version 2.1.3 <sup>7</sup> and the sample with higher genotype  
28  
29 missingness was removed. This resulted in 26,622 successfully genotyped participants.  
30  
31

### 32 ***Sex chromosome composition***

33  
34 Distribution of F estimates on the X chromosome showed a gap between 0.4 and 0.8  
35  
36 (Supplementary Figure S1). Using this threshold, we obtained X chromosome number using  
37  
38 PLINK version 1.90b4.4 <sup>8,9</sup>. F estimates for the 48 individuals with sex discrepancies between  
39  
40 self-reported sex and X chromosome composition (Table 1) are listed in Supplementary Table  
41  
42 S1. All subsequent analyses in this paper will use X chromosome number to define sex.  
43  
44  
45  
46  
47

### 48 ***Genetic marker-based quality control***

49  
50 This consisted of 4 tests intended to check for consistency of markers across various  
51  
52 experimental factors, such as genotyping batch, participant sex, Hardy-Weinberg equilibrium  
53  
54 (HWE), and discordance of genotyping across control replicates.  
55  
56  
57  
58  
59  
60

1  
2  
3 The above tests require a population with relatively homogenous ancestry. Given this, we  
4 determined the largest subset of ancestrally homogeneous participants via K-means clustering  
5 of projected principal components from 414 individuals across 4 populations (Utah Residents  
6 (CEPH) with Northern and Western European Ancestry (CEU), Han Chinese in Beijing, China  
7 (CHB), Japanese in Tokyo, Japan (JPT) and Yoruba in Ibadan, Nigeria (YRI)) from 1000  
8 Genomes Phase 3. The largest cluster across all genotype batches overlapped the CEU  
9 population, and included a total of 24,361 individuals, or 92% of the entire genotyped cohort  
10 (N=26,622) (Supplementary Figure S2).

11  
12  
13  
14  
15  
16  
17  
18  
19  
20  
21  
22 We then determined a multiple-testing corrected p-value threshold for quality control tests as  
23  $3.15 \times 10^{-10}$ . For the 794,409 markers and 5 batches, this p-value cut-off can be considered as  
24 a family-wise error rate of 0.001 for each test. Since many tests may be positively correlated,  
25 the threshold is conservative and will identify markers with strong evidence of deviation from the  
26 null hypothesis. Single nucleotide polymorphisms (SNPs) that failed the tested QC parameters  
27 are flagged within the marker quality table provided with the data release. We thus invite  
28 researchers to filter markers based on these properties or devise their own quality control  
29 metrics that satisfy their research requirements.

#### 30 31 32 33 34 35 36 37 38 39 *Discordant genotype frequency between batches*

40  
41 To detect deviation in genotype frequency of markers between batches, we used a Fisher's  
42 exact test on the 2x3 table of genotype counts (or 2x2 table for haploid markers). The vast  
43 majority of markers did not exhibit significant deviation in genotype frequency (779,656, 98.1%  
44 of total).

#### 45 46 47 48 49 *Departure from Hardy-Weinberg equilibrium*

50  
51 We conducted the test for departure from HWE using the exact test<sup>10</sup>. There were 7,790  
52 markers with an HWE p-value  $< 3.5 \times 10^{-10}$ .

#### 53 54 55 56 57 58 59 *Discordance across control replicates*

1  
2  
3 There were 3 positive control samples on each genotyping plate: a male control (Affymetrix  
4 CTL1 103 or Personal Genome Project participant huAA53E0), and one of two female controls  
5 (CEPH 1463-02 or CEPH 1347-02) in duplicate. For each marker and control sample we  
6  
7 computed a discordance metric ( $d$ ) defined as below:  
8  
9

$$d = 1 - \frac{\max(n_{aa}, n_{ab}, n_{bb})}{n_{aa} + n_{ab} + n_{bb}}$$

10  
11  
12 where  $n_{aa}$ ,  $n_{ab}$ ,  $n_{bb}$  is the number of times the genotypes AA, AB, and BB are called for the  
13  
14 individual at that marker. There were 27,937 markers with control replicate discordance greater  
15  
16 than 0.05 (i.e. concordance < 0.95).  
17  
18

### 19 *Sex genotype frequency discordance*

20  
21 To detect deviation in genotype frequency of markers between sexes, we used Fisher's exact  
22  
23 test on the 2x3 table of genotype counts for autosomal SNPs (or 2x2 table of allele counts for  
24  
25 the sex-specific regions of the X chromosome). There were 248 markers with discordant  
26  
27 genotype counts or allele counts between sexes with p-value <  $3.5 \times 10^{-10}$ .  
28  
29

### 30 *Summary of results from marker-based tests*

31  
32 There were 37,706 SNPs that were flagged by one or more of the 4 tests. They are labeled in  
33  
34 the marker quality control file accompanying this data release. The effect of this quality  
35  
36 analysis is depicted by comparing [Supplementary Figure S3](#) with [Figure 1](#) where there is clear  
37  
38 improvement in the concordance in minor allele frequency between batches after removal of  
39  
40 these markers. We recommend to remove these markers, but have maintained these markers in  
41  
42 the dataset so that researchers have access to all data. In addition, 15,616  
43  
44 insertions/deletions(indels) and 95,363 low-frequency SNPs with minor allele frequency (MAF) <  
45  
46 0.005 were flagged as they may bias subsequent sample-based quality control.  
47  
48  
49

### 50 *Sample-based quality control*

51  
52 This sample-based quality control was intended to identify genotyped samples of low-quality,  
53  
54 related individuals, and provide a genetic-based description of ancestry. We thus encourage  
55  
56  
57  
58  
59

1  
2  
3 researchers using this information included in the data release to filter samples or devise their  
4 own sample quality control metrics that satisfy their research requirements.

5  
6  
7 We selected the SNP markers that passed all 4 tests from marker-based quality control with  
8 MAF > 0.01 and marker-wise missingness < 0.01 resulting in a total of 573,386 markers. The  
9 software program PLINK was used to LD- prune these markers to a subset of 161,536  
10 independent markers that were used for the following sample-wise assessments. The pruning  
11 was done on window size of 5000 kb with pairwise  $r^2$  threshold as 0.1 and the number of  
12 variants to shift the window as 5.  
13  
14  
15  
16  
17  
18

### 19 *Familial relatedness*

20  
21  
22 Familial relationships among CLSA participants were not recorded in the questionnaires or  
23 interviews. However, this information is essential for some epidemiological and genomic analyses.  
24 Using the KING software <sup>7</sup> we computed all pairwise kinship coefficients and noted all pairs with  
25 inferred relatedness of 3rd degree or closer using autosomal SNPs ([Table 2](#), [Supplementary](#)  
26 [Figure S4](#)). Individuals with an inferred relationship of 3rd degree or closer are labeled in the  
27 database.  
28  
29  
30  
31  
32  
33

### 34 *Detection of outliers in heterozygosity and missing rates*

35  
36  
37 Since extreme values in sample-wise heterozygosity and missingness may suggest low quality  
38 genotyping or cross-contamination of biological samples, we detected outliers by using PLINK  
39 ([Supplementary Figure S5](#)). As expected, because the allele frequencies differ between  
40 populations, we observed that heterozygosity was dependent on self-reported cultural  
41 background.  
42  
43  
44  
45  
46

### 47 *Population structure*

48  
49 Population structure was computed by principal component analysis (PCA) <sup>11</sup> to complement  
50 self-reported ancestry and control for population stratification in GWAS <sup>12 13</sup>. The top 20 principal  
51 components were computed using a high-quality subset of unrelated individuals by removing  
52  
53  
54  
55  
56  
57  
58  
59  
60

1  
2  
3 individuals classified as outliers in heterozygosity and missingness, and any individual with a  
4 relation of 3rd degree or less.  
5

#### 6 7 *Selection of European ancestry subset*

8  
9 To reduce the effect of population structure on analyses such as GWAS it is recommended to  
10 use a subset of the population with relatively homogeneous ancestry. The majority of individuals  
11 in this genomic data release are of self-reported European ancestry (N=25,172). We combined  
12 self-reported ancestry with genomic information and PCA analysis to identify a subset of self-  
13 reported European individuals with relatively homogenous ancestry and refer to this subset as  
14 the “CLSA European ancestry subset”.  
15  
16  
17  
18  
19  
20  
21  
22  
23

24 To determine the CLSA European ancestry subset we clustered the top 4 principal components  
25 from the analysis of population structure in the previous section into 6 clusters. Visualization of  
26 these clusters alongside those from 1000 Genomes reveals a clear overlap of the largest cluster  
27 (cluster 4, N=24,655) with populations of European ancestry in 1000 Genomes ([Figure 2](#)).  
28  
29

30 Moreover, this largest cluster contains the vast majority of individuals in CLSA that self-report  
31 European ancestry ([Table 3, Supplementary Table S2](#)). The European ancestry subset has  
32 markedly reduced variance in the top principal components as compared to the entire CLSA  
33 cohort ([Supplementary Figure S6](#)). The top 20 principal components of the PCA analysis are  
34 provided in the sample QC file accompanying this data release, as well as the top 10 principal  
35 components of the PCA analysis from the CLSA European ancestry subset.  
36  
37  
38  
39  
40  
41  
42  
43  
44

#### 45 *Detection of copy number abnormalities associated with disease*

##### 46 47 *Sex chromosome abnormalities*

48  
49 The sex was called by both Affymetrix Axiom™ Analysis Suite 2.0 and PLINK. Affymetrix uses  
50 the ratio of mean signal values of non-polymorphic probes separately on the X and Y  
51 chromosomes to calculate sex. PLINK determines sex by using only X chromosome inbreeding  
52 coefficient (F estimates). When a subject has sex chromosomal abnormalities such as Turner  
53  
54  
55  
56  
57  
58  
59  
60

1  
2  
3 syndrome (45, X), Affymetrix will call them female but PLINK will call them male. Similarly, when  
4  
5 a subject has Klinefelter Syndrome (47, XXY), Affymetrix will call the subject male but PLINK  
6  
7 will call them female. We use this discordance information combined with copy number profiling  
8  
9 to identify chromosomal abnormalities in CLSA participants.  
10

11 To correct the miscalling of males by stringent Affymetrix default threshold, the intensity data of  
12  
13 chromosome X and Y markers from all UK Biobank samples were used as a training data set to  
14  
15 generate a Support Vector Machine (SVM) model. This SVM model was applied to CLSA  
16  
17 samples to recall the vast majority of miscalled samples (331 out of 359). However, the SVM  
18  
19 approach as aforementioned could not be applied to PLINK sex calling since the sex calling in  
20  
21 UK Biobank data was already corrected. Alternatively, an empirical threshold was used to recall  
22  
23 most (140 out of 175) of the samples miscalled by PLINK through setting X chromosome F  
24  
25 estimate  $< 0.3$  as female and  $> 0.8$  as male. We used a relatively more stringent threshold of F  
26  
27 estimate because high F estimates may indicate mosaic chromosomal abnormalities such as  
28  
29 mosaic deletion. Finally, we used Axiom CNV Summary Tool to calculate log<sub>2</sub> ratio and B allele  
30  
31 frequency (BAF, which is in fact the within person ratio of B/B+A intensity at each SNP) for both  
32  
33 X and Y chromosomes from the genotyping data. The log<sub>2</sub> ratio and BAF were used to identify  
34  
35 sex chromosomal abnormalities compared to normal male and female (Figure 3 (A-B)).  
36  
37

38  
39 As a result, we detected 63 participants with discordance between self-reported sex and  
40  
41 Affymetrix and/or PLINK sex calling (Supplementary Table S2), then we examined their CNV to  
42  
43 identify them as one of four scenarios, sex chromosomal aneuploidy (11 subjects), mosaic sex  
44  
45 chromosomal aneuploidy (15 subjects), low heterozygosity on the X chromosome (14 subjects),  
46  
47 discordance between X chromosome number and self-reported sex without sex chromosomal  
48  
49 aneuploidy (23 subjects). Briefly, we identified all 5 participants with self-reported sex  
50  
51 chromosomal abnormalities including 1 mosaic Turner syndrome patient (45,X/46,XY)  
52  
53 (scenarios 1 and 2). We identified all 48 participants with sex discordance as in  
54  
55 abovementioned sex check. For the 23 participants who had discordance with both Affymetrix  
56  
57  
58  
59

1  
2  
3 and PLINK calling, CNV analysis confirmed the sex chromosome composition (scenario 4). In  
4  
5 addition, for participants with no self-reported sex, Affymetrix/PLINK calling and CNV analysis  
6  
7 are concordant to call sex. Besides the validated self-reported sex chromosomal abnormalities,  
8  
9 we identified 4 participants with Klinefelter syndrome (47,XXY) and 3 with Turner Syndrome  
10  
11 (45,X) (scenario 1) (Figure 3 (C-D)). In total, we found 3 participants with 45,X/46,XX  
12  
13 mosaicism, and 11 participants with 45,X/46,XY mosaicism including 1 with self-reported Turner  
14  
15 syndrome (45,X/46,XY) (Figure 3 (E-F)). Additionally, individuals with low heterozygosity on  
16  
17 chromosome X could be a result of inbreeding (Supplementary Figure S7).

### 18 19 20 *Charcot-Marie-Tooth Disease*

21  
22 Charcot-Marie-Tooth disease (CMT) is one of the most common inherited neurological  
23  
24 disorders. It is mostly caused by duplication at 17p12 where *PMP22* is located (CMT1A and  
25  
26 CMT1E; OMIM: # 118220; # 118300). In this release of CLSA genomic data, there are 9 CLSA  
27  
28 participants who self-reported as having CMT. We examined their CNVs and found that 4  
29  
30 participants have duplication at *PMP22* (Supplementary Figure S8), and 1 participant has  
31  
32 deletion at *PMP22* (Supplementary Figure S8). The other 4 subjects did not have CNVs  
33  
34 detected at *PMP22*.

### 35 36 37 *HLA type imputation*

38  
39 We used the HLA\*IMP:02 method<sup>14</sup> and a multi-population reference panel<sup>14</sup> (ThermoFisher  
40  
41 Catalog # 000.911) to impute HLA types. The genotypes of 11 major MHC Class I and Class II  
42  
43 loci with 4-digit resolution were imputed for *HLA-A*, *-B*, *-C*, *-DPA1*, *-DPB1*, *-DQA1*, *-DQB1*, *-*  
44  
45 *DRB1*, *-DRB3*, *-DRB4*, *-DRB5*. For the positive controls, the imputation was done for 587  
46  
47 replicates of NA12878, 75 replicates of NA24385 and 4 replicates of NA10859. The alleles  
48  
49 called with a posterior probability threshold as 0.7 were compared to their known genotypes  
50  
51 from literature. Calling accuracy was 100% across the loci (Supplementary Table S3). The  
52  
53 imputation accuracy of genotyped CLSA participants was estimated by using the replicated  
54  
55 samples. The validation rate is 100% for all the replicates.  
56  
57  
58  
59  
60



### ***Imputation to the TopMed reference panel***

Genotype imputation is a computational method to predict marker genotypes that are not directly genotyped by an assay, such as genotyping array. The imputation process uses a reference panel of sequenced individuals to predict genotypes in a study sample for which only a subset of these genetic markers has been genotyped<sup>15</sup>. As input to the imputation process, we used the 26,622 CLSA participants that passed quality control, and the set of 653,729 markers that pass all marker QC tests, with SNP-wise missingness < 0.05, MAF > 0.0001 and have alleles that match the human genome GRCh37 reference sequence.

Phasing and imputation were conducted using the TOPMed reference panel<sup>16</sup> at the University of Michigan Imputation Service<sup>17</sup>. We used the TOPMed reference panel version r2, containing 97,256 reference samples at 308,107,085 genetic markers. We used this imputation service to pre-phase and impute the CLSA genotype data using EAGLE2<sup>18</sup> and Minimac<sup>15</sup>, respectively. Both autosomal and X chromosome variants were imputed. The imputation was carried out in two batches of 13,310 and 13,312 CLSA samples. Each batch also included the one of each 3 control samples. The two batches were subsequently merged into a single dataset.

### ***Imputation performance***

Imputation quality using the TOPMed reference panel was assessed using the marker-wise information measure (Rsq) and compared to the imputation using the Haplotype Reference Consortium reference panel containing 32,488 reference samples and 40.4 million genetic markers<sup>19</sup>. For each imputation data set, information measures for all SNPs on chromosome 22 were stratified into MAF bins prior to comparison. Comparison of imputation quality between the two reference panels demonstrated that the TOPMed reference panel yielded overall higher imputation quality, likely due to the larger number of samples included in the reference panel ([Supplementary Figure S9](#)).

### **Findings to date**

1  
2  
3 This data resource has been used in three completed and several ongoing studies. In a study to  
4 investigate the contribution of polygenic risk score (GRS) to screening for fracture risk <sup>20</sup>, the  
5 CLSA genomic data was linked to the participants' physical examinations. It was the largest  
6 cohort included in this fracture risk study for testing, which enabled the researchers to  
7 understand the performance of GRS particularly in old-aged individuals. It was found that the  
8 genetic pre-screening could reduce the number of further assessments to identify individuals at  
9 high risk of osteoporotic fractures. In another study on cardiovascular disease <sup>21</sup>, the  
10 investigators evaluated the independent effects and interactions of multiscale risk factors by  
11 taking advantage of combined genomic and psychosocial information collected in CLSA cohort.  
12 In addition, the CLSA dataset provides opportunities to study other conditions related to  
13 complex diseases. It was employed by a large scale GWAS on sleep apnoea which was  
14 associated with cardiovascular disease and glaucoma. The authors revealed robust novel  
15 associations between 30 genes and this condition, and substantial molecular overlap with other  
16 complex traits <sup>22</sup>. For further publications please consult [https://www.clsa-elcv.ca/stay-](https://www.clsa-elcv.ca/stay-informed/publications)  
17 [informed/publications](https://www.clsa-elcv.ca/stay-informed/publications).  
18  
19  
20  
21  
22  
23  
24  
25  
26  
27  
28  
29  
30  
31  
32  
33  
34  
35  
36

### 37 **Strengths and limitations**

38  
39 The CLSA genomic data are a unique resource nested in a large-scale, longitudinal study  
40 profiling aging population in Canada. The genotyping array is enriched with known markers  
41 associated with multiple phenotypes. However, the UK Biobank array may have relatively lower  
42 coverage in participants with non-European ancestry. The sample size may be small to identify  
43 very rare variants. In spite of these limitations, CLSA cohort includes deep and extensive  
44 phenotyping and planned linkage to health administrative databases. This data resource will  
45 facilitate the research on complex relationship between human genomic variants and a wide  
46 spectrum of environmental, lifestyle, and medical factors. The comprehensive  
47 pharmacogenomic and inflammation markers among other disease-associated variants may be  
48  
49  
50  
51  
52  
53  
54  
55  
56  
57  
58  
59  
60

1  
2  
3 of particular interest since DNA methylation, metabolomic and proteomic data are being  
4 generated.  
5  
6  
7  
8

### 9 **Collaboration**

10 The genomic data from the CLSA Comprehensive cohort are accessible via the CLSA Data  
11 Access process (<https://www.clsa-elcv.ca/data-access>). The list of phenotypic variables can be  
12 browsed via the CLSA Data Preview Portal (<https://datapreview.clsa-elcv.ca/>). To be informed of  
13 the potential overlapping research topics, prospective data users are encouraged to consult the  
14 approved project summaries catalogued on the CLSA website ([http://www.clsa-  
15 elcv.ca/researchers/approved-project-summaries](http://www.clsa-elcv.ca/researchers/approved-project-summaries)). Given that this genomic data resource is  
16 released in 2018, we calculated the proportion of data requests including genomic data since  
17 2018. At the time of writing, 17% of approved projects requested genetic data for their studies.  
18 The directly genotyped data are provided in binary PLINK format. It is recommended to use  
19 PLINK to manipulate these files (<https://www.cog-genomics.org/plink/1.9/>). The imputed  
20 genotyped data are provided in binary BGEN version 1.2 format using 8-bit encoding. It is  
21 recommended to use *qctool* version 2 or *bgenix* to manipulate this data type. The HLA  
22 imputation file is a plaintext file containing information pertaining to the imputation of classical  
23 human leukocyte antigen alleles from SNP genotypes.  
24  
25  
26  
27  
28  
29  
30  
31  
32  
33  
34  
35  
36  
37  
38  
39  
40

41 All studies using CLSA genetic data resource are requested to give full acknowledgement to  
42 CLSA in their publications following instructions in *Publication and Promotion Policy for CLSA  
43 Data Users* on <https://www.clsa-elcv.ca>.  
44  
45  
46  
47  
48

### 49 **Funding**

50 Funding for CLSA is provided by the Government of Canada through the Canadian Institutes of  
51 Health Research (CIHR) under grant reference: LSA 94473 and the Canada Foundation for  
52  
53  
54  
55  
56  
57  
58  
59  
60

1  
2  
3 Innovation. The work was also supported by Genome Canada Technology Platform #12505 and  
4  
5 CFI#33408.  
6

7 ***Author contributions***  
8

9 V.F. and R.L. conducted data analyses and drafted the manuscript, C.D-Z. and A.B. generated  
10  
11 data, C.B., D.R., C.W., G.L., G.P., A.D.P., L.E.G., C.V., M.L., S.K., P.R., J.B.R., and J.R  
12  
13 developed the concept and study design. All authors revised the manuscript critically for  
14  
15 important intellectual content and approved the final version to be published.  
16  
17

18 ***Competing interests:*** None declared.  
19  
20  
21  
22  
23  
24  
25  
26  
27  
28  
29  
30  
31  
32  
33  
34  
35  
36  
37  
38  
39  
40  
41  
42  
43  
44  
45  
46  
47  
48  
49  
50  
51  
52  
53  
54  
55  
56  
57  
58  
59  
60

**Reference:**

1. Singh PP, Demmitt BA, Nath RD, et al. The Genetics of Aging: A Vertebrate Perspective. *Cell* 2019;177(1):200-20. doi: 10.1016/j.cell.2019.02.038 [published Online First: 2019/03/23]
2. Melzer D, Pilling LC, Ferrucci L. The genetics of human ageing. *Nat Rev Genet* 2020;21(2):88-101. doi: 10.1038/s41576-019-0183-6 [published Online First: 2019/11/07]
3. Raina P, Wolfson C, Kirkland S, et al. Cohort Profile: The Canadian Longitudinal Study on Aging (CLSA). *Int J Epidemiol* 2019;48(6):1752-53j. doi: 10.1093/ije/dyz173 [published Online First: 2019/10/22]
4. Affymetrix. UKB WCSGAX: UK Biobank 500K Samples Genotyping Data Generation by the Affymetrix Research Services Laboratory. 2017. [http://biobank.ndph.ox.ac.uk/showcase/docs/affy\\_data\\_generation2017.pdf](http://biobank.ndph.ox.ac.uk/showcase/docs/affy_data_generation2017.pdf).
5. Raina PS, Wolfson C, Kirkland SA, et al. The Canadian longitudinal study on aging (CLSA). *Can J Aging* 2009;28(3):221-9. doi: 10.1017/S0714980809990055 [published Online First: 2009/10/29]
6. UK Biobank Axiom Array | UK Biobank [Available from: <http://www.ukbiobank.ac.uk/scientists-3/uk-biobank-axiom-array/> accessed 10. Apr. 2018.
7. Manichaikul A, Mychaleckyj JC, Rich SS, et al. Robust relationship inference in genome-wide association studies. *Bioinformatics* 2010;26(22):2867-73. doi: 10.1093/bioinformatics/btq559 [published Online First: 2010/10/12]
8. Chang CC, Chow CC, Tellier LC, et al. Second-generation PLINK: rising to the challenge of larger and richer datasets. *Gigascience* 2015;4:7. doi: 10.1186/s13742-015-0047-8 [published Online First: 2015/02/28]
9. Chang SPaC. PLINK 1.9 [Available from: <https://www.cog-genomics.org/plink1.9> accessed 27. Apr 2018.
10. Wigginton JE, Cutler DJ, Abecasis GR. A note on exact tests of Hardy-Weinberg equilibrium. *Am J Hum Genet* 2005;76(5):887-93. doi: 10.1086/429864 [published Online First: 2005/03/25]
11. Galinsky KJ, Bhatia G, Loh PR, et al. Fast Principal-Component Analysis Reveals Convergent Evolution of ADH1B in Europe and East Asia. *Am J Hum Genet* 2016;98(3):456-72. doi: 10.1016/j.ajhg.2015.12.022 [published Online First: 2016/03/01]
12. Balding DJ. A tutorial on statistical methods for population association studies. *Nat Rev Genet* 2006;7(10):781-91. doi: 10.1038/nrg1916 [published Online First: 2006/09/20]
13. Price AL, Patterson NJ, Plenge RM, et al. Principal components analysis corrects for stratification in genome-wide association studies. *Nat Genet* 2006;38(8):904-9. doi: 10.1038/ng1847 [published Online First: 2006/07/25]
14. Dilthey A, Leslie S, Moutsianas L, et al. Multi-population classical HLA type imputation. *PLoS Comput Biol* 2013;9(2):e1002877. doi: 10.1371/journal.pcbi.1002877 [published Online First: 2013/03/06]

15. Fuchsberger C, Abecasis GR, Hinds DA. minimac2: faster genotype imputation. *Bioinformatics* 2015;31(5):782-4. doi: 10.1093/bioinformatics/btu704 [published Online First: 2014/10/24]
16. Taliun D, Harris DN, Kessler MD, et al. Sequencing of 53,831 diverse genomes from the NHLBI TOPMed Program. *Nature* 2021;590(7845):290-99. doi: 10.1038/s41586-021-03205-y [published Online First: 2021/02/12]
17. Das S, Forer L, Schonherr S, et al. Next-generation genotype imputation service and methods. *Nat Genet* 2016;48(10):1284-87. doi: 10.1038/ng.3656 [published Online First: 2016/08/30]
18. Loh PR, Danecek P, Palamara PF, et al. Reference-based phasing using the Haplotype Reference Consortium panel. *Nat Genet* 2016;48(11):1443-48. doi: 10.1038/ng.3679 [published Online First: 2016/10/28]
19. McCarthy S, Das S, Kretzschmar W, et al. A reference panel of 64,976 haplotypes for genotype imputation. *Nat Genet* 2016;48(10):1279-83. doi: 10.1038/ng.3643 [published Online First: 2016/08/23]
20. Forgetta V, Keller-Baruch J, Forest M, et al. Development of a polygenic risk score to improve screening for fracture risk: A genetic risk prediction study. *PLoS Med* 2020;17(7):e1003152. doi: 10.1371/journal.pmed.1003152 [published Online First: 2020/07/03]
21. Menniti G, Paquet C, Han HY, et al. Multiscale Risk Factors of Cardiovascular Disease: CLSA Analysis of Genetic and Psychosocial Factors. *Front Cardiovasc Med* 2021;8:599671. doi: 10.3389/fcvm.2021.599671 [published Online First: 2021/04/03]
22. Campos AI, Ingold N, Huang Y, et al. Genome-wide analyses in 1,987,836 participants identify 39 genetic loci associated with sleep apnoea. *medRxiv* 2020:2020.09.29.20199893. doi: 10.1101/2020.09.29.20199893

**Table1:** Count of CLSA genotyped participants by self-reported gender and sex chromosome composition

| <b>Self-reported Gender</b> | <b>Sex Chromosome Composition</b> | <b>Count</b> |
|-----------------------------|-----------------------------------|--------------|
| Male                        | Male                              | 13324        |
| Female                      | Female                            | 13250        |
| Female                      | Male                              | 17           |
| Male                        | Female                            | 16           |
| Female                      | Undefined                         | 10           |
| Male                        | Undefined                         | 5            |

**Table 2:** Count of kinship pairs per type of inferred relationship

| Inferred Relationship  | Count  |
|------------------------|--------|
| Monozygotic twin       | 1      |
| Full sibling           | 357    |
| Parent/offspring       | 176    |
| 2 <sup>nd</sup> degree | 315    |
| 3 <sup>rd</sup> degree | 1066   |
| Unrelated              | 123294 |

For peer review only



**Table 3:** Count of CLSA genotyped participants per self-reported ancestry and k-means cluster

| Self-reported ancestry <sup>a</sup> | k-means cluster |     |     |       |     |    |
|-------------------------------------|-----------------|-----|-----|-------|-----|----|
|                                     | 1               | 2   | 3   | 4     | 5   | 6  |
| Black                               | 7               | 0   | 156 | 0     | 7   | 0  |
| East Asian                          | 0               | 214 | 1   | 2     | 0   | 3  |
| Latin American                      | 1               | 0   | 1   | 2     | 9   | 72 |
| Mixed                               | 11              | 11  | 7   | 207   | 61  | 21 |
| Other                               | 11              | 5   | 8   | 54    | 53  | 41 |
| South Asian                         | 211             | 5   | 0   | 0     | 7   | 0  |
| Southeast Asian                     | 20              | 61  | 0   | 0     | 1   | 1  |
| West Asian                          | 4               | 0   | 1   | 2     | 98  | 0  |
| White                               | 7               | 2   | 0   | 24380 | 742 | 41 |
| White and Asian                     | 3               | 3   | 0   | 5     | 19  | 11 |
| White and Black                     | 2               | 0   | 11  | 3     | 17  | 0  |

<sup>a</sup>The details of grouping self-reported cultural and racial category into fewer groups are in Supplementary Table S2

1  
2  
3 **Figure 1:** Pairwise plot of allele frequency of SNPs that pass all 4 tests from genotype batch 1  
4 to 5.  
5

6  
7 The SNPs are considered as passed if they have nonsignificant p-value (Fisher's  $p > 3.5 \times$   
8  $10^{-10}$ ) below the multiple testing corrected threshold for the respective test on discordant  
9 genotype frequency between batch, departure from HWE, discordance between the positive  
10 control replicates and on discordant genotype frequency between male and female.  
11  
12  
13  
14  
15  
16  
17  
18  
19  
20  
21  
22  
23  
24  
25  
26  
27  
28  
29  
30  
31  
32  
33  
34  
35  
36  
37  
38  
39  
40  
41  
42  
43  
44  
45  
46  
47  
48  
49  
50  
51  
52  
53  
54  
55  
56  
57  
58  
59  
60

1  
2  
3 **Figure 2:** Determining the CLSA European ancestry subset.  
4

5 (A) Top 4 principal components from all 1000 Genomes populations labelled and coloured.  
6

7 Population code refers to <https://www.internationalgenome.org/category/population/>. (B) Top 4  
8

9 principal components from CLSA color coded and labelled by cluster number.  
10  
11  
12  
13  
14  
15  
16  
17  
18  
19  
20  
21  
22  
23  
24  
25  
26  
27  
28  
29  
30  
31  
32  
33  
34  
35  
36  
37  
38  
39  
40  
41  
42  
43  
44  
45  
46  
47  
48  
49  
50  
51  
52  
53  
54  
55  
56  
57  
58  
59  
60

For peer review only

1  
2  
3 **Figure 3:** BAF (TOP) and log<sub>2</sub> ratio (BOTTOM) of chromosomes X and Y are shown for sex  
4 chromosome abnormalities.  
5

6  
7 (A) In 46,XY, the BAF is either 0 or 1 and the expected log<sub>2</sub> Ratio is less than 0 on chromosome  
8 X. However, in the pseudoautosomal region (PAR) and the chrY11.2/chrXq21.3 homology  
9 block, there are heterozygous calls in male shown as BAF of 0.5. The red line shows the lowest  
10 curve for log<sub>2</sub> Ratio. The BAF is either 0 or 1 and the expected log<sub>2</sub> Ratio is 0 on chromosome  
11 Y. (B) In 46,XX, the BAF is either 0 (AA), ½ (AB) or 1 (BB) and the expected Log<sub>2</sub> Ratio is 0 on  
12 chromosome X as in a normal diploid cell. The BAF is between 0 and 1, and Log<sub>2</sub> Ratio is less  
13 than 0 on chromosome Y. (C) For Klinefelter syndrome (47,XXY), log<sub>2</sub> ratio is around 0 on  
14 chromosome X which indicates ploidy as 2N. Compared to 46,XY, there is relatively lower  
15 peaks of log<sub>2</sub> ratio at PAR and chrX21.3/chrY11.2 homology block region. And BAF of  
16 heterozygous calls at PAR and chrX21.3/chrY11.2 homology block region shifted from 0.5 to  
17 intermediate values. They both indicated an extra copy of chromosome X. Chromosome Y  
18 intensity profile showed clear male pattern. (D) For Turner syndrome (45,X), on chromosome X,  
19 log<sub>2</sub> ratio is below 0 and there is no BAF bands of 0.5, which indicates one copy loss.  
20 Chromosome Y intensity profile showed clear female pattern. (E) For 45,X/46,XX mosaicism, on  
21 chromosome X, there is a relatively smaller decrease of log<sub>2</sub> ratio compared to 1 copy of  
22 chromosome X as in male. The BAF of heterozygous calls on chromosome X is split to  
23 intermediate values. They both indicate that the sample is mosaic for deletion of chromosome  
24 X. Chromosome Y intensity profile showed clear female pattern. (F) For 45,X/46,XY mosaicism,  
25 the log<sub>2</sub> ratio less than 0 and no BAF 0.5 band on chromosome X indicates one copy. The log<sub>2</sub>  
26 ratio shifts to below 0 and BAF values between 0 and 1 on chromosome Y indicates  
27 chromosome loss. However, the intermediate BAF values close to 0 or 1 at PAR and  
28 chrX21.3/chrY11.2 homology block region indicates the loss of chromosome Y is existed in a  
29 larger proportion of cells.  
30  
31  
32  
33  
34  
35  
36  
37  
38  
39  
40  
41  
42  
43  
44  
45  
46  
47  
48  
49  
50  
51  
52  
53  
54  
55  
56  
57  
58  
59  
60

1  
2  
3  
4  
5  
6  
7  
8  
9  
10  
11  
12  
13  
14  
15  
16  
17  
18  
19  
20  
21  
22  
23  
24  
25  
26  
27  
28  
29  
30  
31  
32  
33  
34  
35  
36  
37  
38  
39  
40  
41  
42  
43  
44  
45  
46  
47  
48  
49  
50  
51  
52  
53  
54  
55  
56  
57  
58  
59  
60

For peer review only

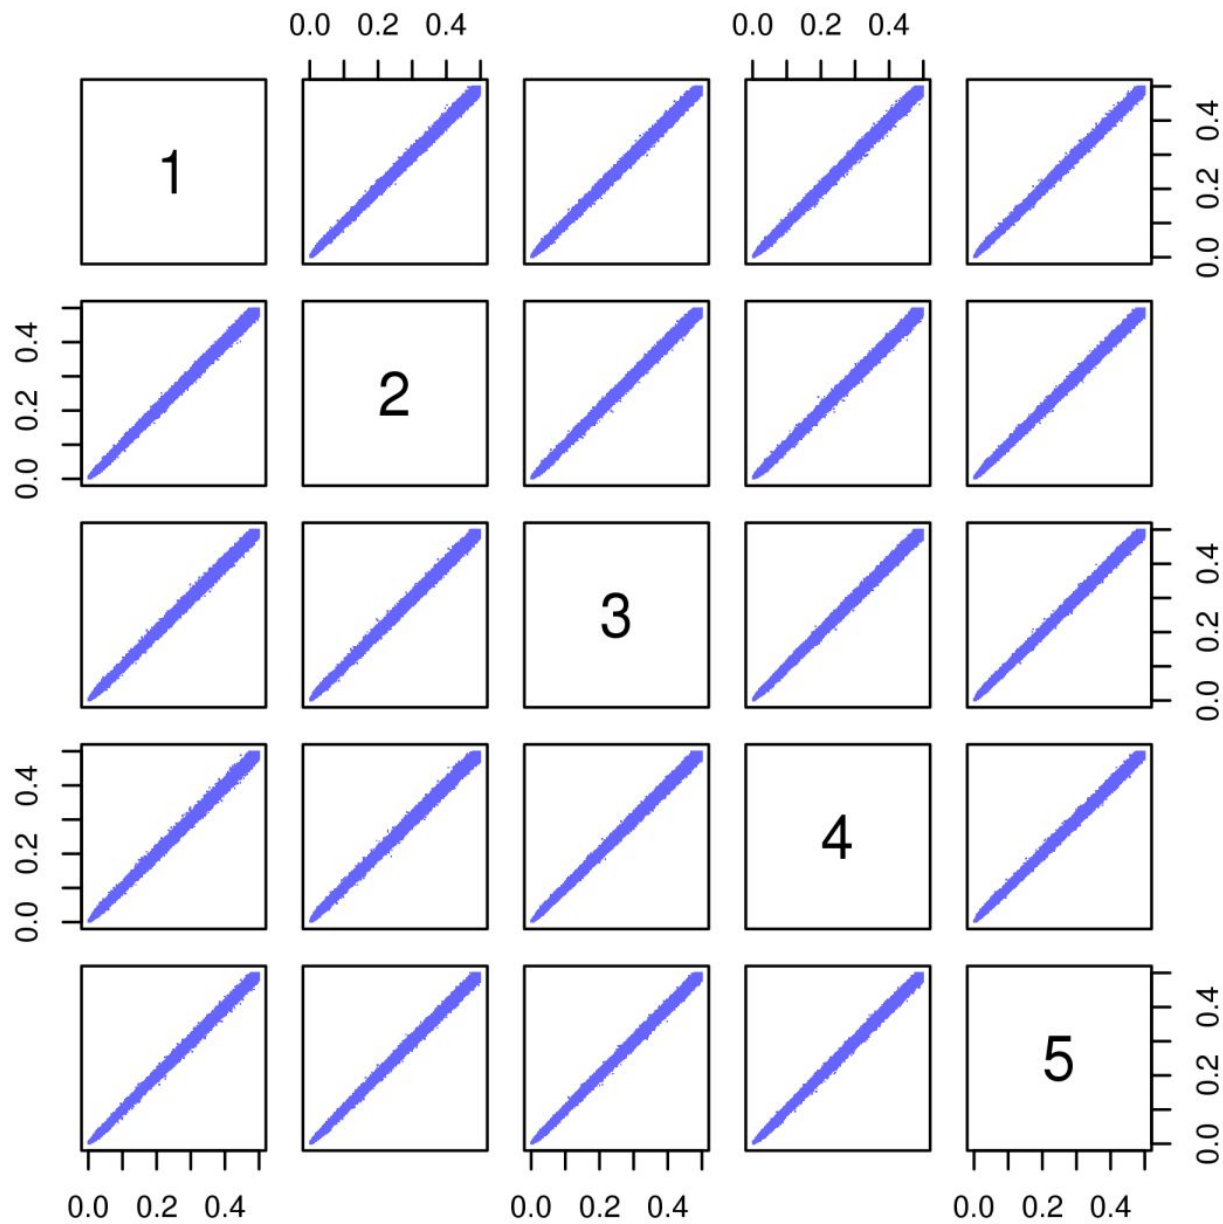

**Figure 1:** Pairwise plot of allele frequency of SNPs that pass all 4 tests from genotype batch 1 to 5.

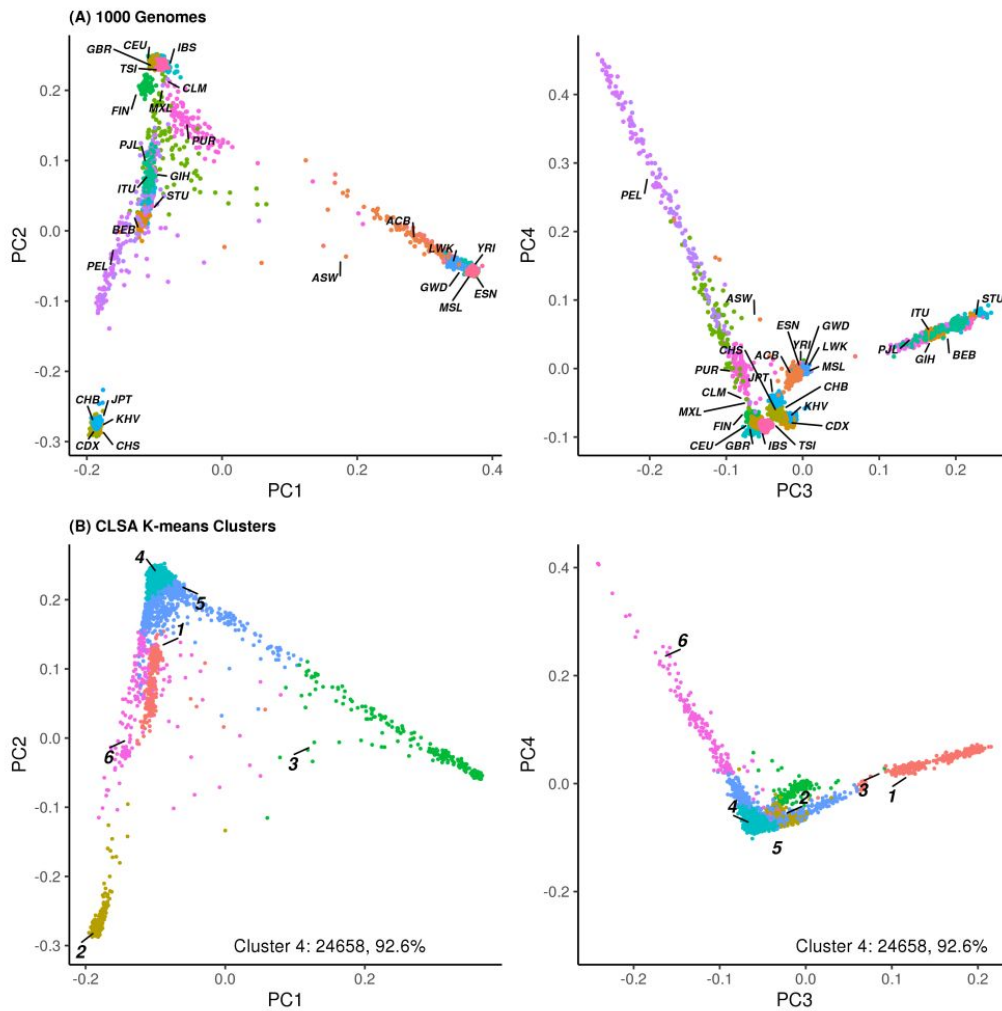

**Figure 2:** Determining the CLSA European ancestry subset.

(A) Top 4 principal components from all 1000 Genomes populations labelled and coloured. Population code refers to <https://www.internationalgenome.org/category/population/>. (B) Top 4 principal components from CLSA color coded and labelled by cluster number.

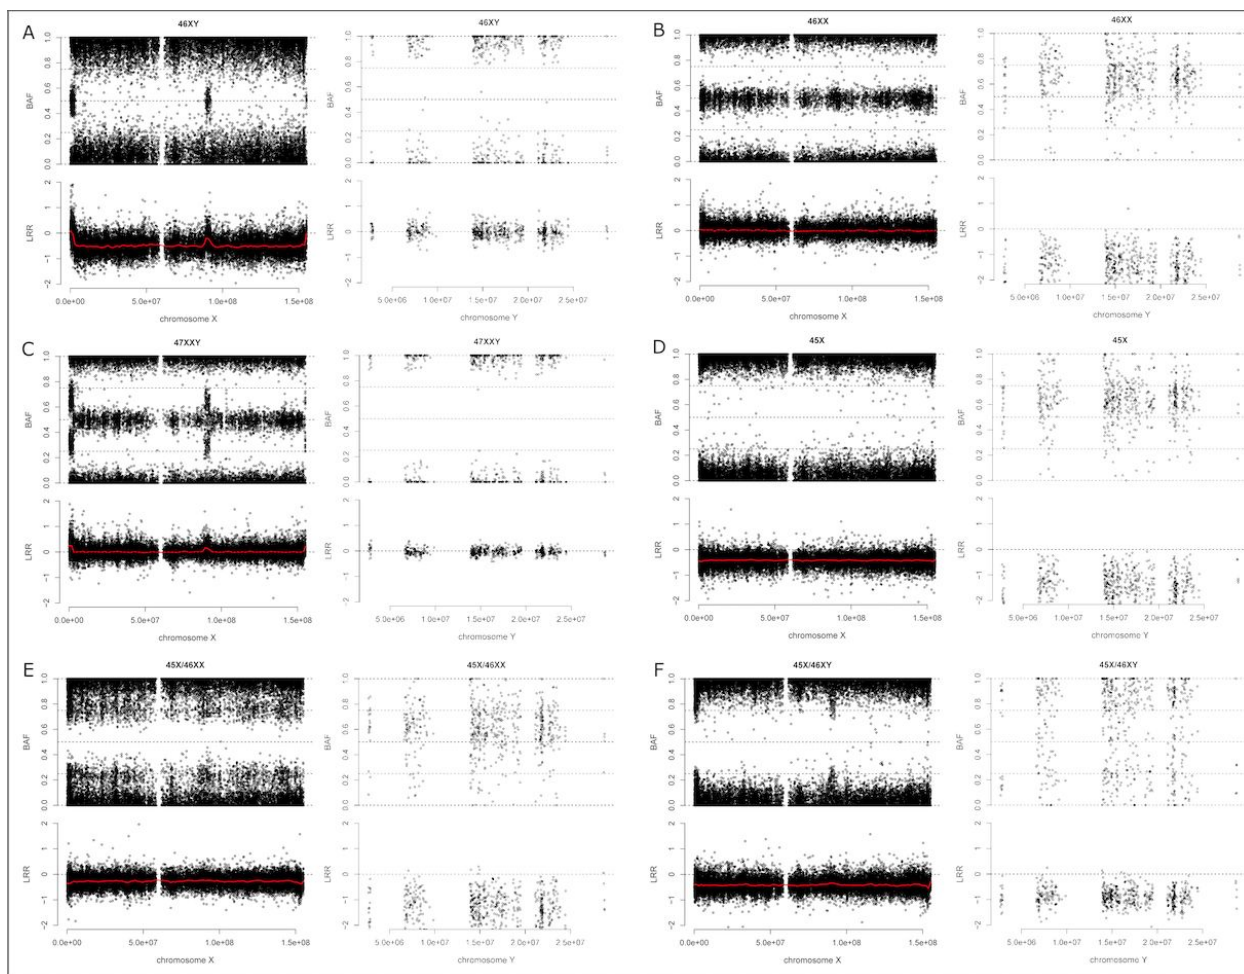

**Figure 3:** BAF (TOP) and log2 ratio (BOTTOM) of chromosomes X and Y are shown for sex chromosome abnormalities.



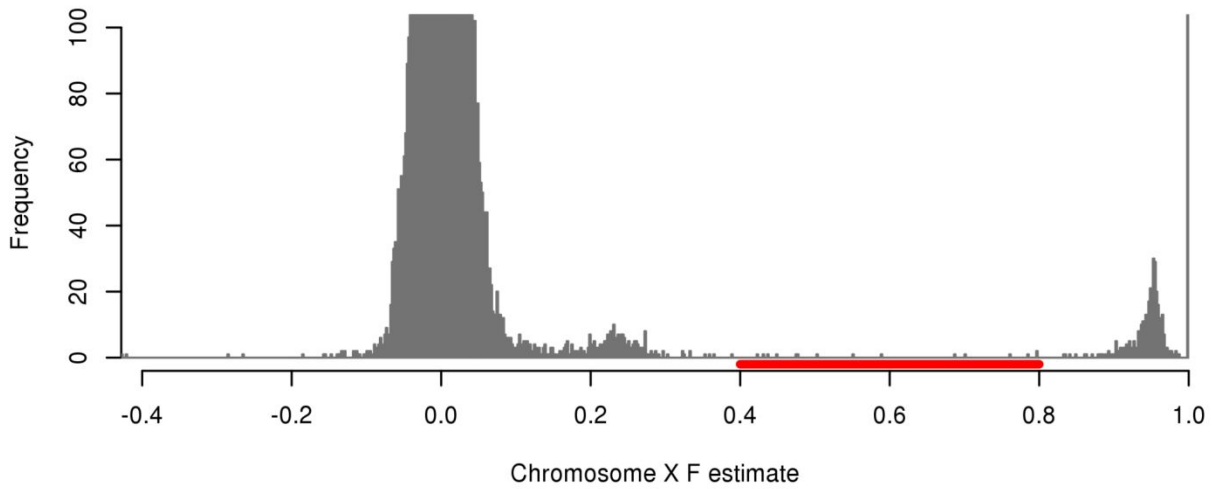

**Supplementary Figure S1:** Distribution of chromosome X F estimates for CLSA genotyped participants (y-axis truncated). Individuals with chromosome X F estimates within the range of 0.4 to 0.8 (red) are considered to have undefined chromosomal sex.

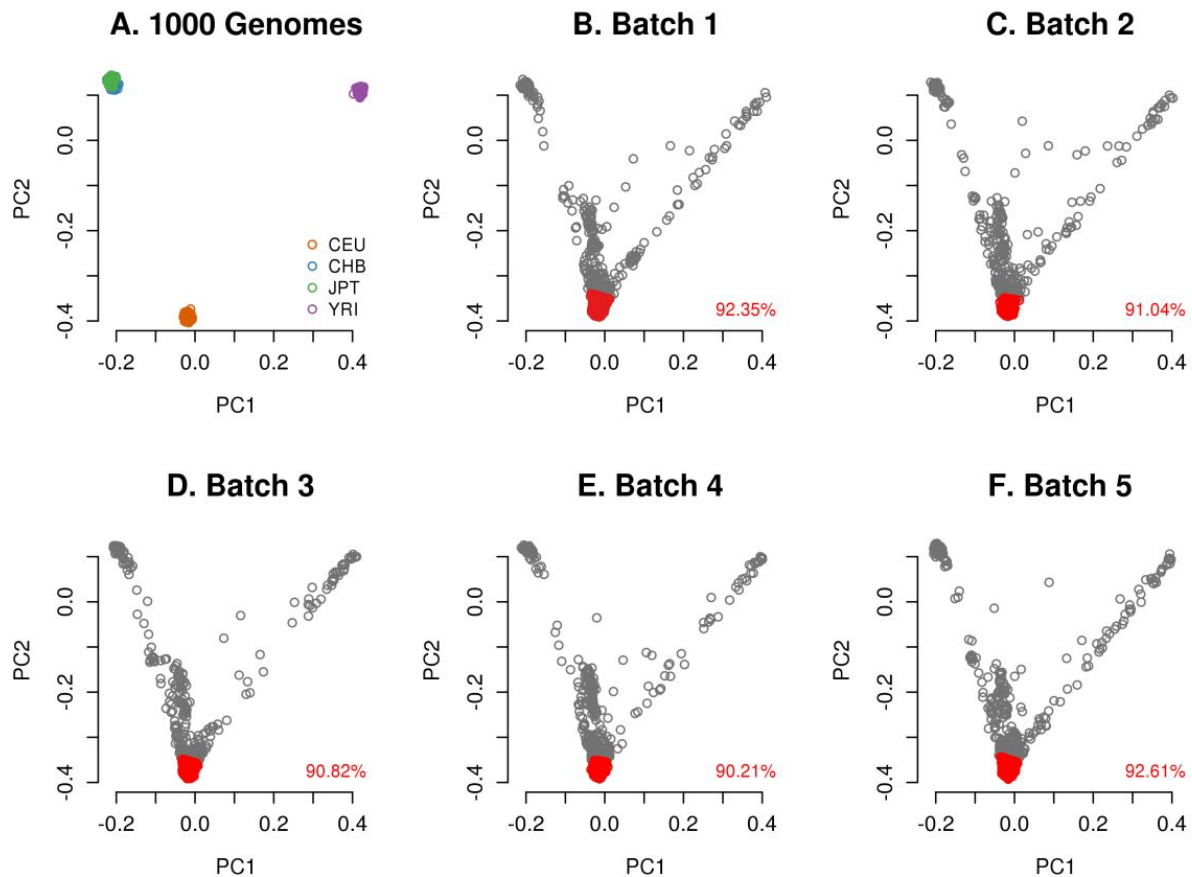

**Supplementary Figure S2:** Principal component (PC) plots. (A) Plot of first 2 PC for the analyzed populations from 1000 Genomes. (B-F) Projection of CLSA participants onto 1000 Genomes PC plot for genotype batch 1 to 5 followed by k-means clustering of PC1-4 (grey points). The largest cluster overlaps the 1000 Genomes CEU population (red points and percentage of total in batch is provided).

1  
2  
3  
4  
5  
6  
7  
8  
9  
10  
11  
12  
13  
14  
15  
16  
17  
18  
19  
20  
21  
22  
23  
24  
25  
26  
27  
28  
29  
30  
31  
32  
33  
34  
35  
36  
37  
38  
39  
40  
41  
42  
43  
44  
45  
46  
47  
48  
49  
50  
51  
52  
53  
54  
55  
56  
57  
58  
59  
60

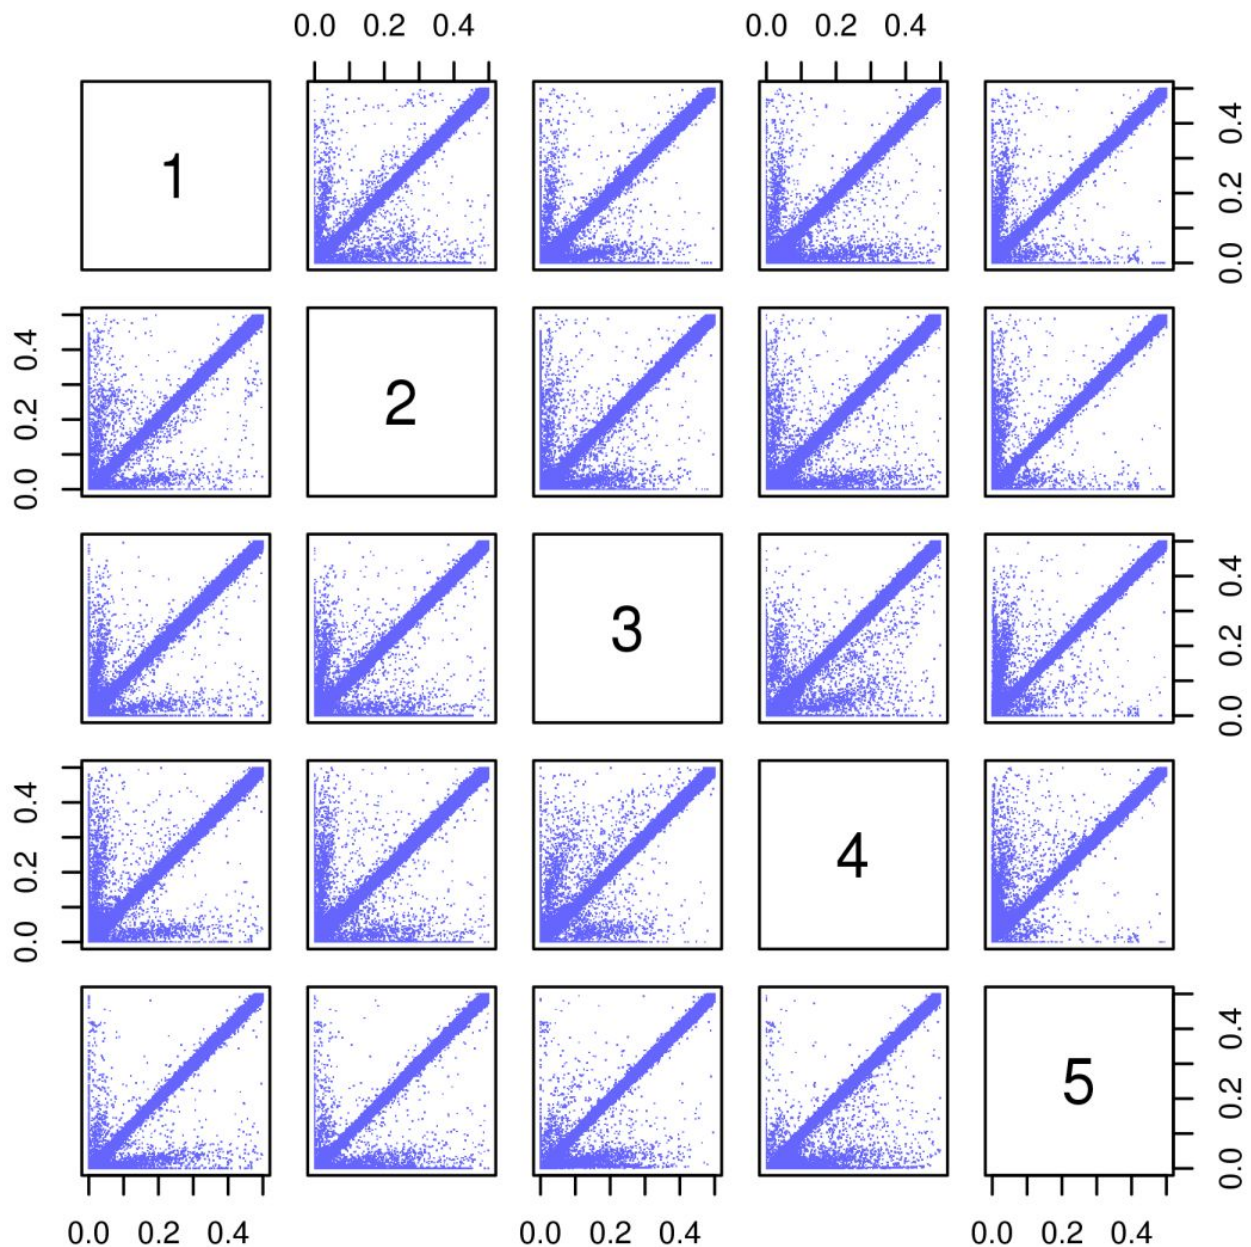

**Supplementary Figure S3:** Pairwise plot of allele frequency of SNPs from genotype batch 1 to 5.

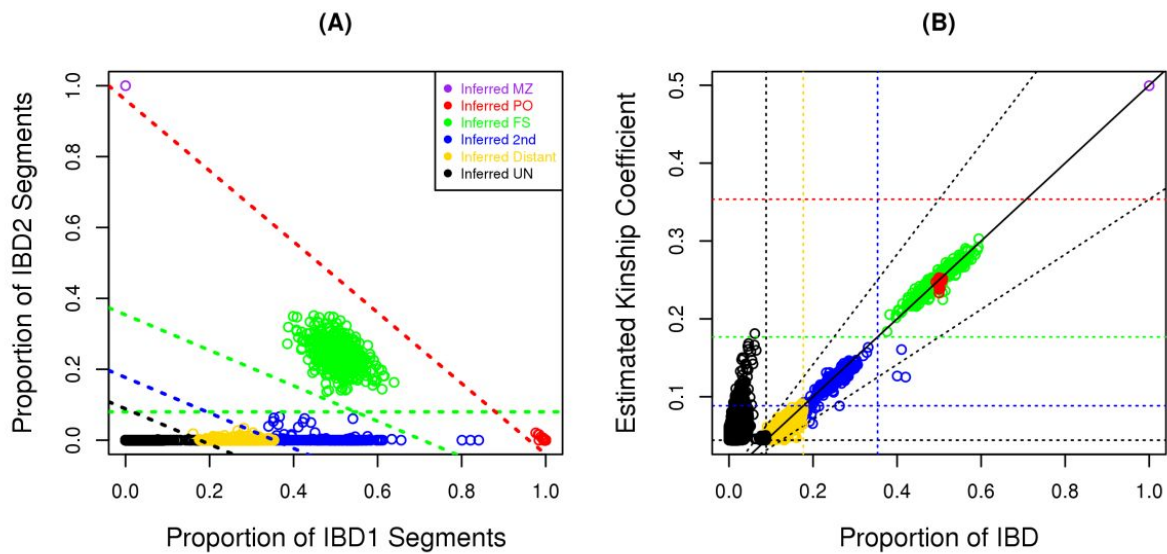

**Supplementary Figure S4:** Inference of familial relatedness using KING.

(A) Inference using IBD segments. (B) Inference using proportion IBD and kinship coefficient.

Relationships in legend are abbreviated as: MZ=Monozygotic twin, PO=Parent/offspring, FS=Full sibling, 2nd=Second-degree relative, 3rd=Third-degree relative, Distant=Greater than 3rd degree relative, UN=Unrelated. Limits for inferring relationship type are indicated by dashed lines that are color-coded to match those listed in the legend.

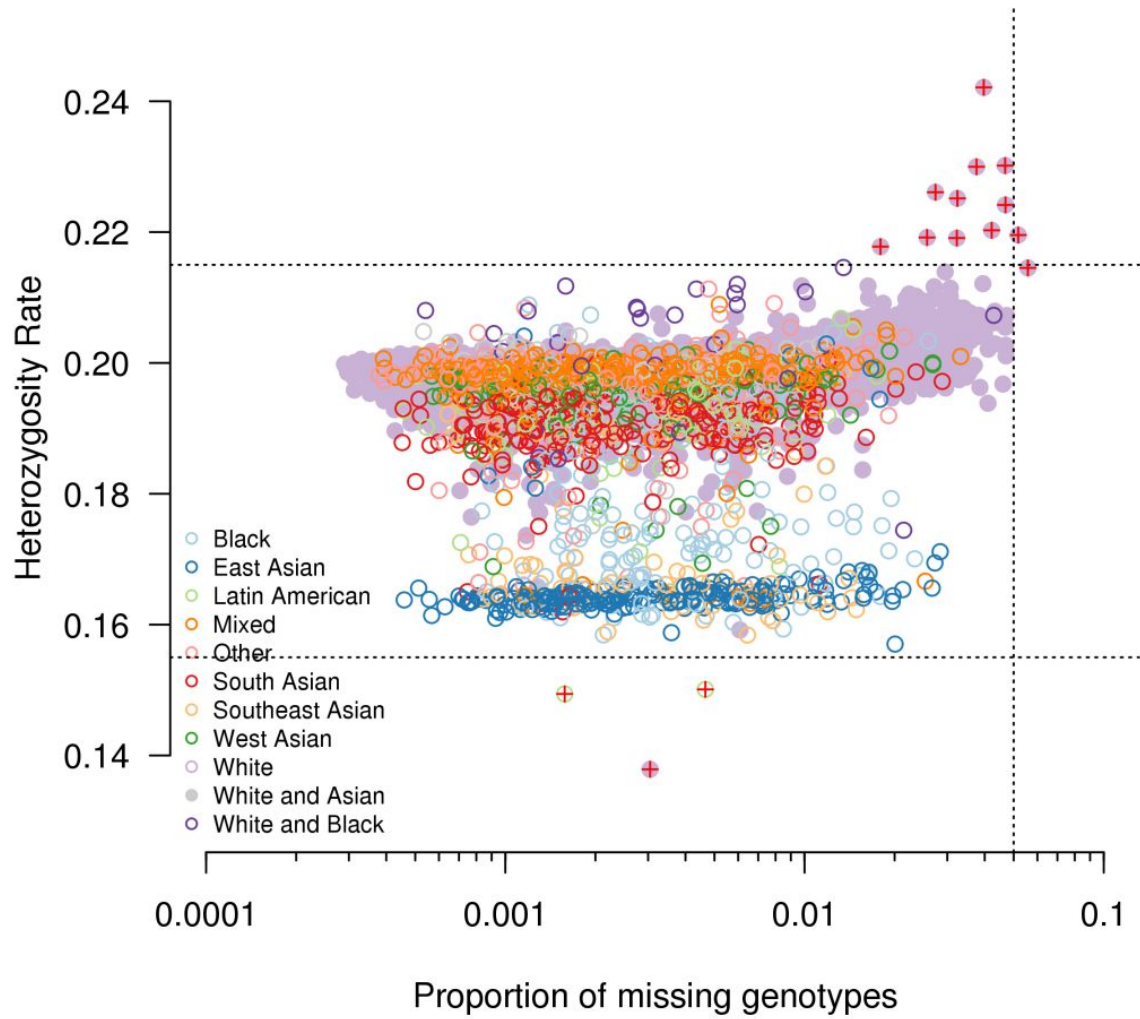

**Supplementary Figure S5:** Sample-wise heterozygosity versus genotype missingness. Points are color coded according to self-reported ancestry category. Outliers are marked with a red plus sign.

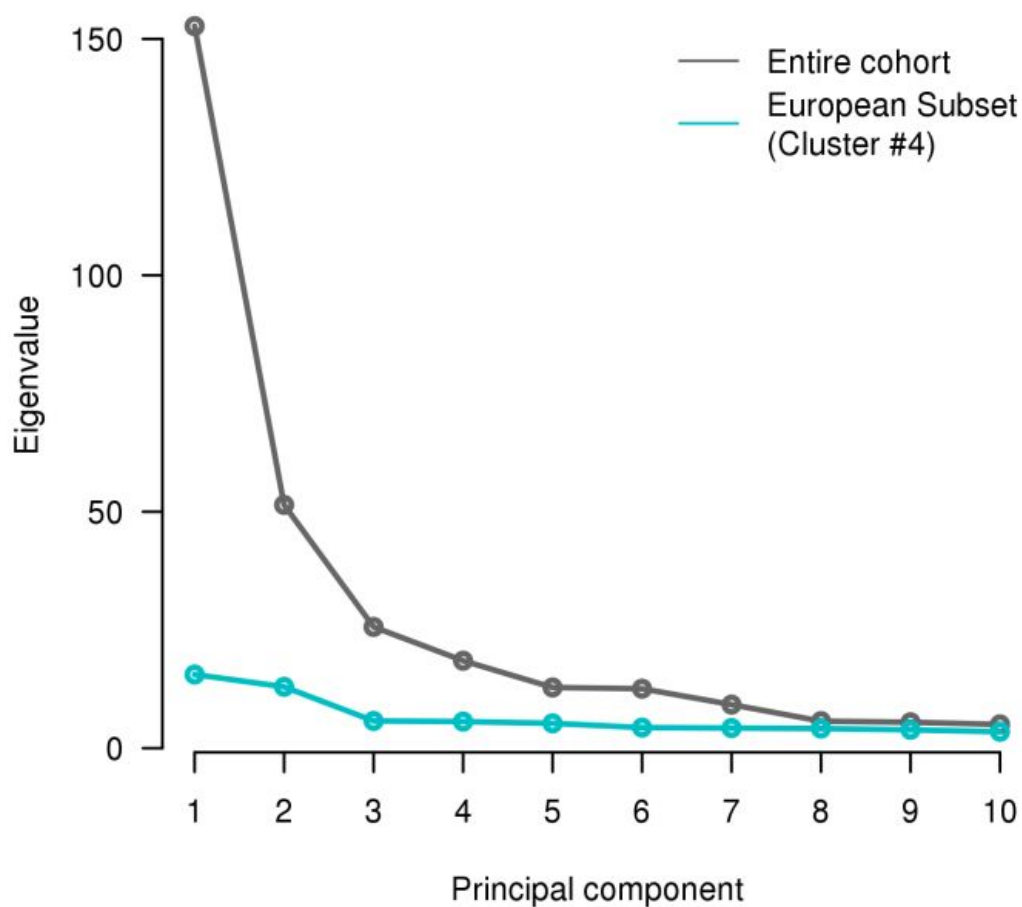

**Supplementary Figure S6:** Eigenvalues for PCA analysis of the entire cohort (grey) and the European ancestry subset (cluster 4, Robin egg blue), demonstrating a reduction in genetic variance within the European ancestry subset.

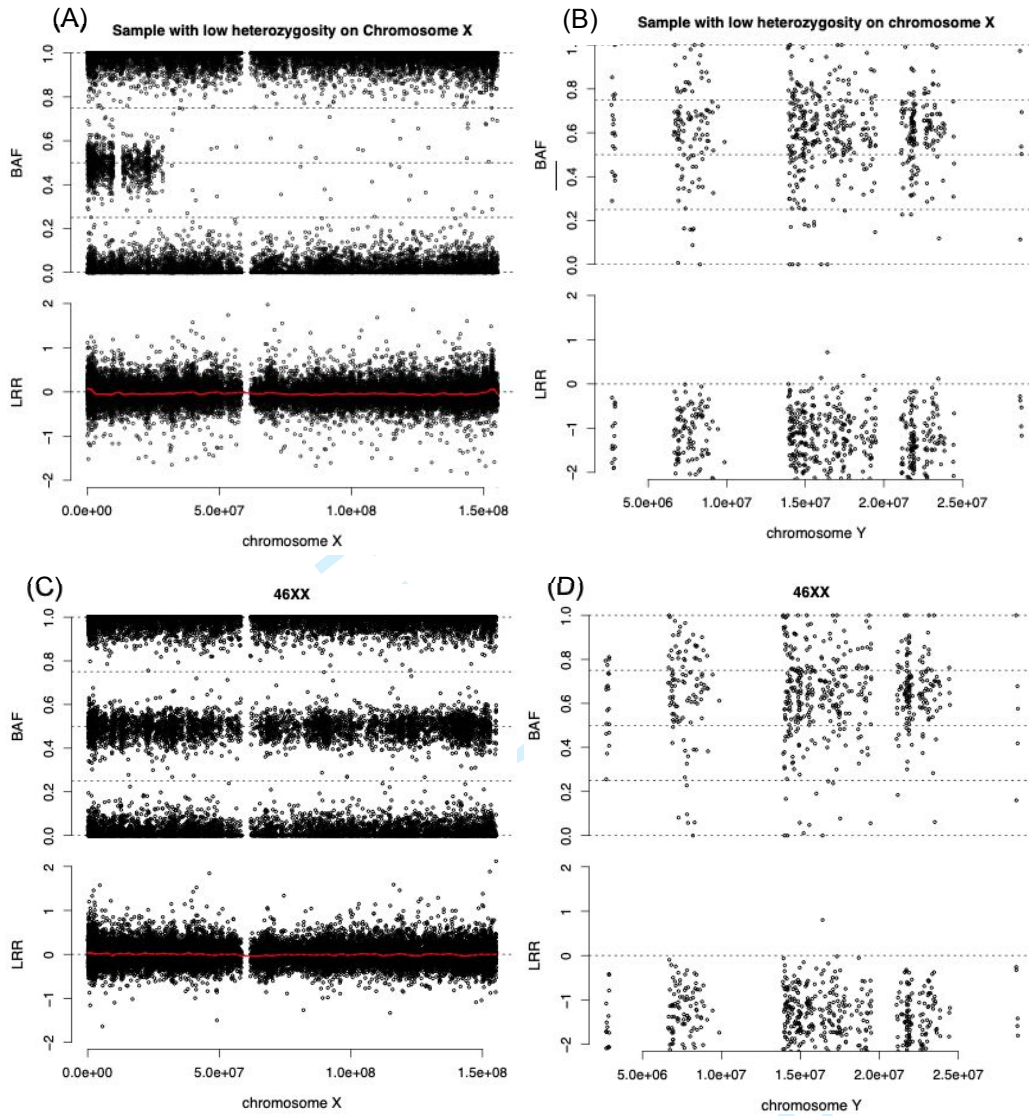

**Supplementary Figure S7:** BAF (TOP) and log<sub>2</sub> ratio (BOTTOM) of chromosomes X (A) and Y (B) are shown for sample with low heterozygosity on chromosome X compared to sample with 46,XX (C-D).

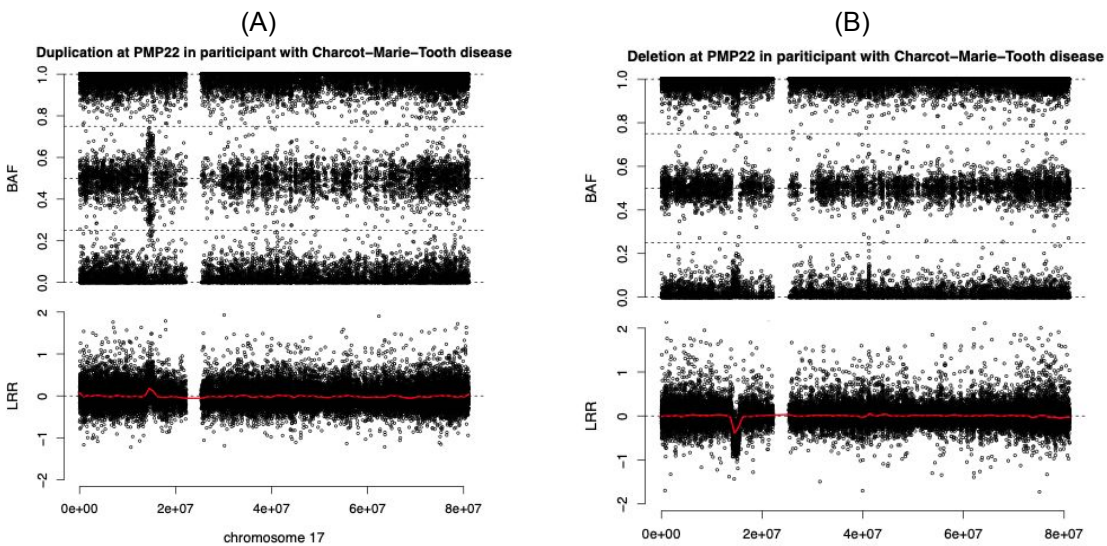

22 **Supplementary Figure S8:** BAF (TOP) and log<sub>2</sub> ratio (BOTTOM) of chromosome 17 are shown for  
23 sample with duplication (A) or deletion (B) at *PMP22* locus.  
24  
25  
26  
27  
28  
29  
30  
31  
32  
33  
34  
35  
36  
37  
38  
39  
40  
41  
42  
43  
44  
45  
46  
47  
48  
49  
50  
51  
52  
53  
54  
55  
56  
57  
58  
59  
60



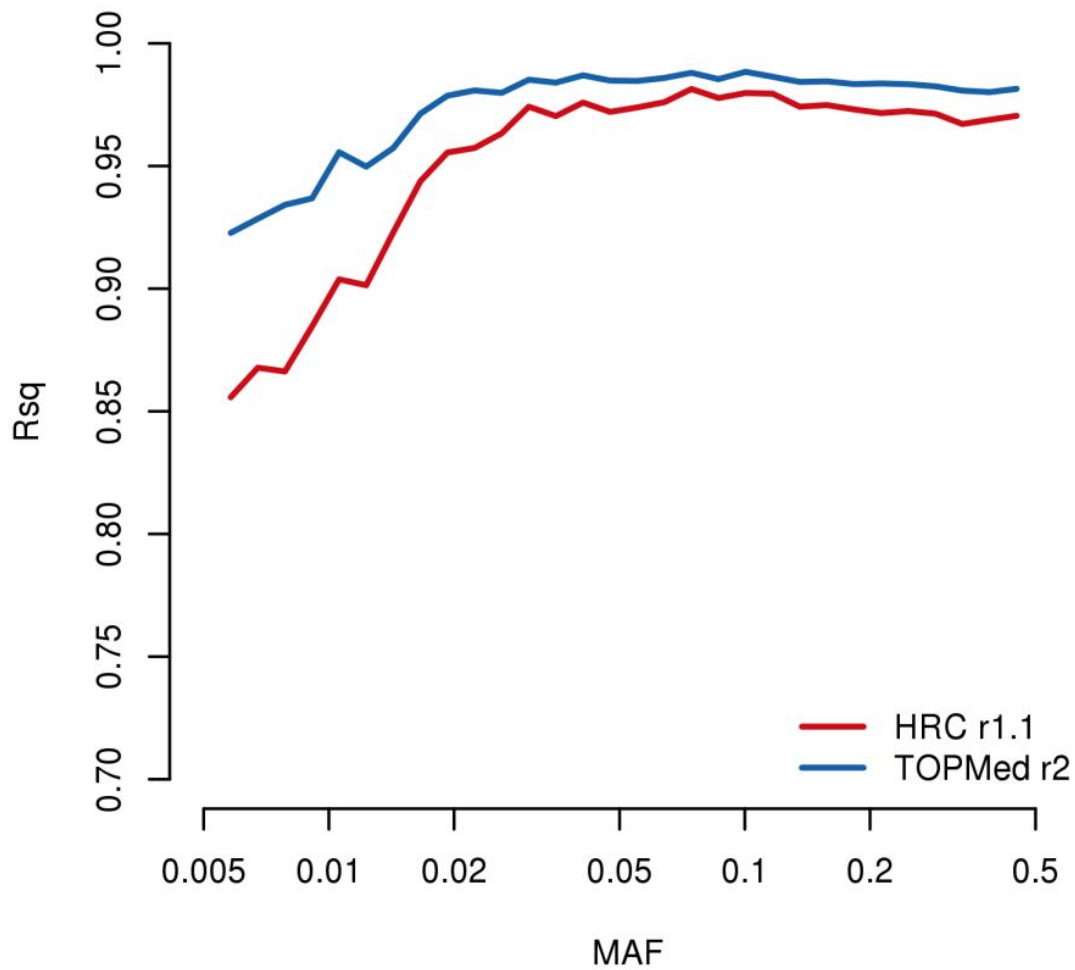

**Supplementary Figure S9:** Imputation quality of the CLSA cohort using the TOPMed versus Haplotype Reference Consortium (HRC) reference panel stratified by minor allele frequency (MAF) bins (data shown is from chromosome 22).

**Supplementary Table S1:** Sex chromosome determination of miscalled genotyped CLSA participant

| Self reported sex | Affymetrix sex corrected by SVM | PLINK sex (raw F estimate <0.3 female raw F estimate >0.8 male) | discordance in section Sex chromosome composition | PLINK sex (adjusted F estimate <0.4 female adjusted F estimate >0.8 male) | sex determined by combined Affymetrix/P LINK/CNV approach | CLSA self-reported phenotype |
|-------------------|---------------------------------|-----------------------------------------------------------------|---------------------------------------------------|---------------------------------------------------------------------------|-----------------------------------------------------------|------------------------------|
| male              | female                          | female                                                          |                                                   | 1 female                                                                  | female                                                    |                              |
| male              | male                            | female                                                          |                                                   | 1 female                                                                  | male                                                      |                              |
| female            | male                            | male                                                            |                                                   | 1 male                                                                    | male                                                      |                              |
| male              | female                          | female                                                          |                                                   | 1 female                                                                  | female                                                    |                              |
| female            | female                          | unknown                                                         |                                                   | female                                                                    | female                                                    |                              |
| female            | female                          | unknown                                                         |                                                   | 1 unknown                                                                 | female                                                    |                              |
| female            | female                          | unknown                                                         |                                                   | 1 unknown                                                                 | female                                                    |                              |
| female            | female                          | unknown                                                         |                                                   | 1 unknown                                                                 | female                                                    |                              |
| male              | female                          | female                                                          |                                                   | 1 female                                                                  | female                                                    |                              |
| female            | male                            | male                                                            |                                                   | 1 male                                                                    | male                                                      |                              |
| female            | male                            | male                                                            |                                                   | 1 male                                                                    | male                                                      |                              |
| male              | female                          | female                                                          |                                                   | 1 female                                                                  | female                                                    |                              |
| female            | female                          | male                                                            |                                                   | 1 male                                                                    | female                                                    | Turner Syndrc                |
| female            | male                            | male                                                            |                                                   | 1 male                                                                    | male                                                      |                              |
| female            | female                          | unknown                                                         |                                                   | female                                                                    | female                                                    |                              |
| male              | female                          | female                                                          |                                                   | 1 female                                                                  | female                                                    |                              |
| female            | male                            | male                                                            |                                                   | 1 male                                                                    | male                                                      |                              |
| male              | male                            | unknown                                                         |                                                   | 1 female                                                                  | male                                                      |                              |
| female            | male                            | male                                                            |                                                   | 1 male                                                                    | male                                                      |                              |
| male              | male                            | unknown                                                         |                                                   | 1 unknown                                                                 | male                                                      |                              |
| male              | male                            | unknown                                                         |                                                   | 1 unknown                                                                 | male                                                      |                              |
| female            | female                          | male                                                            |                                                   | 1 male                                                                    | female                                                    |                              |
| female            | male                            | male                                                            |                                                   | 1 male                                                                    | male                                                      |                              |
| male              | female                          | female                                                          |                                                   | 1 female                                                                  | female                                                    |                              |
| female            | female                          | male                                                            |                                                   | 1 male                                                                    | female                                                    |                              |
| male              | male                            | unknown                                                         |                                                   | male                                                                      | male                                                      |                              |
| female            | female                          | unknown                                                         |                                                   | 1 unknown                                                                 | female                                                    |                              |
| male              | female                          | male                                                            |                                                   | male                                                                      | female                                                    |                              |
| female            | female                          | unknown                                                         |                                                   | 1 unknown                                                                 | female                                                    |                              |
| male              | female                          | male                                                            |                                                   | male                                                                      | male                                                      |                              |
| female            | female                          | male                                                            |                                                   | 1 unknown                                                                 | female                                                    |                              |
| female            | male                            | male                                                            |                                                   | 1 male                                                                    | male                                                      |                              |
| female            | male                            | unknown                                                         |                                                   | 1 male                                                                    | female                                                    | Turner Syndrc                |
| male              | male                            | female                                                          |                                                   | 1 female                                                                  | male                                                      |                              |
| female            | female                          | male                                                            |                                                   | 1 male                                                                    | female                                                    |                              |
| female            | female                          | unknown                                                         |                                                   | female                                                                    | female                                                    |                              |

|    |        |        |         |           |        |                 |
|----|--------|--------|---------|-----------|--------|-----------------|
| 1  |        |        |         |           |        |                 |
| 2  | male   | male   | unknown | 1 unknown | male   |                 |
| 3  | male   | male   | female  | 1 female  | male   | Klinefelter Syr |
| 4  | female | male   | male    | 1 male    | male   |                 |
| 5  |        |        |         |           |        |                 |
| 6  | male   | male   | unknown | 1 female  | male   |                 |
| 7  | male   | female | male    | male      | male   |                 |
| 8  | female | female | male    | 1 male    | female | Turner Syndrc   |
| 9  |        |        |         |           |        |                 |
| 10 | female | female | unknown | female    | female |                 |
| 11 | female | female | unknown | 1 unknown | female |                 |
| 12 | male   | male   | unknown | male      | male   |                 |
| 13 |        |        |         |           |        |                 |
| 14 | female | female | unknown | female    | female |                 |
| 15 | female | female | unknown | 1 unknown | female |                 |
| 16 | female | female | unknown | female    | female |                 |
| 17 |        |        |         |           |        |                 |
| 18 | male   | male   | unknown | 1 unknown | male   |                 |
| 19 | male   | female | male    | male      | male   |                 |
| 20 | female | female | unknown | 1 unknown | female |                 |
| 21 |        |        |         |           |        |                 |
| 22 | male   | female | female  | 1 female  | female |                 |
| 23 | female | female | unknown | female    | female |                 |
| 24 | female | male   | male    | 1 male    | male   |                 |
| 25 |        |        |         |           |        |                 |
| 26 | male   | female | female  | 1 female  | female |                 |
| 27 | male   | male   | female  | 1 female  | male   | Klinefelter Syr |
| 28 | female | female | unknown | 1 unknown | female |                 |
| 29 |        |        |         |           |        |                 |
| 30 | female | female | unknown | female    | female |                 |
| 31 | male   | female | female  | 1 female  | female |                 |
| 32 | male   | female | female  | 1 female  | female |                 |
| 33 |        |        |         |           |        |                 |
| 34 | female | male   | male    | 1 male    | male   |                 |
| 35 | male   | female | male    | male      | male   |                 |
| 36 | male   | male   | unknown | 1 unknown | male   |                 |
| 37 |        |        |         |           |        |                 |
| 38 |        |        |         |           |        |                 |
| 39 |        |        |         |           |        |                 |
| 40 |        |        |         |           |        |                 |
| 41 |        |        |         |           |        |                 |
| 42 |        |        |         |           |        |                 |
| 43 |        |        |         |           |        |                 |
| 44 |        |        |         |           |        |                 |
| 45 |        |        |         |           |        |                 |
| 46 |        |        |         |           |        |                 |
| 47 |        |        |         |           |        |                 |
| 48 |        |        |         |           |        |                 |
| 49 |        |        |         |           |        |                 |
| 50 |        |        |         |           |        |                 |
| 51 |        |        |         |           |        |                 |
| 52 |        |        |         |           |        |                 |
| 53 |        |        |         |           |        |                 |
| 54 |        |        |         |           |        |                 |
| 55 |        |        |         |           |        |                 |
| 56 |        |        |         |           |        |                 |
| 57 |        |        |         |           |        |                 |
| 58 |        |        |         |           |        |                 |
| 59 |        |        |         |           |        |                 |
| 60 |        |        |         |           |        |                 |

s

| chromosomal<br>abnormality<br>from CNV<br>profile | Raw F<br>estimate | Adjusted F<br>estimate |
|---------------------------------------------------|-------------------|------------------------|
| No abnormality                                    | -0.00301          | 0.01745                |
| Klinefelter Sync                                  | 0.1048            | 0.1002                 |
| No abnormality                                    | 1                 | 1                      |
| No abnormality                                    | 0.01533           | 0.02791                |
| Low heterozygous                                  | 0.3495            | 0.3644                 |
| 45,X/46,XX mosaic                                 | 0.5095            | 0.4773                 |
| Low heterozygous                                  | 0.4637            | 0.4485                 |
| Low heterozygous                                  | 0.4352            | 0.4746                 |
| No abnormality                                    | 0.008892          | 0.03223                |
| No abnormality                                    | 1                 | 1                      |
| No abnormality                                    | 1                 | 1                      |
| No abnormality                                    | -0.03065          | -0.02794               |
| Turner Syndrom                                    | 0.9507            | 0.9614                 |
| No abnormality                                    | 1                 | 1                      |
| Low heterozygous                                  | 0.3043            | 0.2802                 |
| No abnormality                                    | -0.002689         | -0.01603               |
| No abnormality                                    | 1                 | 1                      |
| Klinefelter Sync                                  | 0.3124            | 0.3235                 |
| No abnormality                                    | 1                 | 1                      |
| No abnormality                                    | 0.6854            | 0.6878                 |
| 45,X/46,XY mosaic                                 | 0.5798            | 0.5893                 |
| Turner Syndrom                                    | 0.9792            | 0.9875                 |
| No abnormality                                    | 1                 | 1                      |
| No abnormality                                    | 0.04474           | 0.03819                |
| Turner Syndrom                                    | 0.9439            | 0.9545                 |
| 45,X/46,XY mosaic                                 | 0.7965            | 0.8497                 |
| Low heterozygous                                  | 0.4524            | 0.4305                 |
| 45,X/46,XY mosaic                                 | 0.9748            | 0.986                  |
| Low heterozygous                                  | 0.5457            | 0.5504                 |
| 45,X/46,XY mosaic                                 | 0.9678            | 0.9797                 |
| Low heterozygous                                  | 0.8076            | 0.7966                 |
| No abnormality                                    | 1                 | 1                      |
| 45,X/46,XY mosaic                                 | 0.7827            | 0.8404                 |
| Klinefelter Sync                                  | -0.0457           | -0.04304               |
| Turner Syndrom                                    | 0.879             | 0.9028                 |
| Low heterozygous                                  | 0.3035            | 0.3339                 |

|    |                  |           |           |
|----|------------------|-----------|-----------|
| 1  |                  |           |           |
| 2  | 45,X/46,XY mos   | 0.6732    | 0.7016    |
| 3  | Klinefelter Sync | -0.03886  | -0.02651  |
| 4  | No abnormality   | 1         | 1         |
| 5  |                  |           |           |
| 6  | Klinefelter Sync | 0.3093    | 0.2872    |
| 7  | 45,X/46,XY mos   | 1         | 0.9603    |
| 8  | Turner Syndron   | 0.9273    | 0.9527    |
| 9  |                  |           |           |
| 10 | Low heterozygc   | 0.4004    | 0.3584    |
| 11 | Low heterozygc   | 0.3838    | 0.4362    |
| 12 | 45,X/46,XY mos   | 0.7707    | 0.8358    |
| 13 |                  |           |           |
| 14 | Low heterozygc   | 0.3978    | 0.3886    |
| 15 | Low heterozygc   | 0.7748    | 0.7842    |
| 16 | No abnormality   | 0.3298    | 0.3527    |
| 17 | 45,X/46,XY mos   | 0.6658    | 0.7601    |
| 18 | 45,X/46,XY mos   | 1         | 0.9827    |
| 19 | 45,X/46,XY mos   | 1         | 0.9827    |
| 20 | 45,X/46,XX mos   | 0.4148    | 0.4228    |
| 21 |                  |           |           |
| 22 | No abnormality   | -0.003668 | -0.01753  |
| 23 | Low heterozygc   | 0.3489    | 0.2975    |
| 24 | No abnormality   | 1         | 1         |
| 25 | No abnormality   | -0.02345  | -0.01932  |
| 26 |                  |           |           |
| 27 | Klinefelter Sync | -0.03581  | -0.02924  |
| 28 | 45,X/46,XX mos   | 0.5139    | 0.5022    |
| 29 |                  |           |           |
| 30 | Low heterozygc   | 0.3461    | 0.3336    |
| 31 | No abnormality   | 0.01936   | -0.006017 |
| 32 | No abnormality   | -0.04206  | -0.0411   |
| 33 |                  |           |           |
| 34 | No abnormality   | 1         | 1         |
| 35 | 45,X/46,XY mos   | 0.9756    | 0.9832    |
| 36 | 45,X/46,XY mos   | 0.72      | 0.7971    |
| 37 |                  |           |           |
| 38 |                  |           |           |
| 39 |                  |           |           |
| 40 |                  |           |           |
| 41 |                  |           |           |
| 42 |                  |           |           |
| 43 |                  |           |           |
| 44 |                  |           |           |
| 45 |                  |           |           |
| 46 |                  |           |           |
| 47 |                  |           |           |
| 48 |                  |           |           |
| 49 |                  |           |           |
| 50 |                  |           |           |
| 51 |                  |           |           |
| 52 |                  |           |           |
| 53 |                  |           |           |
| 54 |                  |           |           |
| 55 |                  |           |           |
| 56 |                  |           |           |
| 57 |                  |           |           |
| 58 |                  |           |           |
| 59 |                  |           |           |
| 60 |                  |           |           |

**Supplementary Table S2: Self-reported ancestry and derived category from cultural and racial back**

## Self-reported Category

|               |                 |
|---------------|-----------------|
| Arab          | Arab            |
| West Asian    | Arab            |
| Black         | Black           |
| Chinese       | East Asian      |
| Japanese      | East Asian      |
| Korean        | East Asian      |
| Latin America | Latino          |
| Don't know    | Other           |
| Mixed         | Mixed           |
| Other         | Other           |
| Refused       | Other           |
| South Asian   | South Asian     |
| Filipino      | Southeast Asian |
| Southeast Asi | Southeast Asian |
| White         | White           |

1  
2 background  
3  
4  
5  
6  
7  
8  
9  
10  
11  
12  
13  
14  
15  
16  
17  
18  
19  
20  
21  
22  
23  
24  
25  
26  
27  
28  
29  
30  
31  
32  
33  
34  
35  
36  
37  
38  
39  
40  
41  
42  
43  
44  
45  
46  
47  
48  
49  
50  
51  
52  
53  
54  
55  
56  
57  
58  
59  
60

For peer review only

**Supplementary Table S3:** Comparison of HLA types in positive controls with known types in literature

| HLA locus | NA10859 (134NA10859 (134NA10859 (1347-02)                         | NA12878 (146NA12878 (146     |
|-----------|-------------------------------------------------------------------|------------------------------|
|           | Reference GeiNo of replicatiAccuracy(%)/Call rate(%) <sup>d</sup> | Reference GeiNo of replicati |
| A         | 03:01/01:01 <sup>b</sup> 4 100/100                                | 01:01/11:01 <sup>e</sup> 587 |
| B         | 07:02/15:01 <sup>b</sup> 4 100/100                                | 08:01/56:01 <sup>e</sup> 587 |
| C         | 06:02/07:02 <sup>b</sup> 4 100/100                                | 01:02/07:01 <sup>e</sup> 587 |
| DPA1      | 01:03/01:03 <sup>b</sup> 4 100/100                                | 01:03/02:01 <sup>e</sup> 587 |
| DPB1      | 04:02/04:02 <sup>b</sup> 4 100/100                                | 04:01/14:01 <sup>e</sup> 587 |
| DQA1      | 01:02/03:01 <sup>b</sup> 4 100/100                                | 01:01/05:01 <sup>e</sup> 587 |
| DQB1      | 03:02/06:02 <sup>b</sup> 4 100/100                                | 02:01/05:01 <sup>e</sup> 587 |
| DRB1      | 04:01/15:01 <sup>b</sup> 4 100/100                                | 01:01/03:01 <sup>e</sup> 587 |
| DRB3      | NA <sup>b,c</sup> 4 -                                             | 01:01/01:01;0 587            |
| DRB4      | 01 <sup>b</sup> 4 100/100                                         | 01:01/01:01;0 587            |
| DRB5      | Na <sup>b,c</sup> 4 -                                             | NA <sup>e</sup> 587          |

Note: a-Coriell ID (CEPH Family ID or NIST ID/RM Number for Personal Genome Project sample)

b: reference genotype source-IPD-IMGT/HLA Database

c: reference genotype data is not available

d: call rate is based on a posterior probability call threshold of 0.7

e: reference genotype source-PLoS Comput Biol. 2016 Oct; 12(10): e1005151. PMID: 27792722. A s

f: reference genotype source-DOI: 10.12688/f1000research.19630.1

g: reference genotype source-DOI: 10.12688/f1000research.19630.1 and <https://www.pacb.com/>v

h: reference genotype source-DOI: 10.12688/f1000research.19630.1 and Nature Communications



| NA12878 (1463-02) | NA24385 (HG NA24385 (HG NA24385 (HG002) | Accuracy(%) / Call rate(%) | Reference Gen | No of replicat | Accuracy(%) / Call rate(%) |
|-------------------|-----------------------------------------|----------------------------|---------------|----------------|----------------------------|
| 100/100           | 26:01/01:01 <sup>f</sup>                | 75                         | 100/100       |                |                            |
| 100/100           | 38:01/35:08 <sup>f</sup>                | 75                         | -             |                |                            |
| 100/100           | 12:03/04:01 <sup>f</sup>                | 75                         | 100/100       |                |                            |
| 100/100           | 01:03/01:03 <sup>f</sup>                | 75                         | 100/100       |                |                            |
| 100/100           | 04:01/04:01 <sup>g</sup>                | 75                         | 100/100       |                |                            |
| 100/100           | 03:01/01:01 <sup>h</sup>                | 75                         | 100/100       |                |                            |
| 100/100           | 05:01/03:02 <sup>f</sup>                | 75                         | 100/100       |                |                            |
| 100/100           | 04:02/10:01 <sup>f</sup>                | 75                         | 100/100       |                |                            |
| 100/100           | NA <sup>f</sup>                         | 75                         | -             |                |                            |
| -                 | 01:03 <sup>f</sup>                      | 75                         | 100/100       |                |                            |
| -                 | NA <sup>f</sup>                         | 75                         | -             |                |                            |

set of possible alleles are reported in the reference. The HLA types we validated are shown in the ta

mp-content/uploads/Rowell-CSHLBioData-2018-Comprehensive-Variant-Detection-in-a-Human-Gen  
doi: 10.1038/s41467-020-18564-9. The HLA types we validated are shown in the table.

1  
2  
3  
4  
5  
6  
7  
8  
9  
10  
11  
12  
13  
14  
15  
16  
17  
18  
19  
20  
21  
22  
23  
24  
25  
26  
27  
28  
29  
30  
31  
32  
33  
34  
35  
36  
37  
38  
39  
40  
41  
42  
43  
44  
45  
46  
47  
48  
49  
50  
51  
52  
53  
54  
55  
56  
57  
58  
59  
60

For peer review only

ible.

ome-with-PacBio-High-Fidelity-Reads.pdf. The HLA types we validated are shown in the table.

# BMJ Open

## Cohort Profile: Genomic data for 26,622 individuals from the Canadian Longitudinal Study on Aging (CLSA)

|                                 |                                                                                                                                                                                                                                                                                                                                                                                                                                                                                                                                                                                                                                                                                                                                                                                                                                                                                                                                                                                                                                                                             |
|---------------------------------|-----------------------------------------------------------------------------------------------------------------------------------------------------------------------------------------------------------------------------------------------------------------------------------------------------------------------------------------------------------------------------------------------------------------------------------------------------------------------------------------------------------------------------------------------------------------------------------------------------------------------------------------------------------------------------------------------------------------------------------------------------------------------------------------------------------------------------------------------------------------------------------------------------------------------------------------------------------------------------------------------------------------------------------------------------------------------------|
| Journal:                        | <i>BMJ Open</i>                                                                                                                                                                                                                                                                                                                                                                                                                                                                                                                                                                                                                                                                                                                                                                                                                                                                                                                                                                                                                                                             |
| Manuscript ID                   | bmjopen-2021-059021.R1                                                                                                                                                                                                                                                                                                                                                                                                                                                                                                                                                                                                                                                                                                                                                                                                                                                                                                                                                                                                                                                      |
| Article Type:                   | Cohort profile                                                                                                                                                                                                                                                                                                                                                                                                                                                                                                                                                                                                                                                                                                                                                                                                                                                                                                                                                                                                                                                              |
| Date Submitted by the Author:   | 07-Feb-2022                                                                                                                                                                                                                                                                                                                                                                                                                                                                                                                                                                                                                                                                                                                                                                                                                                                                                                                                                                                                                                                                 |
| Complete List of Authors:       | Forgetta, Vince; Jewish General Hospital, Centre for Clinical Epidemiology<br>Li, Rui; McGill University,<br>Darmond-Zwaig, Corinne; McGill University<br>Belisle, Alexandre; McGill University<br>Balion, Cynthia; McMaster University, Pathology and Molecular Medicine<br>Roshandel, Delnaz; The Hospital for Sick Children, Peter Gilgan Centre for Research and Learning<br>Wolfson, Christina; McGill University<br>Lettre, Guillaume; Université de Montréal; Montreal Heart Institute<br>Pare, Guillaume ; McMaster University<br>Paterson, Andrew; Hospital for Sick Children,<br>Griffith, Lauren; McMaster University, Department of Health Research Methods, Evidence, and Impact<br>Verschoor, Chris; McMaster University,<br>Lathrop, Mark; McGill University, Department of Human Genetics<br>Kirkland, Susan ; Dalhousie University,<br>Raina, Parminder; McMaster University, Clinical Epidemiology and Biostatistics<br>Richards, Brent ; McGill University,<br>Ragoussis, Jiannis; McGill University, Department of Human Genetics; McGill Genome Centre |
| <b>Primary Subject Heading</b>: | Genetics and genomics                                                                                                                                                                                                                                                                                                                                                                                                                                                                                                                                                                                                                                                                                                                                                                                                                                                                                                                                                                                                                                                       |
| Secondary Subject Heading:      | Genetics and genomics, Epidemiology, Public health, Qualitative research                                                                                                                                                                                                                                                                                                                                                                                                                                                                                                                                                                                                                                                                                                                                                                                                                                                                                                                                                                                                    |
| Keywords:                       | GENETICS, EPIDEMIOLOGY, PUBLIC HEALTH, Risk management < HEALTH SERVICES ADMINISTRATION & MANAGEMENT, Health informatics < BIOTECHNOLOGY & BIOINFORMATICS, Glaucoma < OPHTHALMOLOGY                                                                                                                                                                                                                                                                                                                                                                                                                                                                                                                                                                                                                                                                                                                                                                                                                                                                                         |
|                                 |                                                                                                                                                                                                                                                                                                                                                                                                                                                                                                                                                                                                                                                                                                                                                                                                                                                                                                                                                                                                                                                                             |

SCHOLARONE™  
Manuscripts



I, the Submitting Author has the right to grant and does grant on behalf of all authors of the Work (as defined in the below author licence), an exclusive licence and/or a non-exclusive licence for contributions from authors who are: i) UK Crown employees; ii) where BMJ has agreed a CC-BY licence shall apply, and/or iii) in accordance with the terms applicable for US Federal Government officers or employees acting as part of their official duties; on a worldwide, perpetual, irrevocable, royalty-free basis to BMJ Publishing Group Ltd ("BMJ") its licensees and where the relevant Journal is co-owned by BMJ to the co-owners of the Journal, to publish the Work in this journal and any other BMJ products and to exploit all rights, as set out in our [licence](#).

The Submitting Author accepts and understands that any supply made under these terms is made by BMJ to the Submitting Author unless you are acting as an employee on behalf of your employer or a postgraduate student of an affiliated institution which is paying any applicable article publishing charge ("APC") for Open Access articles. Where the Submitting Author wishes to make the Work available on an Open Access basis (and intends to pay the relevant APC), the terms of reuse of such Open Access shall be governed by a Creative Commons licence – details of these licences and which [Creative Commons](#) licence will apply to this Work are set out in our licence referred to above.

Other than as permitted in any relevant BMJ Author's Self Archiving Policies, I confirm this Work has not been accepted for publication elsewhere, is not being considered for publication elsewhere and does not duplicate material already published. I confirm all authors consent to publication of this Work and authorise the granting of this licence.

1  
2  
3 **Cohort Profile: Genomic data for 26,622 individuals from the Canadian Longitudinal**  
4 **Study on Aging (CLSA)**  
5  
6  
7

8  
9 **Author List:**  
10

11 Vincenzo Forgetta<sup>1†</sup>, Rui Li<sup>2†</sup>, Corinne Darmond-Zwaig<sup>2</sup>, Alexandre Belisle<sup>2</sup>, Cynthia Balion<sup>3</sup>,

12 Delnaz Roshandel<sup>4</sup>, Christina Wolfson<sup>5</sup>, Guillaume Lettre<sup>6</sup>, Guillaume Pare<sup>3</sup>, Andrew D.

13 Paterson<sup>4,7,8</sup>, Lauren E. Griffith<sup>9</sup>, Chris Verschoor<sup>9</sup>, Mark Lathrop<sup>2</sup>, Susan Kirkland<sup>10</sup>, Parminder

14 Raina<sup>9‡</sup>, J. Brent Richards<sup>1,5,11,12‡</sup>, and Jiannis Ragoussis<sup>2,12,13‡</sup>  
15  
16  
17

18 1 Centre for Clinical Epidemiology, Lady Davis Institute, Jewish General Hospital, Montréal, QC,  
19 Canada,  
20  
21  
22

23 2 McGill University Genome Centre, Department of Human Genetics, McGill University,  
24 Montréal, QC, Canada,  
25  
26  
27

28 3 Hamilton Regional Laboratory Medicine Program, McMaster University, St. Joseph's Hospital  
29 St. Luke's Wing, Hamilton, ON, Canada,  
30  
31

32 4 Genetics & Genomic Biology, The Hospital for Sick Children Research Institute, The Hospital  
33 for Sick Children, Toronto, ON, Canada,  
34  
35

36 5 Department of Medicine, & of Epidemiology and Biostatistics and Occupational Health, McGill  
37 University, Montréal, QC, Canada,  
38  
39

40 6 Montréal Heart Institute and Université de Montréal, Montréal, QC, Canada,  
41  
42

43 7 Dalla Lana School of Public Health, University of Toronto, Toronto, ON, Canada,  
44

45 8 <https://orcid.org/0000-0002-9169-118X>  
46

47 9 Department of Health Research Methods, Evidence, and Impact, McMaster University,  
48 Hamilton, ON, Canada,  
49

50 10 Department of Community Health and Epidemiology, Division of Geriatric Medicine,  
51 Dalhousie University, Halifax, Nova Scotia, Canada,  
52  
53  
54  
55  
56  
57  
58  
59  
60

1  
2  
3 11 Department of Twin Research and Genetic Epidemiology, King's College London, London,  
4  
5 UK,

6  
7 12 Department of Human Genetics, McGill University, Montréal, QC, Canada,

8  
9 13 Department of Bioengineering, McGill University, Montréal, QC, Canada,

10  
11 \* Corresponding author. McGill Genome Centre, 740 Avenue Dr. Penfield, Montreal, Québec,  
12  
13 Canada H3A 0G1. Email: [ioannis.ragoussis@mcgill.ca](mailto:ioannis.ragoussis@mcgill.ca).

14  
15 † Joint first authors.

16  
17 ‡ Joint senior authors.

18  
19  
20  
21  
22 **Keyword:** CLSA, genome-wide genotyping, aging, HLA

23  
24 **Word count:** 4,435

## 25 26 27 28 **Abstract**

29  
30 **Purpose:** The Canadian Longitudinal Study on Aging (CLSA) Comprehensive cohort was  
31  
32 established to provide unique opportunities to study the genetic and environmental contributions  
33  
34 to human disease as well as aging process. The aim of this report is to describe the genomic  
35  
36 data included in CLSA.

37  
38 **Participants:** A total of 26,622 individuals from CLSA comprehensive cohort of men and  
39  
40 women aged 45 to 85 recruited between 2010 and 2015 have undergone genome-wide  
41  
42 genotyping of DNA samples collected from blood. Comprehensive quality control metrics were  
43  
44 measured for genetic markers and samples respectively. The genotypes were imputed to the  
45  
46 TOPMed reference panel. Sex chromosome abnormalities were identified by copy number  
47  
48 profiling. Classical HLA genes haplotypes were imputed at two-field (four-digit).

49  
50 **Findings to date:** Of the 26,622 genotyped participants, 24,655 (92.6%) were identified as  
51  
52 having European ancestry. This genomic data is linked to physical, lifestyle, medical, economic,  
53  
54 environmental, and psychosocial factors collected longitudinally in CLSA. The combined  
55  
56  
57  
58  
59  
60

1  
2  
3 analysis including CLSA genomic data uncovered over 100 novel loci associated with key  
4 parameters to define glaucoma. The CLSA genomic dataset validated the contribution of a  
5 polygenic risk score to screen individuals with high fracture risk. It is also a valuable resource to  
6 directly identify common genetic variations associated with conditions related to complex traits.  
7  
8 Taking advantage of the comprehensive interview and physical information collected in CLSA,  
9 this genomic dataset has been linked to psychosocial factors to investigate both the  
10 independent and interactive effects on cardiovascular disease.  
11  
12

13  
14 **Future plans:** The CLSA overall is ongoing. Follow-up data will continue to be collected from  
15 participants in the current genomic subcohort including the DNA methylation and metabolomic  
16 data. Ongoing studies focus on elucidating the role of genetic factors in cognitive decline and  
17 cardiovascular diseases. This genomic data resource is available upon request through the  
18 CLSA data access application process.  
19  
20  
21  
22  
23  
24  
25  
26  
27  
28  
29

### 30 **Strengths and limitations of this study**

- 31  
32 • The genomic data in Canadian Longitudinal Study on Aging (CLSA) Comprehensive  
33 cohort provides whole-genome genotyping data on 794,409 markers and whole-genome  
34 imputed data on approximately 308 million genetic variants.  
35  
36
- 37 • The UK Biobank array used for genotyping is enriched with markers associated with  
38 multiple phenotypes including the comprehensive pharmacogenomic and inflammation  
39 markers which may be of particular interest since DNA methylation, metabolomic and  
40 proteomic data are being generated by CLSA.  
41  
42
- 43 • The CLSA cohort continues to follow up the participants on a wide spectrum of  
44 qualitative and quantitative variables; it will facilitate research on the effect of interplay  
45 between genetics and environmental factors on age-related diseases.  
46  
47
- 48 • Potential limitations may include the relatively lower genotyping coverage in participants  
49 with non-European ancestry, which can be substantially improved by using imputation  
50  
51  
52  
53  
54  
55  
56  
57  
58  
59  
60

1  
2  
3 reference panel with high diversity and inadequate power to discover very rare  
4  
5 predisposition variants.  
6  
7  
8

## 9 **Introduction**

10  
11 The global life expectancy increased dramatically through the past two hundred years. In such  
12  
13 times, the make-up of Canadian population has changed unprecedentedly. From 1977 to 2017,  
14  
15 the senior population, i.e., people aged 65 years and older, grew from 2 million to 6.2 million,  
16  
17 which equaled to nearly 17% of its population size. This number is still rapidly rising. It is  
18  
19 anticipated that by 2036 there will be 10.2 million senior people in Canada. Of every 4  
20  
21 Canadians, there will be one senior person.  
22  
23

24 Along with the expanded human life expectancy, the prevalence of age-related diseases is  
25  
26 strikingly increasing. Aged people experience progressive decline in functional integrity and  
27  
28 homeostasis. This process is accompanied by increased risk of neurodegeneration,  
29  
30 cardiovascular disease and cancer among many other diseases, which have become the most  
31  
32 common causes of decreased life quality and late-life mortality. It adds substantial burden to  
33  
34 individual and social health care system inadvertently. Age-related diseases have a highly  
35  
36 complex nature. Both the genetic and environmental factors play an important role as well as  
37  
38 the interaction between them<sup>1 2</sup>. Therefore, understanding of the underlying mechanisms of  
39  
40 aging is required for sustaining longer lives with reduced loss of healthy years.  
41  
42

43 Studies on short-lived model organisms provided insights on several key genetical regulators in  
44  
45 hallmark aging pathways, however, the identification of biomarkers of age and age-related  
46  
47 disease in human is more complicated<sup>3</sup>. Over the past decades, genetic epidemiology methods  
48  
49 emerged to be a powerful tool. The genome-wide association studies (GWASs) have uncovered  
50  
51 tens of genes and genetic variations that play a role in the variability of aging outcomes among  
52  
53 people<sup>4</sup>. However, the genetic effects are usually relatively moderate and can be altered by  
54  
55 lifestyle and other environmental determinants<sup>2 5</sup>. More work is needed to fully deconvolute the  
56  
57  
58  
59  
60



1  
2  
3 interplay between genetics and extrinsic influences. This effort will be benefited by larger  
4  
5 sample size and linked information on proteomics and epigenetics.  
6  
7

### 8 9 **Cohort description**

10  
11 The Canadian Longitudinal Study on Aging (CLSA) is a national long-term study that recruited  
12  
13 51,338 men and women, aged 45-85 years at enrolment between 2010 and 2015 for baseline  
14  
15 data collection <sup>6</sup>. It presents a unique opportunity to study the genetic and environmental  
16  
17 contributions to human health and disease by providing information on the changing biological,  
18  
19 medical, psychological, social, lifestyle and economic aspects of participants' lives. It is  
20  
21 composed of two complementary cohorts: the Tracking cohort of 21,241 participants who were  
22  
23 interviewed by telephone and the Comprehensive cohort of 30,097 participants who were  
24  
25 interviewed in person and provided blood and urine samples. The participants in the  
26  
27 Comprehensive cohort were randomly selected from within 25-50 km of 11 data collection sites  
28  
29 in seven provinces. A total of 27,170 (90.3%) Comprehensive cohort participants provided blood  
30  
31 samples at baseline. The Comprehensive Cohort samples have been used to produce whole  
32  
33 genome genotyping data. The data were collected to understand, individually and in  
34  
35 combination, the impact of genetic variation in both maintaining health and in the development  
36  
37 of disease and disability as people age. In this release of the CLSA genomic data, 26,622  
38  
39 participants have been genotyped using the Affymetrix UK Biobank Axiom array <sup>7</sup>. Qualified  
40  
41 researchers from any country can access these genomic and phenotypic data via a formal data  
42  
43 and sample access procedure described on the CLSA website ([https://www.clsa-elcv.ca/data-](https://www.clsa-elcv.ca/data-access)  
44  
45 [access](https://www.clsa-elcv.ca/data-access)).  
46  
47  
48

### 49 ***Patient and public involvement***

50  
51 None.  
52  
53  
54  
55

### 56 **Data collected:**

### ***Sample storage and DNA extraction***

The CLSA protocol was reviewed and approved by 13 research ethics boards across Canada. All participants provided written informed consent<sup>8</sup>. The biological samples were collected at the Data Collection Sites and de-identified. Whole blood buffy coats were isolated from peripheral blood drawn and the plasma layer was removed. Samples were immediately moved to -80°C storage, and transferred to liquid N<sub>2</sub> storage at the CLSA Biorepository and Bioanalysis Centre up to one week later until shipment to the genomics facility, after which they were stored at -20°C. The time from blood collection to -80°C storage was under two hours for all participants. Genomic DNA was extracted from blood samples using the purification protocol “Chemagic DNA Buffy Coat Kit special 200µl prefilling VD151007” on the Chemagic MSM I instrument (Perkin-Elmer article No. CMG-533, Baesweiler, Germany). All extracted samples were quantified using PicoGreen Reagent Kit (Life Technologies, catalog # P7589). A minimum DNA concentration for passing of samples was set at 10 ng/µl. Samples were subsequently normalized to 20 ng/µl, except for those with a concentration of 10-20 ng/µl, which were used undiluted.

### ***Genotyping and calling***

Each plate genotyped contained 92 CLSA DNA samples and 4 controls, one male control as the Affymetrix Reference Genomic DNA 103 (Catalog# 900421) or Personal Genome Project sample huAA53E0 (Coriell Cell Repositories, catalog # NA24385), two female controls as the CEPH control 1463-02 (Coriell Cell Repositories, catalog # NA12878) or the CEPH control 1347-2 (Coriell Cell Repositories, catalog # NA10859), and a deionized water negative control. The Affymetrix protocol (Axiom 2.0 Assay Automated workflow on Affymetrix NIMBUS) was followed. Samples were hybridized to UK Biobank arrays (ThermoFisher Catalog #902502), the same array that was used to genotype ~450,000 individuals in the UK Biobank<sup>9</sup>. Axiom Array plates were processed on the Affymetrix GeneTitan Multi-Channel Instrument. For first pass quality control (QC), batches of 8 plates were analyzed using the Sample QC workflow

1  
2  
3 of the Axiom™ Analysis Suite 2.0 software where a subset of 20,000 reliable probes were used  
4 to determine the resolution of the AT and GC signal contrast (Dish QC) and sample QC. The  
5 reliable probes are autosomal, previously wet-lab tested by the provider, working probe sets  
6 with two array features per probe set.  
7  
8  
9

### 10 ***Genotyping quality control and removal of duplicate genotyped participants***

11  
12 Genotyping was undertaken in separate batches of approximately 5,000 samples each using  
13 Axiom™ Analysis Suite 2.0, similar to UK Biobank genotyping QC documentation <sup>7</sup>. Genotype  
14 calling resulted in 27,010 successfully genotyped DNA samples. An inclusion list containing  
15 794,409 genetic variants was used <sup>9</sup>, as well as the following QC parameters for selecting  
16 samples passing to further analysis: Dish QC  $\geq 0.82$  on sample level, and average QC call rate  
17 of passing samples on a plate (plate QC call rate)  $\geq 95\%$ , percentage of passing samples  $\geq$   
18 70%, and average call rate for passing samples  $\geq 95\%$  on plate-level. Duplicate genotyped  
19 participants were detected by KING version 2.1.3 <sup>10</sup> and the sample with higher genotype  
20 missingness was removed. This resulted in 26,622 successfully genotyped participants.  
21  
22  
23  
24  
25  
26  
27  
28  
29  
30  
31  
32  
33  
34  
35

### 36 ***Sex chromosome composition***

37  
38 Distribution of F estimates on the X chromosome showed a gap between 0.4 and 0.8  
39 ([Supplementary Figure S1](#)). Using this threshold, we obtained X chromosome number using  
40 PLINK version 1.90b4.4 <sup>11 12</sup>. F estimates for the 48 individuals with sex discrepancies between  
41 self-reported sex and X chromosome composition ([Table 1](#)) are listed in [Supplementary Table](#)  
42 [S1](#). All subsequent analyses in this paper will use X chromosome number and number of  
43 nonmissing Y chromosome genotypes to define sex.  
44  
45  
46  
47  
48  
49  
50

### 51 ***Genetic marker-based quality control***

1  
2  
3 This consisted of 4 tests intended to check for consistency of markers across various  
4 experimental factors, such as genotyping batch, participant sex, Hardy-Weinberg equilibrium  
5 (HWE), and discordance of genotyping across control replicates.  
6  
7

8  
9 The above tests require a population with relatively homogenous ancestry. Given this, we  
10 determined the largest subset of ancestrally homogeneous participants via K-means clustering  
11 of projected principal components from 414 individuals across 4 populations (Utah Residents  
12 (CEPH) with Northern and Western European Ancestry (CEU), Han Chinese in Beijing, China  
13 (CHB), Japanese in Tokyo, Japan (JPT) and Yoruba in Ibadan, Nigeria (YRI)) from 1000  
14 Genomes Phase 3<sup>13</sup>. The largest cluster across all genotype batches overlapped the CEU  
15 population and included 24,361 individuals, or 92% of the entire genotyped cohort (N=26,622)  
16 (Supplementary Figure S2).  
17  
18  
19  
20  
21  
22  
23  
24  
25  
26  
27

28 We then set a multiple-testing corrected p-value threshold for quality control tests as  $3.15 \times$   
29  $10^{-10}$ . For the 794,409 markers and 5 batches, this p-value cut-off can be considered as a  
30 family-wise error rate of 0.001 for each test. Since many tests may be positively correlated, the  
31 threshold is conservative and will identify markers with strong evidence of deviation from the null  
32 hypothesis. Single nucleotide polymorphisms (SNPs) that failed the tested QC parameters are  
33 flagged within the marker quality table provided with the data release. We thus invite  
34 researchers to filter markers based on these properties or devise their own quality control  
35 metrics that satisfy their research requirements.  
36  
37  
38  
39  
40  
41  
42  
43  
44

#### 45 *Discordant genotype frequency between batches*

46  
47 To detect deviation in genotype frequency of markers between batches, we used a Fisher's  
48 exact test on the 2x3 table of genotype counts (or 2x2 table for haploid markers). The vast  
49 majority of markers did not exhibit significant deviation in genotype frequency (779,656, 98.1%  
50 of total).  
51  
52  
53  
54

#### 55 *Departure from Hardy-Weinberg equilibrium*

1  
2  
3 We conducted the test for departure from HWE using the exact test<sup>14</sup>. There were 7,790  
4 markers with an HWE p-value  $< 3.15 \times 10^{-10}$ .

#### 5 6 7 *Discordance across control replicates*

8  
9 There were 3 positive control samples on each genotyping plate: a male control (Affymetrix  
10 CTL1 103 or Personal Genome Project participant huAA53E0), and one of two female controls  
11 (CEPH 1463-02 or CEPH 1347-02) in duplicate. For each marker and control sample we  
12 (CEPH 1463-02 or CEPH 1347-02) in duplicate. For each marker and control sample we  
13 computed a discordance metric ( $d$ ) defined as below:  
14  
15

$$16 \quad d = 1 - \frac{\max(n_{aa}, n_{ab}, n_{bb})}{n_{aa} + n_{ab} + n_{bb}}$$

17  
18 where  $n_{aa}$ ,  $n_{ab}$ ,  $n_{bb}$  is the number of times the genotypes AA, AB, and BB are called for the  
19 individual at that marker. There were 27,937 markers with control replicate discordance greater  
20 than 0.05 (i.e. concordance  $< 0.95$ ).  
21  
22

#### 23 24 25 26 27 *Sex genotype frequency discordance*

28  
29 To detect deviation in genotype frequency of markers between sexes, we used Fisher's exact  
30 test on the 2x3 table of genotype counts for autosomal SNPs (or 2x2 table of allele counts for  
31 the sex-specific regions of the X chromosome). There were 248 markers with discordant  
32 genotype counts or allele counts between sexes with p-value  $< 3.15 \times 10^{-10}$ , in which 192  
33 markers were on sex-specific region of the X chromosome.  
34  
35

#### 36 37 38 39 40 *Summary of results from marker-based tests*

41  
42 There were 37,706 SNPs that were flagged by one or more of the 4 tests. They are labeled in  
43 the marker quality control file accompanying this data release. The effect of this quality  
44 analysis is depicted by comparing [Supplementary Figure S3](#) with [Figure 1](#) where there is clear  
45 improvement in the concordance in minor allele frequency (MAF) between batches after  
46 removal of these markers. We recommend removing these markers but have maintained these  
47 markers in the dataset so that researchers have access to all data. In addition, 15,616  
48  
49  
50  
51  
52  
53  
54  
55  
56  
57  
58  
59  
60

1  
2  
3 insertions/deletions and 95,363 low-frequency SNPs with MAF < 0.005 were flagged as they  
4 may bias subsequent sample-based quality control.  
5

### 6 7 ***Sample-based quality control*** 8

9 This sample-based quality control was intended to identify samples of low-quality, related  
10 individuals, and provide a genetic-based description of ancestry. We thus encourage  
11 researchers using this information included in the data release to filter samples or devise their  
12 own sample quality control metrics that satisfy their research requirements.  
13

14 We selected the SNPs that passed all 4 tests from marker-based quality control with MAF >  
15 0.01 and marker-wise missingness < 0.01 resulting in a total of 573,386 markers. PLINK was  
16 used to prune these markers to a subset of 161,536 independent markers in approximate  
17 linkage equilibrium. They were used for the following sample-wise assessments. The pruning  
18 was done on window size of 5000 kb with pairwise  $r^2$  threshold as 0.1 and the number of  
19 variants to shift the window as 5.  
20  
21  
22  
23  
24  
25  
26  
27  
28  
29

### 30 ***Familial relatedness*** 31

32 Familial relationships among CLSA participants were not recorded in the questionnaires or  
33 interviews. However, this information is essential for some epidemiological and genomic  
34 analyses. Using the KING software <sup>10</sup> we computed all pairwise kinship coefficients and noted  
35 all pairs with inferred relatedness of 3rd degree or closer using autosomal SNPs ([Table 2](#),  
36 [Supplementary Figure S4](#)). Individuals with an inferred relationship of 3rd degree or closer are  
37 labeled in the database.  
38  
39  
40  
41  
42  
43  
44

### 45 ***Detection of outliers in heterozygosity and missing rates*** 46

47 Since extreme values in sample-wise heterozygosity and missingness may suggest low quality  
48 genotyping or cross-contamination of biological samples, we detected outliers by using PLINK  
49 ([Supplementary Figure S5](#)). As expected, because the allele frequencies differ between  
50 populations, we observed that heterozygosity was dependent on self-reported background.  
51  
52  
53  
54  
55

### 56 ***Population structure*** 57 58 59 60

1  
2  
3 Population structure was computed by principal component analysis (PCA) <sup>15</sup> to complement  
4 self-reported ancestry and control for population stratification in GWAS <sup>16 17</sup>. The top 20 principal  
5 components were computed using a high-quality subset of unrelated individuals by removing  
6 individuals classified as outliers in heterozygosity and missingness, and any individual with a  
7 relation of 3rd degree or less.  
8  
9

### 10 11 12 13 *Selection of European ancestry subset*

14  
15 To reduce the effect of population structure on analyses such as GWAS it is recommended to  
16 use a subset of the population with relatively homogeneous ancestry. The majority of individuals  
17 in this genomic data release are of self-reported European ancestry (N=25,172). We combined  
18 self-reported ancestry with genomic information and PCA analysis to identify a subset of self-  
19 reported European individuals with relatively homogenous ancestry and refer to this subset as  
20 the “CLSA European ancestry subset”.  
21  
22  
23  
24  
25  
26  
27  
28  
29

30 To determine the CLSA European ancestry subset we clustered the top 4 principal components  
31 from the analysis of population structure in the previous section into 6 clusters. Visualization of  
32 these clusters alongside those from 1000 Genomes reveals a clear overlap of the largest cluster  
33 (cluster 4, N=24,655) with populations of European ancestry in 1000 Genomes ([Figure 2](#)).  
34 Moreover, this largest cluster contains the vast majority of individuals in CLSA that self-report  
35 European ancestry ([Table 3](#), [Supplementary Table S2](#)). The European ancestry subset has  
36 markedly reduced variance in the top principal components as compared to the entire CLSA  
37 cohort ([Supplementary Figure S6](#)). The top 20 principal components of the PCA analysis are  
38 provided in the sample QC file accompanying this data release, as well as the top 10 principal  
39 components of the PCA analysis from the CLSA European ancestry subset.  
40  
41  
42  
43  
44  
45  
46  
47  
48  
49  
50

### 51 *Detection of copy number abnormalities associated with disease*

#### 52 53 54 *Sex chromosome abnormalities*

1  
2  
3 The sex chromosome composition was called by both Affymetrix Axiom™ Analysis Suite 2.0  
4 and PLINK. Affymetrix uses the ratio of mean signal values of non-polymorphic probes  
5 separately on the X and Y chromosomes to calculate sex. PLINK determines sex by using only  
6 X chromosome inbreeding coefficient (F estimates). When a subject has sex chromosome  
7 abnormalities such as Turner syndrome (45, X), Affymetrix will call them female but PLINK will  
8 call them male. Similarly, when a subject has Klinefelter Syndrome (47, XXY), Affymetrix will call  
9 the subject male but PLINK will call them female. We use this discordance information  
10 combined with copy number profiling to identify sex chromosome abnormalities in CLSA  
11 participants.  
12

13  
14 To correct the miscalling of males by stringent Affymetrix default threshold, the intensity data of  
15 chromosome X and Y markers from all UK Biobank samples were used as a training data set to  
16 generate a Support Vector Machine (SVM) model. This SVM model was applied to CLSA  
17 samples to recall the vast majority of miscalled samples (331 out of 359). However, the SVM  
18 approach as aforementioned could not be applied to PLINK sex calling since the sex calling in  
19 UK Biobank data was already corrected. Alternatively, an empirical threshold was used to recall  
20 most (140 out of 175) of the samples miscalled by PLINK through setting X chromosome F  
21 estimate  $< 0.3$  as female and  $> 0.8$  as male. We used a relatively more stringent threshold of F  
22 estimate because high F estimates may indicate mosaic chromosomal abnormalities such as  
23 mosaic deletion. Finally, we used Axiom CNV Summary Tool to calculate log<sub>2</sub> ratio and B allele  
24 frequency (BAF, which is in fact the within person ratio of B/B+A intensity at each SNP) for both  
25 X and Y chromosomes from the genotyping data. The log<sub>2</sub> ratio and BAF were used to identify  
26 sex chromosome abnormalities compared to males and females with 46,XY and 46,XX,  
27 respectively (Figure 3 (A-B)).  
28

29  
30 As a result, we detected 63 participants with discordance between self-reported sex and  
31 Affymetrix and/or PLINK sex calling (Supplementary Table S2), then we examined their CNV to  
32 identify them as one of four scenarios, sex chromosome aneuploidy (11 subjects), mosaic sex  
33  
34  
35  
36  
37  
38  
39  
40  
41  
42  
43  
44  
45  
46  
47  
48  
49  
50  
51  
52  
53  
54  
55  
56  
57  
58  
59  
60



1  
2  
3 chromosome aneuploidy (15 subjects), low heterozygosity on the X chromosome (14 subjects),  
4  
5 discordance between X chromosome number and self-reported sex without sex chromosome  
6  
7 aneuploidy (23 subjects). Briefly, we identified all 5 participants with self-reported sex  
8  
9 chromosome abnormalities including 1 mosaic Turner syndrome patient (45,X/46,XY)  
10  
11 (scenarios 1 and 2). We identified all 48 participants with sex discordance as in  
12  
13 abovementioned sex check. For the 23 participants who had discordance with both Affymetrix  
14  
15 and PLINK calling, CNV analysis confirmed the sex chromosome composition (scenario 4). In  
16  
17 addition, for participants with no self-reported sex, Affymetrix/PLINK calling and CNV analysis  
18  
19 are concordant to call sex. Besides the validated self-reported sex chromosomal abnormalities,  
20  
21 we identified 4 participants with Klinefelter syndrome (47,XXY) and 3 with Turner Syndrome  
22  
23 (45,X) (scenario 1) (Figure 3 (C-D)). In total, we found 3 participants with 45,X/46,XX  
24  
25 mosaicism, and 11 participants with 45,X/46,XY mosaicism including 1 with self-reported Turner  
26  
27 syndrome (45,X/46,XY) (Figure 3 (E-F)). Additionally, individuals with low heterozygosity on the  
28  
29 chromosome X could be a result of inbreeding (Supplementary Figure S7).

### 32 *Charcot-Marie-Tooth Disease*

33  
34 Charcot-Marie-Tooth disease (CMT) is one of the most common inherited neurological  
35  
36 disorders. It is mostly caused by duplication at 17p12 where *PMP22* is located (CMT1A and  
37  
38 CMT1E; OMIM: # 118220; # 118300). In this release of CLSA genomic data, there are 9 CLSA  
39  
40 participants who self-reported as having CMT. We examined their CNVs and found that 4  
41  
42 participants have duplication at *PMP22* (Supplementary Figure S8), and 1 participant has  
43  
44 deletion at *PMP22* (Supplementary Figure S8). The other 4 subjects did not have CNVs  
45  
46 detected at *PMP22*.

### 49 *HLA type imputation*

50  
51 We used the HLA\*IMP:02 method<sup>18</sup> and a multi-population reference panel<sup>18</sup> (ThermoFisher  
52  
53 Catalog # 000.911) to impute HLA types. The genotypes of 11 major MHC Class I and Class II  
54  
55 loci with 4-digit resolution were imputed for *HLA-A*, *-B*, *-C*, *-DPA1*, *-DPB1*, *-DQA1*, *-DQB1*, -  
56  
57  
58  
59

1  
2  
3 *DRB1*, *-DRB3*, *-DRB4*, *-DRB5*. For the positive controls, the imputation was done for 587  
4 replicates of NA12878, 75 replicates of NA24385 and 4 replicates of NA10859. The alleles  
5 called with a posterior probability threshold as 0.7 were compared to their known genotypes  
6 from literature. Calling accuracy was 100% across the loci ([Supplementary Table S3](#)). The  
7 imputation accuracy of genotyped CLSA participants was estimated by using the replicated  
8 samples. The validation rate is 100% for all the replicates.

### 15 ***Imputation to the TOPMed reference panel***

16  
17 Genotype imputation is a computational method to predict marker genotypes that are not  
18 directly genotyped by an assay, such as genotyping array, or to impute markers that are missing  
19 in certain individuals. The imputation process uses a reference panel of sequenced individuals  
20 to predict genotypes in a study sample for which only a subset of these genetic markers has  
21 been genotyped <sup>19</sup>. As input to the imputation process, we used the 26,622 CLSA participants  
22 that passed quality control, and the set of 653,729 markers that passed all marker QC tests,  
23 with SNP-wise missingness < 0.05, MAF > 0.0001 and have alleles that match the human  
24 genome GRCh37 reference sequence.

25  
26 Phasing and imputation were conducted using the TOPMed reference panel <sup>20</sup> at the University  
27 of Michigan Imputation Service <sup>21</sup>. We used the TOPMed reference panel version r2, containing  
28 97,256 reference samples at 308,107,085 genetic markers. We used this imputation service to  
29 pre-phase and impute the CLSA genotype data using EAGLE2 <sup>22</sup> and Minimac <sup>19</sup>, respectively.  
30 Both autosomal and X chromosome variants were imputed. The imputation was carried out in  
31 two batches of 13,310 and 13,312 CLSA samples. Each batch also included the one of each 3  
32 control samples. The two batches were subsequently merged into a single dataset.

### 33 ***Imputation performance***

34  
35 Imputation quality using the TOPMed reference panel was assessed using the marker-wise  
36 information measure (Rs<sub>q</sub>) and compared to the imputation using the Haplotype Reference  
37 Consortium reference panel containing 32,488 reference samples and 40.4 million genetic  
38

1  
2  
3 markers <sup>23</sup>. For each imputation data set, information measures for all SNPs on chromosome 22  
4  
5 were stratified into MAF bins prior to comparison. Comparison of imputation quality between the  
6  
7 two reference panels demonstrated that the TOPMed reference panel yielded overall higher  
8  
9 imputation quality, likely due to the larger number of samples included in the reference panel  
10  
11 (Supplementary Figure S9). The relatively better imputation performance may also be  
12  
13 empowered by the higher sequencing depth and joint calling method that were used to generate  
14  
15 the TOPMed reference panel.  
16  
17  
18  
19

### 20 **Findings to date**

21  
22 This data resource has been used in four completed and several ongoing studies. Glaucoma is  
23  
24 the second leading cause of irreversible blindness in the world <sup>24</sup>. The GWAS combining data  
25  
26 from UK Biobank, CLSA and the International Glaucoma Genetic Consortium identified more  
27  
28 than 100 novel loci for vertical cup-to-disc ratio and vertical disc diameter <sup>25</sup>. They are highly  
29  
30 heritable optic disc morphology traits related to glaucoma risk. In a study to investigate the  
31  
32 contribution of polygenic risk score (PRS) to screening for fracture risk <sup>26</sup>, the CLSA genomic  
33  
34 data were linked to the participants' physical examinations. It was the largest cohort included in  
35  
36 this combined analysis of fracture risk, which enabled the researchers to understand the  
37  
38 performance of PRS particularly in older individuals. It was found that the genetic pre-screening  
39  
40 could reduce the number of further assessments to identify individuals at high risk of  
41  
42 osteoporotic fractures. In another study on cardiovascular disease <sup>27</sup>, the investigators  
43  
44 evaluated the independent effects and interactions of multiscale risk factors by taking advantage  
45  
46 of combined genomic and psychosocial information collected in CLSA cohort. In addition, the  
47  
48 CLSA dataset provides opportunities to study other conditions related to complex diseases. It  
49  
50 was employed by a large scale GWAS on sleep apnoea which was associated with  
51  
52 cardiovascular disease and glaucoma. The authors revealed robust novel associations between  
53  
54  
55  
56  
57  
58  
59  
60

1  
2  
3 30 genes and this condition, and substantial molecular overlap with other complex traits<sup>28</sup>. For  
4 further publications please consult <https://www.clsa-elcv.ca/stay-informed/publications>.  
5  
6  
7

### 8 9 **Strengths and limitations**

10  
11 The CLSA genomic data are a unique resource nested in a large-scale, longitudinal study  
12 profiling the aging population in Canada. The genotyping array is enriched with known markers  
13 associated with multiple phenotypes. However, the UK Biobank array may have relatively lower  
14 coverage in participants with non-European ancestry<sup>29</sup>, which can be improved by using  
15 imputation reference panels with high genetic diversity<sup>30</sup>. It may be difficult to identify very rare  
16 variants by using this genotyping data since the current imputation method cannot confidently  
17 predict variants with frequency under certain threshold. In spite of these limitations, CLSA  
18 cohort includes deep and extensive phenotyping and planned linkage to health administrative  
19 databases. For example, recently the metabolomic data comprising 1,314 biochemicals became  
20 available in approximately 9,500 blood samples collected from CLSA participants, which can be  
21 integrated to this genomic data to help understand the causes of frailty related diseases. DNA  
22 methylation data are generated on 850,000 methylation sites in 1,479 participants. The CLSA  
23 has also initiated a subcohort to collect longitudinal data from magnetic resonance imaging of  
24 the brain and microbiome of the gut in 6,000 participants. This data resource will facilitate the  
25 research on complex relationship between human genomic variants and a wide spectrum of  
26 environmental, lifestyle, and medical factors. The comprehensive pharmacogenomic and  
27 inflammation markers among other disease-associated variants may be of particular interest  
28 since DNA methylation and proteomic data are being generated. The CLSA overall is an  
29 ongoing perspective study. Follow-up data will continue to be collected from participants in the  
30 present genomic subcohort.  
31  
32  
33  
34  
35  
36  
37  
38  
39  
40  
41  
42  
43  
44  
45  
46  
47  
48  
49  
50  
51  
52  
53  
54  
55  
56  
57  
58  
59  
60

## Collaboration

The genomic data from the CLSA Comprehensive cohort are accessible via the CLSA Data Access process (<https://www.clsa-elcv.ca/data-access>). The list of phenotypic variables can be browsed via the CLSA Data Preview Portal (<https://datapreview.clsa-elcv.ca/>). To be informed of the potential overlapping research topics, prospective data users are encouraged to consult the approved project summaries catalogued on the CLSA website (<http://www.clsa-elcv.ca/researchers/approved-project-summaries>). Given that this genomic data resource is released in 2018, we calculated the proportion of data requests including genomic data since 2018. At the time of writing, 17% of approved projects requested genetic data for their studies. The directly genotyped data are provided in binary PLINK format. It is recommended to use PLINK to manipulate these files (<https://www.cog-genomics.org/plink/1.9/>). The imputed genotyped data are provided in binary BGEN version 1.2 format using 8-bit encoding. It is recommended to use *qctool* version 2 or *bgenix* to manipulate this data type. The HLA imputation file is a plain text file containing information pertaining to the imputation of classical human leukocyte antigen alleles from SNP genotypes. All studies using CLSA genetic data resource are required to give full acknowledgement to CLSA in their publications following instructions in *Publication and Promotion Policy for CLSA Data Users* on <https://www.clsa-elcv.ca>.

## Ethics statement

Ethics approval was provided by McMaster University Research Ethics Board. Study numbers: 10-423 2010-2336 11.003 C2010-80 2009-18 H10-02143 H2010:330 M16-10-023 2010s0527.

## Funding

This research was made possible using the data collected by the Canadian Longitudinal Study on Aging (CLSA). Funding for the Canadian Longitudinal Study on Aging (CLSA) is provided by the Government of Canada through the Canadian Institutes of Health Research (CIHR) under

1  
2  
3 grant reference: LSA 94473 and the Canada Foundation for Innovation, as well as the following  
4 provinces (no award/grant number), Newfoundland, Nova Scotia, Quebec, Ontario, Manitoba,  
5 Alberta, and British Columbia. The CLSA is led by Drs. Parminder Raina, Christina Wolfson and  
6 Susan Kirkland. The work was also supported by Genome Canada Technology Platform  
7 #12505 and CFI#33408.  
8  
9  
10  
11  
12

### 13 ***Author contributions***

14 V.F. and R.L. conducted data analyses and drafted the manuscript, C.D-Z. and A.B. generated  
15 data, C.B., D.R., C.W., G.L., G.P., A.D.P., L.E.G., C.V., M.L., S.K., P.R., J.B.R., and J.R  
16 developed the concept and report design. All authors revised the manuscript critically for  
17 important intellectual content and approved the final version to be published.  
18  
19  
20  
21  
22

23 ***Competing interests:*** None declared.  
24

### 25 ***Data availability statement***

26 Data are available from the Canadian Longitudinal Study on Aging ([www.clsa-elcv.ca](http://www.clsa-elcv.ca)) for  
27 researchers who meet the criteria for access to de-identified CLSA data.  
28  
29  
30  
31  
32  
33  
34  
35  
36  
37  
38  
39  
40  
41  
42  
43  
44  
45  
46  
47  
48  
49  
50  
51  
52  
53  
54  
55  
56  
57  
58  
59  
60

**Reference:**

1. Vineis P, Marinelli D, Autrup H, et al. Current smoking, occupation, N-acetyltransferase-2 and bladder cancer: a pooled analysis of genotype-based studies. *Cancer Epidemiol Biomarkers Prev* 2001;10(12):1249-52.
2. Wu C, Kraft P, Zhai K, et al. Genome-wide association analyses of esophageal squamous cell carcinoma in Chinese identify multiple susceptibility loci and gene-environment interactions. *Nat Genet* 2012;44(10):1090-7. doi: 10.1038/ng.2411 [published Online First: 20120909]
3. Singh PP, Demmitt BA, Nath RD, et al. The Genetics of Aging: A Vertebrate Perspective. *Cell* 2019;177(1):200-20. doi: 10.1016/j.cell.2019.02.038 [published Online First: 2019/03/23]
4. Melzer D, Pilling LC, Ferrucci L. The genetics of human ageing. *Nat Rev Genet* 2020;21(2):88-101. doi: 10.1038/s41576-019-0183-6 [published Online First: 2019/11/07]
5. Rask-Andersen M, Karlsson T, Ek WE, et al. Gene-environment interaction study for BMI reveals interactions between genetic factors and physical activity, alcohol consumption and socioeconomic status. *PLoS Genet* 2017;13(9):e1006977. doi: 10.1371/journal.pgen.1006977 [published Online First: 20170905]
6. Raina P, Wolfson C, Kirkland S, et al. Cohort Profile: The Canadian Longitudinal Study on Aging (CLSA). *Int J Epidemiol* 2019;48(6):1752-53j. doi: 10.1093/ije/dyz173 [published Online First: 2019/10/22]
7. Affymetrix. UKB WCGSAX: UK Biobank 500K Samples Genotyping Data Generation by the Affymetrix Research Services Laboratory. 2017. [http://biobank.ndph.ox.ac.uk/showcase/docs/affy\\_data\\_generation2017.pdf](http://biobank.ndph.ox.ac.uk/showcase/docs/affy_data_generation2017.pdf).
8. Raina PS, Wolfson C, Kirkland SA, et al. The Canadian longitudinal study on aging (CLSA). *Can J Aging* 2009;28(3):221-9. doi: 10.1017/S0714980809990055 [published Online First: 2009/10/29]
9. UK Biobank Axiom Array | UK Biobank [Available from: <http://www.ukbiobank.ac.uk/scientists-3/uk-biobank-axiom-array/> accessed 10. Apr. 2018.
10. Manichaikul A, Mychaleckyj JC, Rich SS, et al. Robust relationship inference in genome-wide association studies. *Bioinformatics* 2010;26(22):2867-73. doi: 10.1093/bioinformatics/btq559 [published Online First: 2010/10/12]
11. Chang CC, Chow CC, Tellier LC, et al. Second-generation PLINK: rising to the challenge of larger and richer datasets. *Gigascience* 2015;4:7. doi: 10.1186/s13742-015-0047-8 [published Online First: 2015/02/28]
12. Chang SPaC. PLINK 1.9 [Available from: <https://www.cog-genomics.org/plink1.9> accessed 27. Apr 2018.
13. Genomes Project C, Auton A, Brooks LD, et al. A global reference for human genetic variation. *Nature* 2015;526(7571):68-74. doi: 10.1038/nature15393

14. Wigginton JE, Cutler DJ, Abecasis GR. A note on exact tests of Hardy-Weinberg equilibrium. *Am J Hum Genet* 2005;76(5):887-93. doi: 10.1086/429864 [published Online First: 2005/03/25]
15. Galinsky KJ, Bhatia G, Loh PR, et al. Fast Principal-Component Analysis Reveals Convergent Evolution of ADH1B in Europe and East Asia. *Am J Hum Genet* 2016;98(3):456-72. doi: 10.1016/j.ajhg.2015.12.022 [published Online First: 2016/03/01]
16. Balding DJ. A tutorial on statistical methods for population association studies. *Nat Rev Genet* 2006;7(10):781-91. doi: 10.1038/nrg1916 [published Online First: 2006/09/20]
17. Price AL, Patterson NJ, Plenge RM, et al. Principal components analysis corrects for stratification in genome-wide association studies. *Nat Genet* 2006;38(8):904-9. doi: 10.1038/ng1847 [published Online First: 2006/07/25]
18. Diltney A, Leslie S, Moutsianas L, et al. Multi-population classical HLA type imputation. *PLoS Comput Biol* 2013;9(2):e1002877. doi: 10.1371/journal.pcbi.1002877 [published Online First: 2013/03/06]
19. Fuchsberger C, Abecasis GR, Hinds DA. minimac2: faster genotype imputation. *Bioinformatics* 2015;31(5):782-4. doi: 10.1093/bioinformatics/btu704 [published Online First: 2014/10/24]
20. Taliun D, Harris DN, Kessler MD, et al. Sequencing of 53,831 diverse genomes from the NHLBI TOPMed Program. *Nature* 2021;590(7845):290-99. doi: 10.1038/s41586-021-03205-y [published Online First: 2021/02/12]
21. Das S, Forer L, Schonherr S, et al. Next-generation genotype imputation service and methods. *Nat Genet* 2016;48(10):1284-87. doi: 10.1038/ng.3656 [published Online First: 2016/08/30]
22. Loh PR, Danecek P, Palamara PF, et al. Reference-based phasing using the Haplotype Reference Consortium panel. *Nat Genet* 2016;48(11):1443-48. doi: 10.1038/ng.3679 [published Online First: 2016/10/28]
23. McCarthy S, Das S, Kretzschmar W, et al. A reference panel of 64,976 haplotypes for genotype imputation. *Nat Genet* 2016;48(10):1279-83. doi: 10.1038/ng.3643 [published Online First: 2016/08/23]
24. Blindness GBD, Vision Impairment C, Vision Loss Expert Group of the Global Burden of Disease S. Causes of blindness and vision impairment in 2020 and trends over 30 years, and prevalence of avoidable blindness in relation to VISION 2020: the Right to Sight: an analysis for the Global Burden of Disease Study. *Lancet Glob Health* 2021;9(2):e144-e60. doi: 10.1016/S2214-109X(20)30489-7 [published Online First: 20201201]
25. Han X, Steven K, Qassim A, et al. Automated AI labeling of optic nerve head enables insights into cross-ancestry glaucoma risk and genetic discovery in >280,000 images from UKB and CLSA. *Am J Hum Genet* 2021;108(7):1204-16. doi: 10.1016/j.ajhg.2021.05.005 [published Online First: 20210601]
26. Forgetta V, Keller-Baruch J, Forest M, et al. Development of a polygenic risk score to improve screening for fracture risk: A genetic risk prediction study. *PLoS Med* 2020;17(7):e1003152. doi: 10.1371/journal.pmed.1003152 [published Online First: 2020/07/03]



- 1  
2  
3 27. Menniti G, Paquet C, Han HY, et al. Multiscale Risk Factors of Cardiovascular Disease: CLSA  
4 Analysis of Genetic and Psychosocial Factors. *Front Cardiovasc Med* 2021;8:599671. doi:  
5 10.3389/fcvm.2021.599671 [published Online First: 2021/04/03]  
6  
7 28. Campos AI, Ingold N, Huang Y, et al. Genome-wide analyses in 1,987,836 participants  
8 identify 39 genetic loci associated with sleep apnoea. *medRxiv*  
9 2020:2020.09.29.20199893. doi: 10.1101/2020.09.29.20199893  
10  
11 29. UK Biobank Axiom Array 2017 [Available from: [https://www.thermofisher.com/document-](https://www.thermofisher.com/document-connect/document-connect.html?url=https%3A%2F%2Fassets.thermofisher.com%2FTFS-Assets%2FLSG%2Fbrochures%2Fuk_axiom_biobank_genotyping_arrays_datasheet.pdf)  
12 [connect/document-](https://www.thermofisher.com/document-connect/document-connect.html?url=https%3A%2F%2Fassets.thermofisher.com%2FTFS-Assets%2FLSG%2Fbrochures%2Fuk_axiom_biobank_genotyping_arrays_datasheet.pdf)  
13 [connect.html?url=https%3A%2F%2Fassets.thermofisher.com%2FTFS-](https://www.thermofisher.com/document-connect/document-connect.html?url=https%3A%2F%2Fassets.thermofisher.com%2FTFS-Assets%2FLSG%2Fbrochures%2Fuk_axiom_biobank_genotyping_arrays_datasheet.pdf)  
14 [Assets%2FLSG%2Fbrochures%2Fuk\\_axiom\\_biobank\\_genotyping\\_arrays\\_datasheet.pdf](https://www.thermofisher.com/document-connect/document-connect.html?url=https%3A%2F%2Fassets.thermofisher.com%2FTFS-Assets%2FLSG%2Fbrochures%2Fuk_axiom_biobank_genotyping_arrays_datasheet.pdf).  
15  
16 30. Bycroft C, Freeman C, Petkova D, et al. The UK Biobank resource with deep phenotyping and  
17 genomic data. *Nature* 2018;562(7726):203-09. doi: 10.1038/s41586-018-0579-z  
18 [published Online First: 20181010]  
19  
20  
21  
22  
23  
24  
25  
26  
27  
28  
29  
30  
31  
32  
33  
34  
35  
36  
37  
38  
39  
40  
41  
42  
43  
44  
45  
46  
47  
48  
49  
50  
51  
52  
53  
54  
55  
56  
57  
58  
59  
60

1  
2  
3  
4  
5  
6  
7  
8  
9  
10  
11  
12  
13  
14  
15  
16  
17  
18  
19  
20  
21  
22  
23  
24  
25  
26  
27  
28  
29  
30  
31  
32  
33  
34  
35  
36  
37  
38  
39  
40  
41  
42  
43  
44  
45  
46  
47  
48  
49  
50  
51  
52  
53  
54  
55  
56  
57  
58  
59  
60

**Table1:** Count of CLSA genotyped participants by self-reported sex and sex chromosome composition

| <b>Self-reported Sex</b> | <b>Sex Chromosome Composition</b> | <b>Count</b> |
|--------------------------|-----------------------------------|--------------|
| Male                     | Male                              | 13324        |
| Female                   | Female                            | 13250        |
| Female                   | Male                              | 17           |
| Male                     | Female                            | 16           |
| Female                   | Undefined                         | 10           |
| Male                     | Undefined                         | 5            |

For peer review only

**Table 2:** Count of kinship pairs per type of inferred relationship

| Inferred Relationship  | Count  |
|------------------------|--------|
| Monozygotic twin       | 1      |
| Full sibling           | 357    |
| Parent/offspring       | 176    |
| 2 <sup>nd</sup> degree | 315    |
| 3 <sup>rd</sup> degree | 1066   |
| Unrelated              | 123294 |

For peer review only

**Table 3:** Count of CLSA genotyped participants per self-reported ancestry and k-means cluster

| Self-reported ancestry <sup>a</sup> | k-means cluster |     |     |       |     |    |
|-------------------------------------|-----------------|-----|-----|-------|-----|----|
|                                     | 1               | 2   | 3   | 4     | 5   | 6  |
| Black                               | 7               | 0   | 156 | 0     | 7   | 0  |
| East Asian                          | 0               | 214 | 1   | 2     | 0   | 3  |
| Latin American                      | 1               | 0   | 1   | 2     | 9   | 72 |
| Mixed                               | 11              | 11  | 7   | 207   | 61  | 21 |
| Other                               | 11              | 5   | 8   | 54    | 53  | 41 |
| South Asian                         | 211             | 5   | 0   | 0     | 7   | 0  |
| Southeast Asian                     | 20              | 61  | 0   | 0     | 1   | 1  |
| West Asian                          | 4               | 0   | 1   | 2     | 98  | 0  |
| White                               | 7               | 2   | 0   | 24380 | 742 | 41 |
| White and Asian                     | 3               | 3   | 0   | 5     | 19  | 11 |
| White and Black                     | 2               | 0   | 11  | 3     | 17  | 0  |

<sup>a</sup>The details of grouping self-reported cultural and racial category into fewer groups are in Supplementary Table S2

1  
2  
3 **Figure 1:** Pairwise plot of allele frequency of SNPs that pass all 4 tests from genotype batch 1  
4  
5 to 5.

6  
7 The SNPs are considered as passed if they have nonsignificant p-value (Fisher's  $p > 3.5 \times$   
8  
9  $10^{-10}$ ) below the multiple testing corrected threshold for the respective test on discordant  
10  
11 genotype frequency between batch, departure from HWE, discordance between the positive  
12  
13 control replicates and on discordant genotype frequency between male and female.  
14  
15

16  
17  
18  
19  
20  
21  
22  
23  
24  
25  
26  
27  
28  
29  
30  
31  
32  
33  
34  
35  
36  
37  
38  
39  
40  
41  
42  
43  
44  
45  
46  
47  
48  
49  
50  
51  
52  
53  
54  
55  
56  
57  
58  
59  
60

For peer review only

1  
2  
3 **Figure 2:** Determining the CLSA European ancestry subset.  
4

5 (A) Top 4 principal components from all 1000 Genomes populations labelled and coloured.  
6

7 Population code refers to <https://www.internationalgenome.org/category/population/>. (B) Top 4  
8 principal components from CLSA color coded and labelled by cluster number.  
9  
10  
11  
12  
13  
14  
15  
16  
17  
18  
19  
20  
21  
22  
23  
24  
25  
26  
27  
28  
29  
30  
31  
32  
33  
34  
35  
36  
37  
38  
39  
40  
41  
42  
43  
44  
45  
46  
47  
48  
49  
50  
51  
52  
53  
54  
55  
56  
57  
58  
59  
60

1  
2  
3 **Figure 3:** BAF (TOP) and log<sub>2</sub> ratio (BOTTOM) of chromosomes X and Y are shown for sex  
4 chromosome abnormalities.  
5

6  
7 (A) In 46,XY, the BAF is either 0 or 1 and the expected log<sub>2</sub> Ratio is less than 0 on chromosome  
8 X. However, in the pseudoautosomal region (PAR) and the chrY11.2/chrXq21.3 homology  
9 block, there are heterozygous calls in male shown as BAF of 0.5. The red line shows the lowest  
10 curve for log<sub>2</sub> Ratio. The BAF is either 0 or 1 and the expected log<sub>2</sub> Ratio is 0 on chromosome  
11 Y. (B) In 46,XX, the BAF is either 0 (AA), ½ (AB) or 1 (BB) and the expected Log<sub>2</sub> Ratio is 0 on  
12 chromosome X as in a normal diploid cell. The BAF is between 0 and 1, and Log<sub>2</sub> Ratio is less  
13 than 0 on chromosome Y. (C) For Klinefelter syndrome (47,XXY), log<sub>2</sub> ratio is around 0 on  
14 chromosome X which indicates ploidy as 2N. Compared to 46,XY, there is relatively lower  
15 peaks of log<sub>2</sub> ratio at PAR and chrX21.3/chrY11.2 homology block region. And BAF of  
16 heterozygous calls at PAR and chrX21.3/chrY11.2 homology block region shifted from 0.5 to  
17 intermediate values. They both indicated an extra copy of chromosome X. Chromosome Y  
18 intensity profile showed clear male pattern. (D) For Turner syndrome (45,X), on chromosome X,  
19 log<sub>2</sub> ratio is below 0 and there is no BAF bands of 0.5, which indicates one copy loss.  
20 Chromosome Y intensity profile showed clear female pattern. (E) For 45,X/46,XX mosaicism, on  
21 chromosome X, there is a relatively smaller decrease of log<sub>2</sub> ratio compared to 1 copy of  
22 chromosome X as in male. The BAF of heterozygous calls on chromosome X is split to  
23 intermediate values. They both indicate that the sample is mosaic for deletion of chromosome  
24 X. Chromosome Y intensity profile showed clear female pattern. (F) For 45,X/46,XY mosaicism,  
25 the log<sub>2</sub> ratio less than 0 and no BAF 0.5 band on chromosome X indicates one copy. The log<sub>2</sub>  
26 ratio shifts to below 0 and BAF values between 0 and 1 on chromosome Y indicates  
27 chromosome loss. However, the intermediate BAF values close to 0 or 1 at PAR and  
28 chrX21.3/chrY11.2 homology block region indicates the loss of chromosome Y is existed in a  
29 larger proportion of cells.  
30  
31  
32  
33  
34  
35  
36  
37  
38  
39  
40  
41  
42  
43  
44  
45  
46  
47  
48  
49  
50  
51  
52  
53  
54  
55  
56  
57  
58  
59  
60

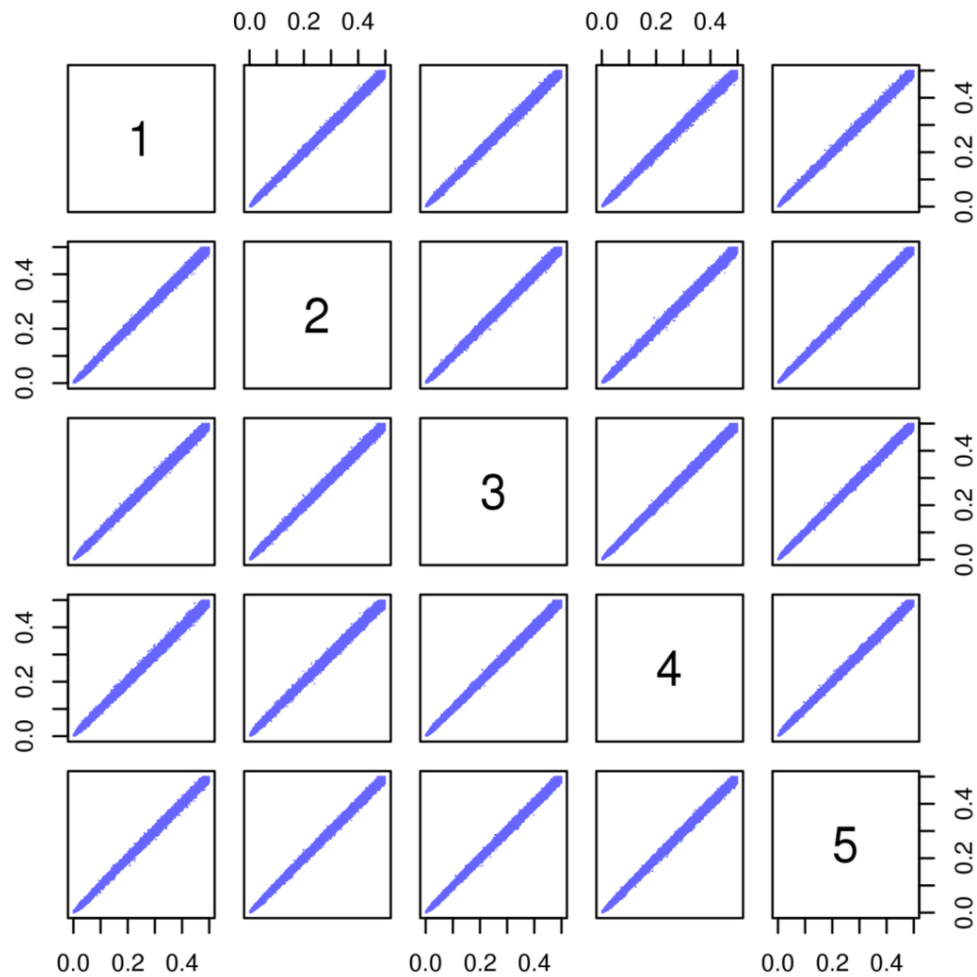

Figure 1: Pairwise plot of allele frequency of SNPs that pass all 4 tests from genotype batch 1 to 5. The SNPs are considered as passed if they have nonsignificant p-value (Fisher's  $p > 3.5 \times 10^{-10}$ ) below the multiple testing corrected threshold for the respective test on discordant genotype frequency between batch, departure from HWE, discordance between the positive control replicates and on discordant genotype frequency between male and female.

89x88mm (300 x 300 DPI)



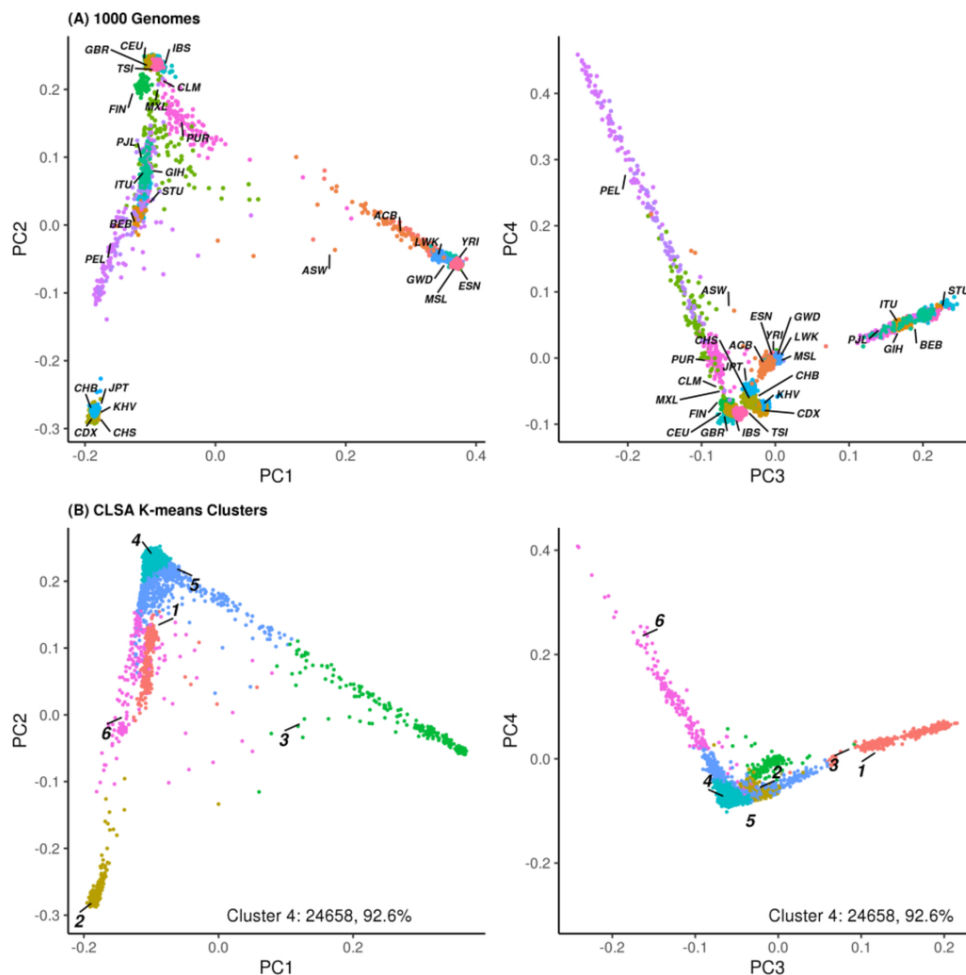

Figure 2: Determining the CLSA European ancestry subset.  
 (A) Top 4 principal components from all 1000 Genomes populations labelled and coloured. Population code refers to <https://www.internationalgenome.org/category/population/>. (B) Top 4 principal components from CLSA color coded and labelled by cluster number.

89x89mm (300 x 300 DPI)

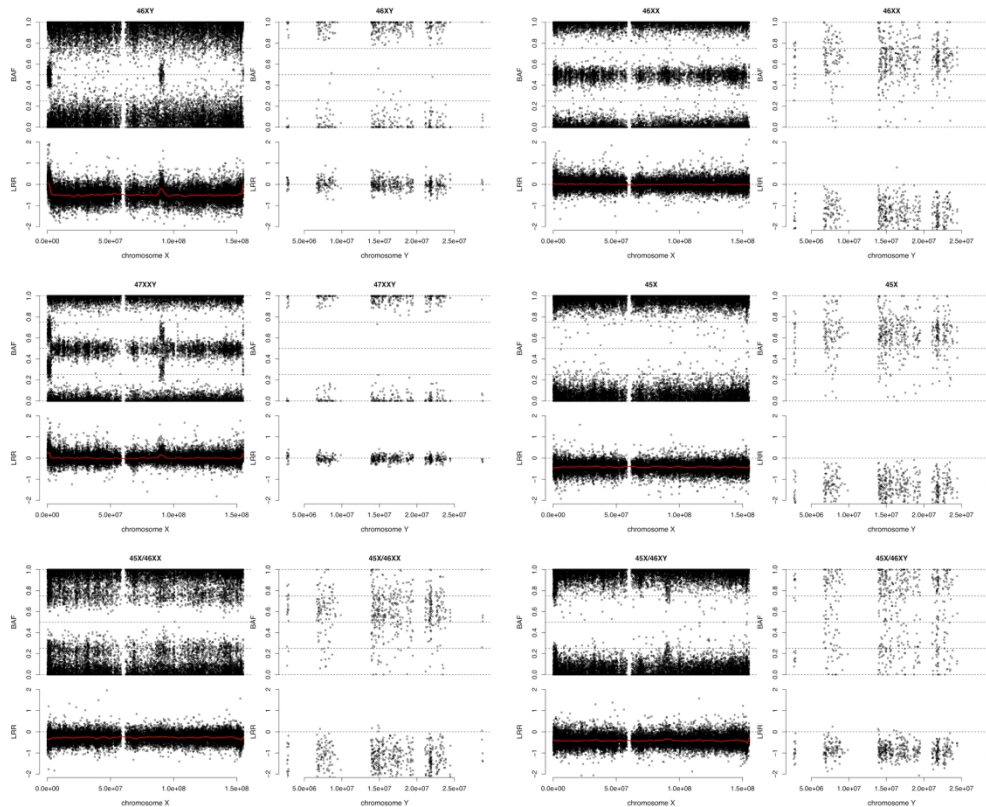

Figure 3: BAF (TOP) and log<sub>2</sub> ratio (BOTTOM) of chromosomes X and Y are shown for sex chromosome abnormalities.

(A) In 46,XY, the BAF is either 0 or 1 and the expected log<sub>2</sub> Ratio is less than 0 on chromosome X. However, in the pseudoautosomal region (PAR) and the chrY11.2/chrXq21.3 homology block, there are heterozygous calls in male shown as BAF of 0.5. The red line shows the lowest curve for log<sub>2</sub> Ratio. The BAF is either 0 or 1 and the expected log<sub>2</sub> Ratio is 0 on chromosome Y. (B) In 46,XX, the BAF is either 0 (AA), 1/2 (AB) or 1 (BB) and the expected Log<sub>2</sub> Ratio is 0 on chromosome X as in a normal diploid cell. The BAF is between 0 and 1, and Log<sub>2</sub> Ratio is less than 0 on chromosome Y. (C) For Klinefelter syndrome (47,XXY), log<sub>2</sub> ratio is around 0 on chromosome X which indicates ploidy as 2N. Compared to 46,XY, there is relatively lower peaks of log<sub>2</sub> ratio at PAR and chrX21.3/chrY11.2 homology block region. And BAF of heterozygous calls at PAR and chrX21.3/chrY11.2 homology block region shifted from 0.5 to intermediate values. They both indicated an extra copy of chromosome X. Chromosome Y intensity profile showed clear male pattern. (D) For Turner syndrome (45,X), on chromosome X, log<sub>2</sub> ratio is below 0 and there is no BAF bands of 0.5, which indicates one copy loss. Chromosome Y intensity profile showed clear female pattern. (E) For 45,X/46,XX mosaicism, on chromosome X, there is a relatively smaller decrease of log<sub>2</sub> ratio compared to 1 copy of chromosome X as in male. The BAF of heterozygous calls on chromosome X is split to intermediate values. They both indicate that the sample is mosaic for deletion of chromosome X. Chromosome Y intensity profile showed clear female pattern. (F) For 45,X/46,XY mosaicism, the log<sub>2</sub> ratio less than 0 and no BAF 0.5 band on chromosome X indicates one copy. The log<sub>2</sub> ratio shifts to below 0 and BAF values between 0 and 1 on chromosome Y indicates chromosome loss. However, the intermediate BAF values close to 0 or 1 at PAR and chrX21.3/chrY11.2 homology block region indicates the loss of chromosome Y is existed in a larger proportion of cells.

90x72mm (600 x 600 DPI)

**Supplementary Table S1:** Sex chromosome determination of miscalled genotyped CLSA participants

| Self reported sex | Affymetrix sex corrected by SVM | PLINK sex (raw F estimate <0.3 female raw F estimate >0.8 male) | discordance in section Sex chromosome composition | PLINK sex (adjusted F estimate <0.4 female adjusted F estimate >0.8 male) | sex determined by combined Affymetrix/PLINK/CNV approach | CLSA self-reported phenotype | chromosomal abnormality from CNV profile | Raw F estimate | Adjusted F estimate |
|-------------------|---------------------------------|-----------------------------------------------------------------|---------------------------------------------------|---------------------------------------------------------------------------|----------------------------------------------------------|------------------------------|------------------------------------------|----------------|---------------------|
| male              | female                          | female                                                          | 1                                                 | female                                                                    | female                                                   |                              | No abnormality                           | -0.00301       | 0.01745             |
| male              | male                            | female                                                          | 1                                                 | female                                                                    | male                                                     |                              | Klinefelter Syndrome (47,XXY)            | 0.1048         | 0.1002              |
| female            | male                            | male                                                            | 1                                                 | male                                                                      | male                                                     |                              | No abnormality                           | 1              | 1                   |
| male              | female                          | female                                                          | 1                                                 | female                                                                    | female                                                   |                              | No abnormality                           | 0.01533        | 0.02791             |
| female            | female                          | unknown                                                         |                                                   | female                                                                    | female                                                   |                              | Low heterozygosity on chrX               | 0.3495         | 0.3644              |
| female            | female                          | unknown                                                         | 1                                                 | unknown                                                                   | female                                                   |                              | 45,X/46,XX mosaicism                     | 0.5095         | 0.4773              |
| female            | female                          | unknown                                                         | 1                                                 | unknown                                                                   | female                                                   |                              | Low heterozygosity on chrX               | 0.4637         | 0.4485              |
| female            | female                          | unknown                                                         | 1                                                 | unknown                                                                   | female                                                   |                              | Low heterozygosity on chrX               | 0.4352         | 0.4746              |
| male              | female                          | female                                                          | 1                                                 | female                                                                    | female                                                   |                              | No abnormality                           | 0.008892       | 0.03223             |
| female            | male                            | male                                                            | 1                                                 | male                                                                      | male                                                     |                              | No abnormality                           | 1              | 1                   |
| female            | male                            | male                                                            | 1                                                 | male                                                                      | male                                                     |                              | No abnormality                           | 1              | 1                   |
| male              | female                          | female                                                          | 1                                                 | female                                                                    | female                                                   |                              | No abnormality                           | -0.03065       | -0.02794            |
| female            | female                          | male                                                            | 1                                                 | male                                                                      | female                                                   | Turner Syndrome              | Turner Syndrome (45,X)                   | 0.9507         | 0.9614              |
| female            | male                            | male                                                            | 1                                                 | male                                                                      | male                                                     |                              | No abnormality                           | 1              | 1                   |
| female            | female                          | unknown                                                         |                                                   | female                                                                    | female                                                   |                              | Low heterozygosity on chrX               | 0.3043         | 0.2802              |
| male              | female                          | female                                                          | 1                                                 | female                                                                    | female                                                   |                              | No abnormality                           | -0.002689      | -0.01603            |
| female            | male                            | male                                                            | 1                                                 | male                                                                      | male                                                     |                              | No abnormality                           | 1              | 1                   |
| male              | male                            | unknown                                                         | 1                                                 | female                                                                    | male                                                     |                              | Klinefelter Syndrome (47,XXY)            | 0.3124         | 0.3235              |
| female            | male                            | male                                                            | 1                                                 | male                                                                      | male                                                     |                              | No abnormality                           | 1              | 1                   |
| male              | male                            | unknown                                                         | 1                                                 | unknown                                                                   | male                                                     |                              | No abnormality                           | 0.6854         | 0.6878              |
| male              | male                            | unknown                                                         | 1                                                 | unknown                                                                   | male                                                     |                              | 45,X/46,XY mosaicism                     | 0.5798         | 0.5893              |
| female            | female                          | male                                                            | 1                                                 | male                                                                      | female                                                   |                              | Turner Syndrome (45,X)                   | 0.9792         | 0.9875              |
| female            | male                            | male                                                            | 1                                                 | male                                                                      | male                                                     |                              | No abnormality                           | 1              | 1                   |
| male              | female                          | female                                                          | 1                                                 | female                                                                    | female                                                   |                              | No abnormality                           | 0.04474        | 0.03819             |
| female            | female                          | male                                                            | 1                                                 | male                                                                      | female                                                   |                              | Turner Syndrome (45,X)                   | 0.9439         | 0.9545              |
| male              | male                            | unknown                                                         |                                                   | male                                                                      | male                                                     |                              | 45,X/46,XY mosaicism                     | 0.7965         | 0.8497              |
| female            | female                          | unknown                                                         | 1                                                 | unknown                                                                   | female                                                   |                              | Low heterozygosity on chrX               | 0.4524         | 0.4305              |
| male              | female                          | male                                                            |                                                   | male                                                                      | female                                                   |                              | 45,X/46,XY mosaicism                     | 0.9748         | 0.986               |
| female            | female                          | unknown                                                         | 1                                                 | unknown                                                                   | female                                                   |                              | Low heterozygosity on chrX               | 0.5457         | 0.5504              |

|    |        |        |         |   |         |        |                      |                               |           |           |
|----|--------|--------|---------|---|---------|--------|----------------------|-------------------------------|-----------|-----------|
| 1  |        |        |         |   |         |        |                      |                               |           |           |
| 2  | male   | female | male    |   | male    | male   |                      | 45,X/46,XY mosaicism          | 0.9678    | 0.9797    |
| 3  | female | female | male    | 1 | unknown | female |                      | Low heterozygosity on chrX    | 0.8076    | 0.7966    |
| 4  | female | male   | male    | 1 | male    | male   |                      | No abnormality                | 1         | 1         |
| 5  | female | male   | unknown | 1 | male    | female | Turner Syndrome      | 45,X/46,XY mosaicism          | 0.7827    | 0.8404    |
| 6  | male   | male   | female  | 1 | female  | male   |                      | Klinefelter Syndrome (47,XXY) | -0.0457   | -0.04304  |
| 7  | female | female | male    | 1 | male    | female |                      | Turner Syndrome (45,X)        | 0.879     | 0.9028    |
| 8  | female | female | unknown |   | female  | female |                      | Low heterozygosity on chrX    | 0.3035    | 0.3339    |
| 9  | male   | male   | unknown | 1 | unknown | male   |                      | 45,X/46,XY mosaicism          | 0.6732    | 0.7016    |
| 10 | male   | male   | female  | 1 | female  | male   | Klinefelter Syndrome | Klinefelter Syndrome (47,XXY) | -0.03886  | -0.02651  |
| 11 | female | male   | male    | 1 | male    | male   |                      | No abnormality                | 1         | 1         |
| 12 | male   | male   | unknown | 1 | female  | male   |                      | Klinefelter Syndrome (47,XXY) | 0.3093    | 0.2872    |
| 13 | male   | female | male    |   | male    | male   |                      | 45,X/46,XY mosaicism          | 1         | 0.9603    |
| 14 | female | female | male    | 1 | male    | female | Turner Syndrome      | Turner Syndrome (45,X)        | 0.9273    | 0.9527    |
| 15 | female | female | unknown |   | female  | female |                      | Low heterozygosity on chrX    | 0.4004    | 0.3584    |
| 16 | female | female | unknown | 1 | unknown | female |                      | Low heterozygosity on chrX    | 0.3838    | 0.4362    |
| 17 | male   | male   | unknown |   | male    | male   |                      | 45,X/46,XY mosaicism          | 0.7707    | 0.8358    |
| 18 | female | female | unknown |   | female  | female |                      | Low heterozygosity on chrX    | 0.3978    | 0.3886    |
| 19 | female | female | unknown | 1 | unknown | female |                      | Low heterozygosity on chrX    | 0.7748    | 0.7842    |
| 20 | female | female | unknown |   | female  | female |                      | No abnormality                | 0.3298    | 0.3527    |
| 21 | male   | male   | unknown | 1 | unknown | male   |                      | 45,X/46,XY mosaicism          | 0.6658    | 0.7601    |
| 22 | male   | female | male    |   | male    | male   |                      | 45,X/46,XY mosaicism          | 1         | 0.9827    |
| 23 | female | female | unknown | 1 | unknown | female |                      | 45,X/46,XX mosaicism          | 0.4148    | 0.4228    |
| 24 | male   | female | female  | 1 | female  | female |                      | No abnormality                | -0.003668 | -0.01753  |
| 25 | female | female | unknown |   | female  | female |                      | Low heterozygosity on chrX    | 0.3489    | 0.2975    |
| 26 | female | male   | male    | 1 | male    | male   |                      | No abnormality                | 1         | 1         |
| 27 | male   | female | female  | 1 | female  | female |                      | No abnormality                | -0.02345  | -0.01932  |
| 28 | male   | male   | female  | 1 | female  | male   | Klinefelter Syndrome | Klinefelter Syndrome (47,XXY) | -0.03581  | -0.02924  |
| 29 | female | female | unknown | 1 | unknown | female |                      | 45,X/46,XX mosaicism          | 0.5139    | 0.5022    |
| 30 | female | female | unknown |   | female  | female |                      | Low heterozygosity on chrX    | 0.3461    | 0.3336    |
| 31 | male   | female | female  | 1 | female  | female |                      | No abnormality                | 0.01936   | -0.006017 |
| 32 | male   | female | female  | 1 | female  | female |                      | No abnormality                | -0.04206  | -0.0411   |
| 33 | female | male   | male    | 1 | male    | male   |                      | No abnormality                | 1         | 1         |
| 34 | male   | female | male    |   | male    | male   |                      | 45,X/46,XY mosaicism          | 0.9756    | 0.9832    |

1  
2  
3  
4  
5  
6  
7  
8  
9  
10  
11  
12  
13  
14  
15  
16  
17  
18  
19  
20  
21  
22  
23  
24  
25  
26  
27  
28  
29  
30  
31  
32  
33  
34  
35  
36  
37  
38  
39  
40  
41  
42  
43  
44  
45  
46  
47

|      |      |         |   |         |      |                      |      |        |
|------|------|---------|---|---------|------|----------------------|------|--------|
| male | male | unknown | 1 | unknown | male | 45,X/46,XY mosaicism | 0.72 | 0.7971 |
|------|------|---------|---|---------|------|----------------------|------|--------|

For peer review only

1  
2  
3  
4  
5  
6  
7  
8  
9  
10  
11  
12  
13  
14  
15  
16  
17  
18  
19  
20  
21  
22  
23  
24  
25  
26  
27  
28  
29  
30  
31  
32  
33  
34  
35  
36  
37  
38  
39  
40  
41  
42  
43  
44  
45  
46  
47

**Supplementary Table S2: Self-reported ancestry and derived category from cultural and racial background**

| Self-reported Ancestry | Category        |
|------------------------|-----------------|
| Arab                   | Arab            |
| West Asian             | Arab            |
| Black                  | Black           |
| Chinese                | East Asian      |
| Japanese               | East Asian      |
| Korean                 | East Asian      |
| Latin American         | Latino          |
| Don't know             | Other           |
| Mixed                  | Mixed           |
| Other                  | Other           |
| Refused                | Other           |
| South Asian            | South Asian     |
| Filipino               | Southeast Asian |
| Southeast Asian        | Southeast Asian |
| White                  | White           |

For peer review only

**Supplementary Table S3:** Comparison of HLA types in positive controls with known types in literature

| HLA locus | NA10859<br>(1347-02) <sup>a</sup><br>Reference<br>Genotype | NA10859<br>(1347-02)<br>No of<br>replicates | NA10859<br>(1347-02)<br>Accuracy(%)/<br>Call rate(%) <sup>d</sup> | NA12878 (1463-02)<br>Reference Genotype          | NA12878<br>(1463-02)<br>No of<br>replicates | NA12878<br>(1463-02)<br>Accuracy(%)/<br>Call rate(%) | NA24385 (HG002<br>(NIST RM 8391))<br>Reference<br>Genotype | NA24385 (HG002<br>(NIST RM 8391))<br>No of replicates | NA24385 (HG002<br>(NIST RM 8391))<br>Accuracy(%)/<br>Call rate(%) |
|-----------|------------------------------------------------------------|---------------------------------------------|-------------------------------------------------------------------|--------------------------------------------------|---------------------------------------------|------------------------------------------------------|------------------------------------------------------------|-------------------------------------------------------|-------------------------------------------------------------------|
| A         | 03:01/01:01 <sup>b</sup>                                   | 4                                           | 100/100                                                           | 01:01/11:01 <sup>e</sup>                         | 587                                         | 100/100                                              | 26:01/01:01 <sup>f</sup>                                   | 75                                                    | 100/100                                                           |
| B         | 07:02/15:01 <sup>b</sup>                                   | 4                                           | 100/100                                                           | 08:01/56:01 <sup>e</sup>                         | 587                                         | 100/100                                              | 38:01/35:08 <sup>f</sup>                                   | 75                                                    | -                                                                 |
| C         | 06:02/07:02 <sup>b</sup>                                   | 4                                           | 100/100                                                           | 01:02/07:01 <sup>e</sup>                         | 587                                         | 100/100                                              | 12:03/04:01 <sup>f</sup>                                   | 75                                                    | 100/100                                                           |
| DPA1      | 01:03/01:03 <sup>b</sup>                                   | 4                                           | 100/100                                                           | 01:03/02:01 <sup>e</sup>                         | 587                                         | 100/100                                              | 01:03/01:03 <sup>f</sup>                                   | 75                                                    | 100/100                                                           |
| DPB1      | 04:02/04:02 <sup>b</sup>                                   | 4                                           | 100/100                                                           | 04:01/14:01 <sup>e</sup>                         | 587                                         | 100/100                                              | 04:01/04:01 <sup>g</sup>                                   | 75                                                    | 100/100                                                           |
| DQA1      | 01:02/03:01 <sup>b</sup>                                   | 4                                           | 100/100                                                           | 01:01/05:01 <sup>e</sup>                         | 587                                         | 100/100                                              | 03:01/01:01 <sup>h</sup>                                   | 75                                                    | 100/100                                                           |
| DQB1      | 03:02/06:02 <sup>b</sup>                                   | 4                                           | 100/100                                                           | 02:01/05:01 <sup>e</sup>                         | 587                                         | 100/100                                              | 05:01/03:02 <sup>f</sup>                                   | 75                                                    | 100/100                                                           |
| DRB1      | 04:01/15:01 <sup>b</sup>                                   | 4                                           | 100/100                                                           | 01:01/03:01 <sup>e</sup>                         | 587                                         | 100/100                                              | 04:02/10:01 <sup>f</sup>                                   | 75                                                    | 100/100                                                           |
| DRB3      | NA <sup>b,c</sup>                                          | 4                                           | -                                                                 | 01:01/01:01;01:01/02:02 <sup>e</sup>             | 587                                         | 100/100                                              | NA <sup>f</sup>                                            | 75                                                    | -                                                                 |
| DRB4      | 01 <sup>b</sup>                                            | 4                                           | 100/100                                                           | 01:01/01:01;01:03/01:03;01:06/01:06 <sup>e</sup> | 587                                         | -                                                    | 01:03 <sup>f</sup>                                         | 75                                                    | 100/100                                                           |
| DRB5      | NA <sup>b,c</sup>                                          | 4                                           | -                                                                 | NA <sup>e</sup>                                  | 587                                         | -                                                    | NA <sup>f</sup>                                            | 75                                                    | -                                                                 |

Note: a-Coriell ID (CEPH Family ID or NIST ID/RM Number for Personal Genome Project sample)

b: reference genotype source-IPD-IMGT/HLA Database

c: reference genotype data is not available

d: call rate is based on a posterior probability call threshold of 0.7

e: reference genotype source-PLoS Comput Biol. 2016 Oct; 12(10): e1005151. PMID: 27792722. A set of possible alleles are reported in the reference. The HLA types we validated are shown in the table.

f: reference genotype source-DOI: 10.12688/f1000research.19630.1

g: reference genotype source-DOI: 10.12688/f1000research.19630.1 and <https://www.pacb.com/wp-content/uploads/Rowell-CSHLBioData-2018-Comprehensive-Variant-Detection-in-a-Human-Genome-with-PacBio-High-Fidelity-Reads.pdf>. The HLA types we validated are shown in the table.

h: reference genotype source-DOI: 10.12688/f1000research.19630.1 and Nature Communications doi: 10.1038/s41467-020-18564-9. The HLA types we validated are shown in the table.

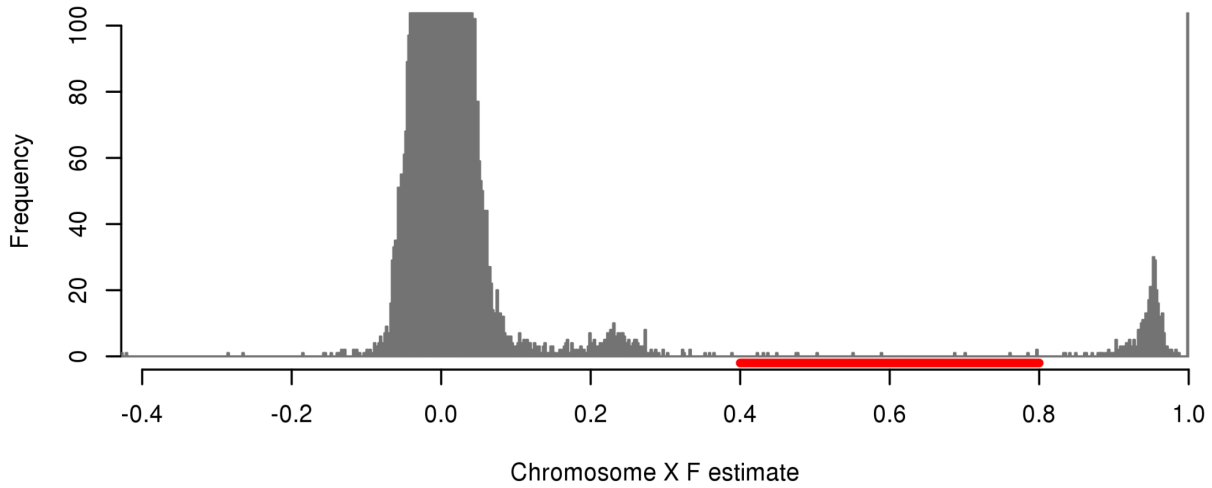

**Supplementary Figure S1:** Distribution of chromosome X F estimates for CLSA genotyped participants (y-axis truncated). Individuals with chromosome X F estimates within the range of 0.4 to 0.8 (red) are considered to have undefined chromosomal sex.



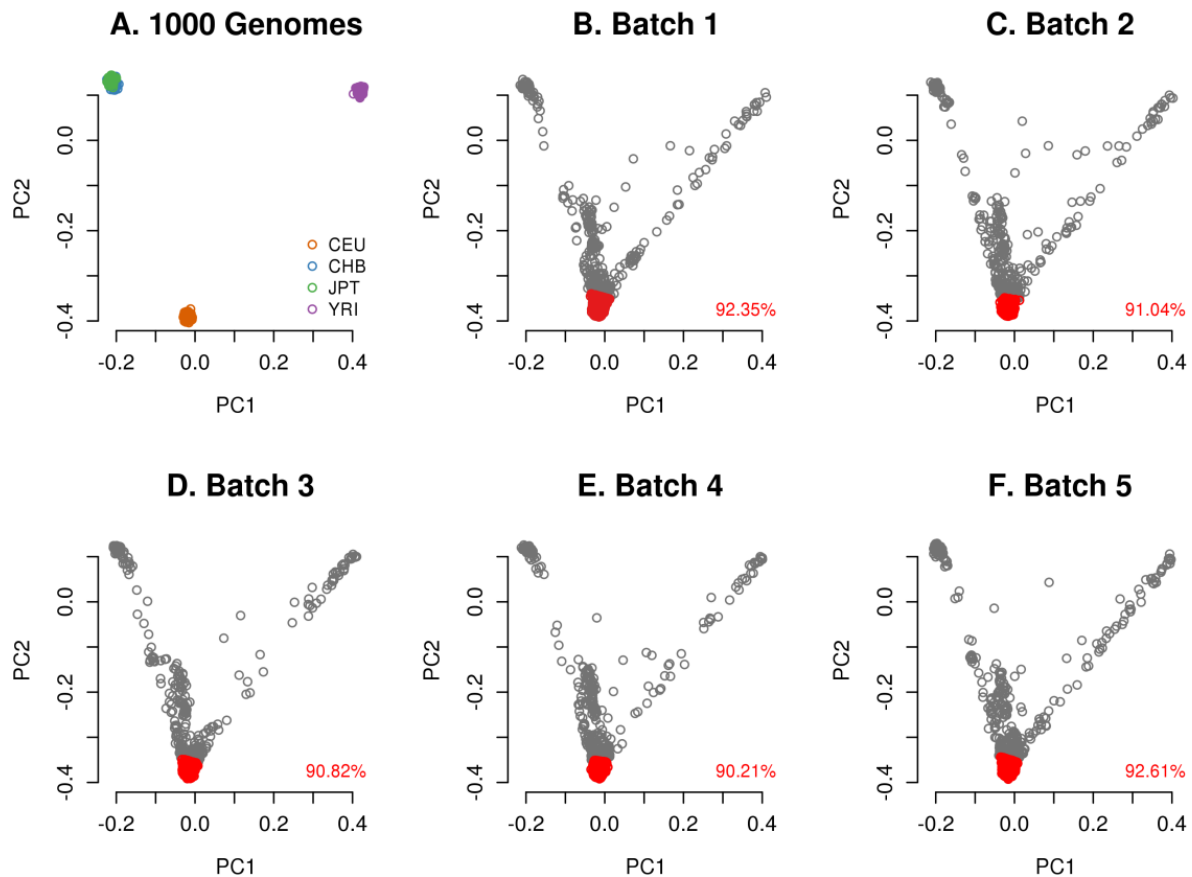

**Supplementary Figure S2:** Principal component (PC) plots. (A) Plot of first 2 PC for the analyzed populations from 1000 Genomes. (B-F) Projection of CLSA participants onto 1000 Genomes PC plot for genotype batch 1 to 5 followed by k-means clustering of PC1-4 (grey points). The largest cluster overlaps the 1000 Genomes CEU population (red points and percentage of total in batch is provided).

1  
2  
3  
4  
5  
6  
7  
8  
9  
10  
11  
12  
13  
14  
15  
16  
17  
18  
19  
20  
21  
22  
23  
24  
25  
26  
27  
28  
29  
30  
31  
32  
33  
34  
35  
36  
37  
38  
39  
40  
41  
42  
43  
44  
45  
46  
47  
48  
49  
50  
51  
52  
53  
54  
55  
56  
57  
58  
59  
60

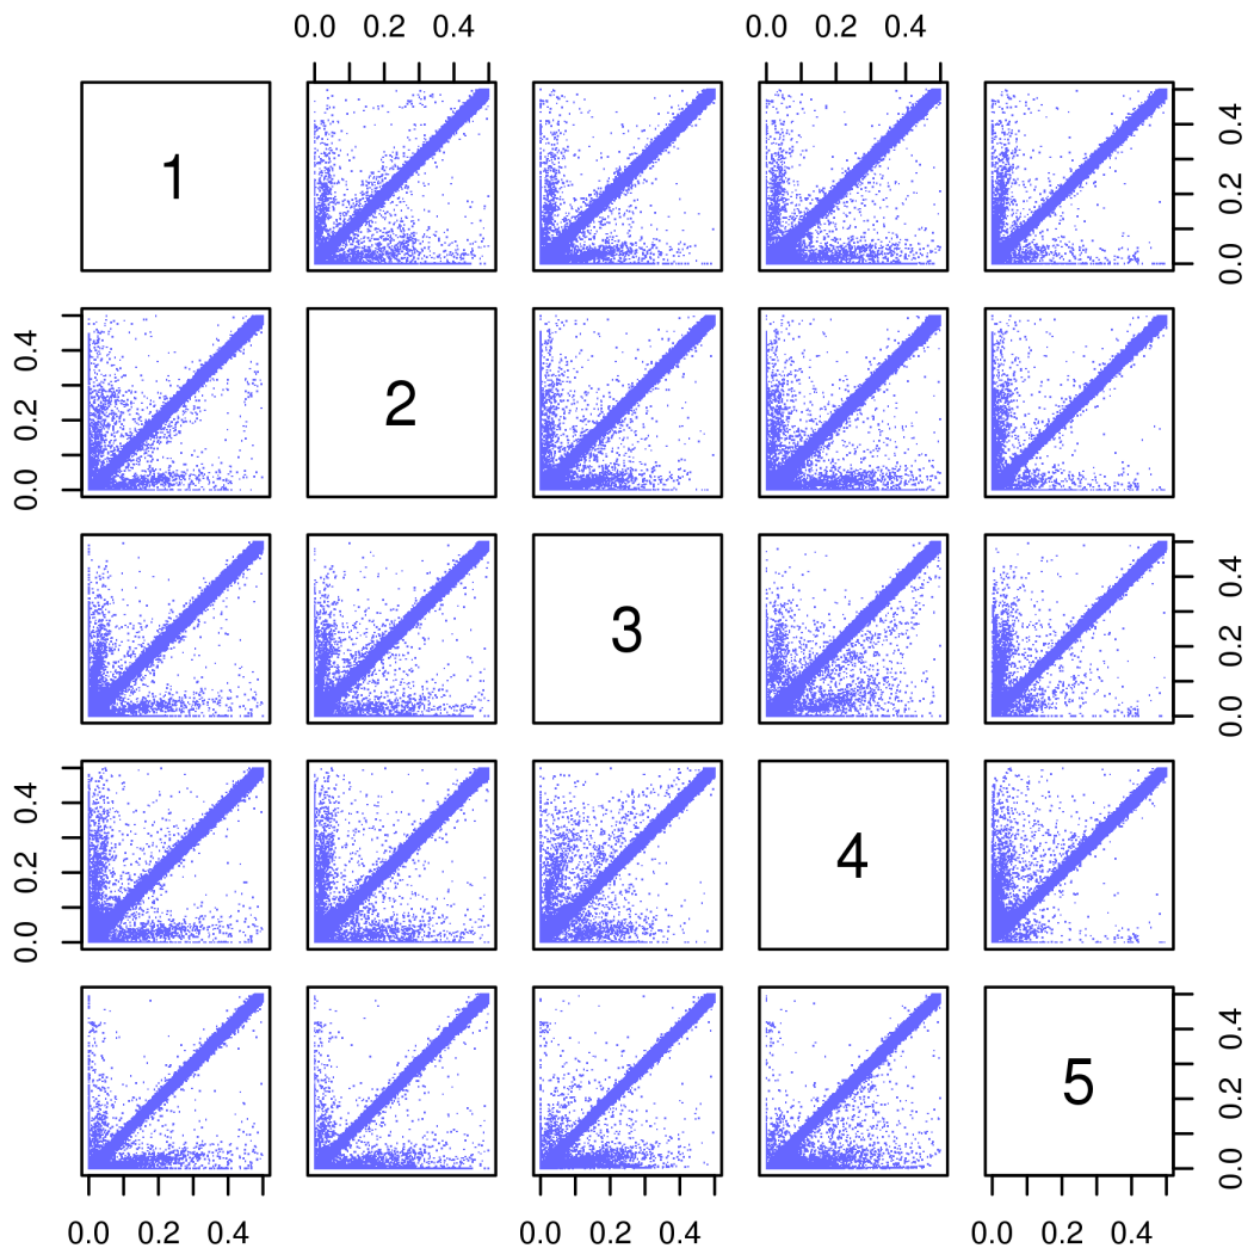

**Supplementary Figure S3:** Pairwise plot of allele frequency of SNPs from genotype batch 1 to 5.

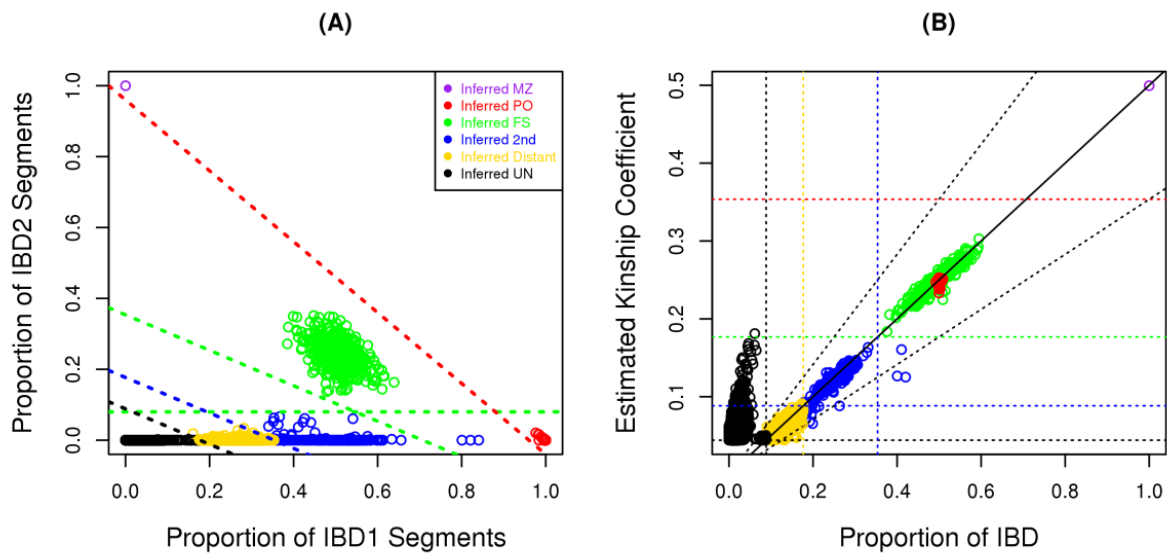

**Supplementary Figure S4:** Inference of familial relatedness using KING.

(A) Inference using IBD segments. (B) Inference using proportion IBD and kinship coefficient.

Relationships in legend are abbreviated as: MZ=Monozygotic twin, PO=Parent/offspring, FS=Full sibling, 2nd=Second-degree relative, 3rd=Third-degree relative, Distant=Greater than 3rd degree relative, UN=Unrelated. Limits for inferring relationship type are indicated by dashed lines that are color-coded to match those listed in the legend.

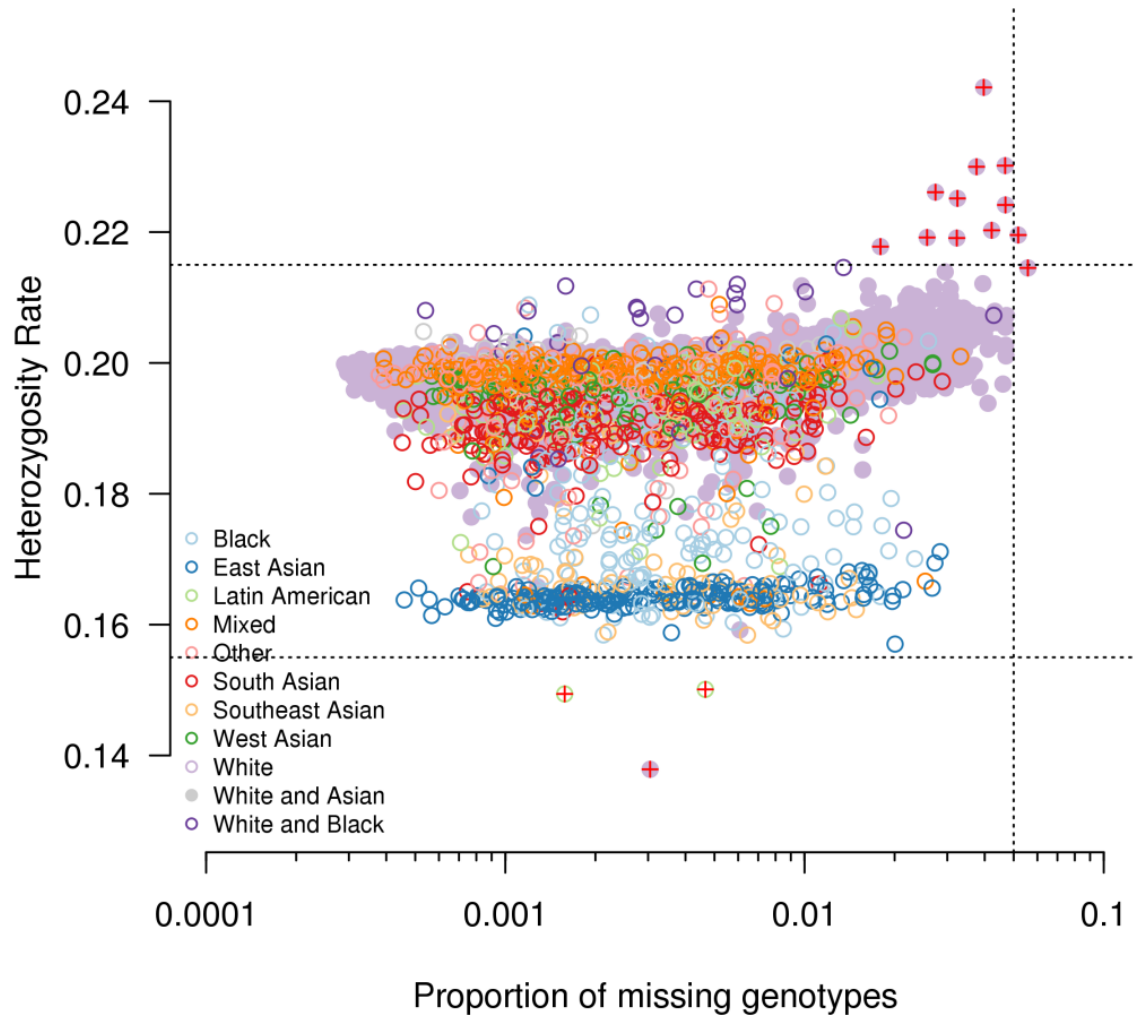

**Supplementary Figure S5:** Sample-wise heterozygosity versus genotype missingness. Points are color coded according to self-reported ancestry category. Outliers are marked with a red plus sign.

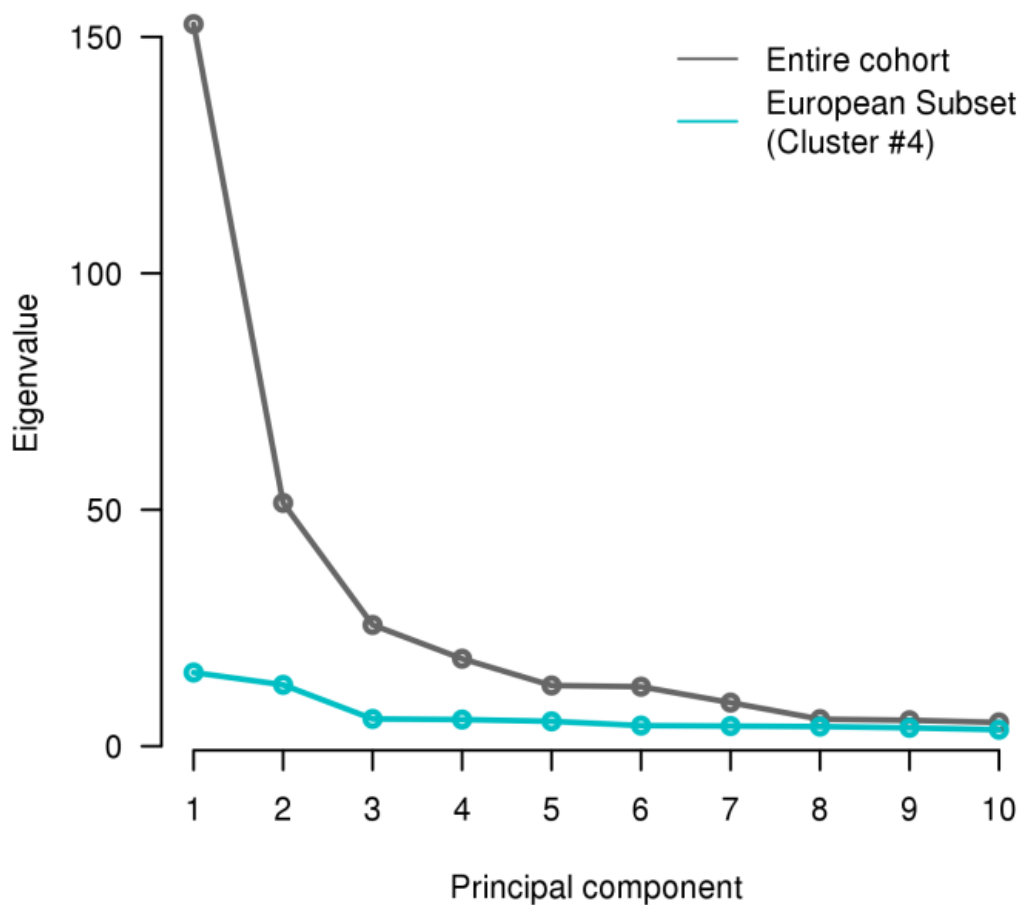

**Supplementary Figure S6:** Eigenvalues for PCA analysis of the entire cohort (grey) and the European ancestry subset (cluster 4, Robin egg blue), demonstrating a reduction in genetic variance within the European ancestry subset.

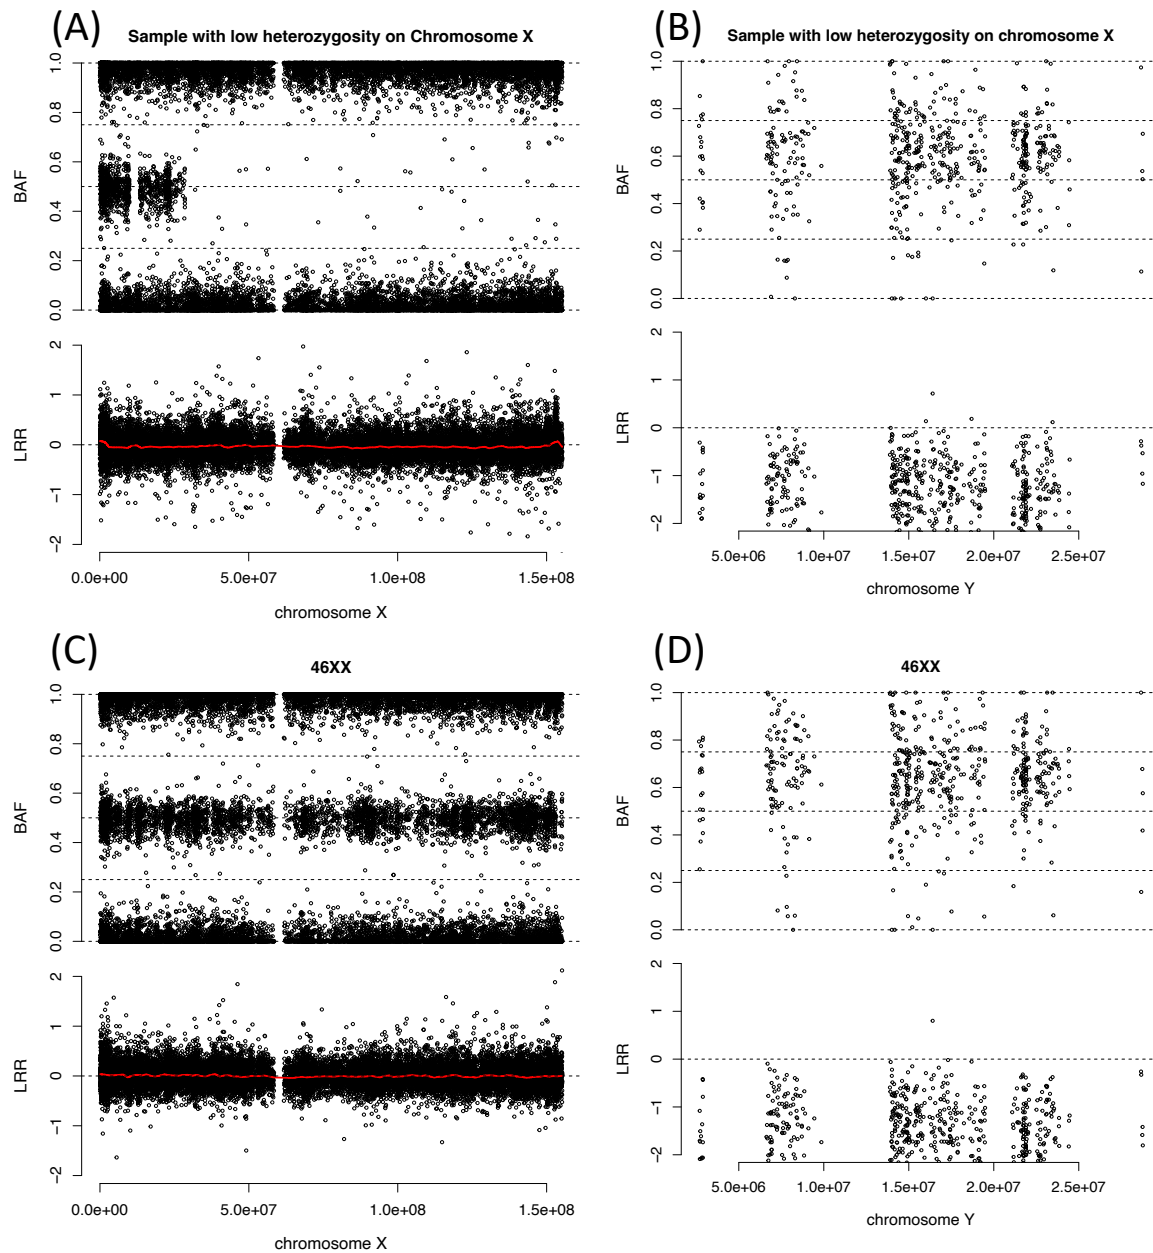

**Supplementary Figure S7:** BAF (TOP) and log<sub>2</sub> ratio (BOTTOM) of chromosomes X (A) and Y (B) are shown for sample with low heterozygosity on chromosome X compared to sample with 46,XX (C-D).

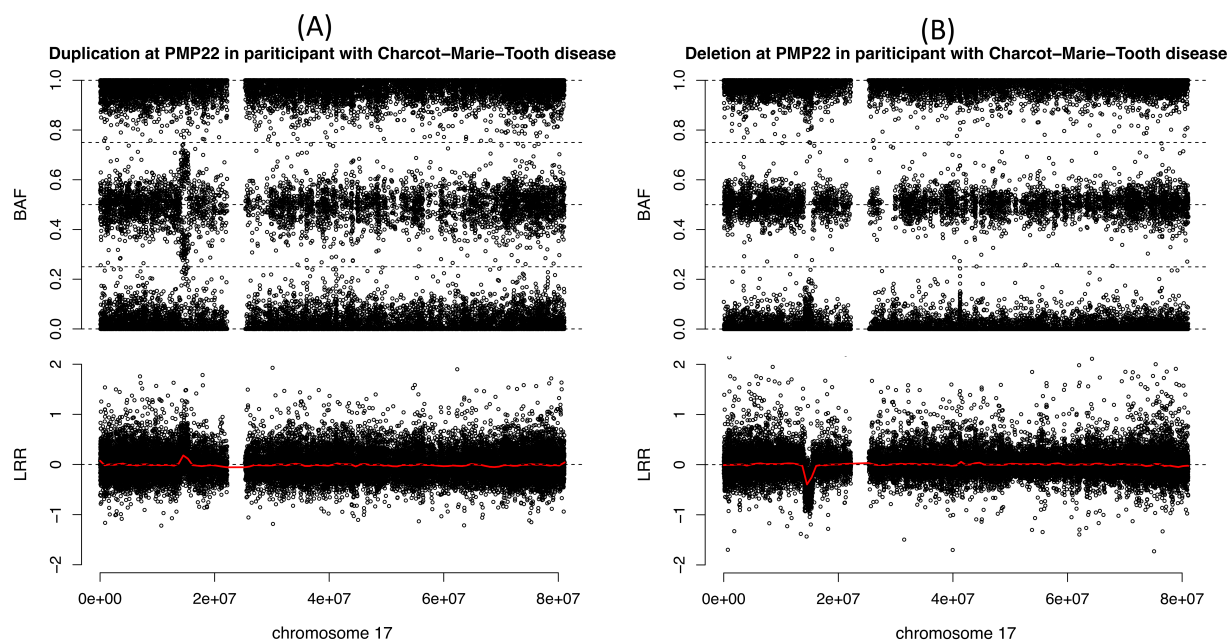

26 **Supplementary Figure S8:** BAF (TOP) and log<sub>2</sub> ratio (BOTTOM) of chromosome 17 are shown for  
27 sample with duplication (A) or deletion (B) at *PMP22* locus.  
28  
29

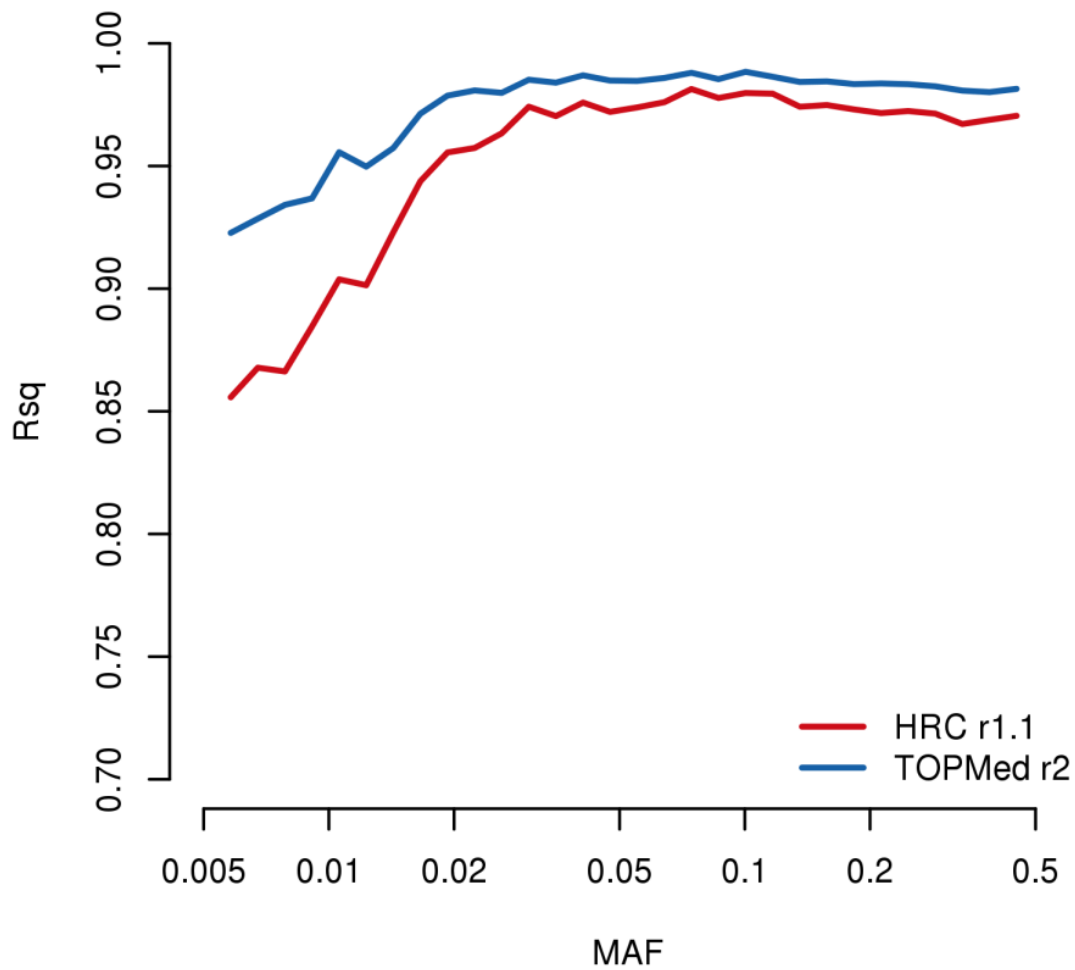

**Supplementary Figure S9:** Imputation quality of the CLSA cohort using the TOPMed versus Haplotype Reference Consortium (HRC) reference panel stratified by minor allele frequency (MAF) bins (data shown is from chromosome 22).
