# Supplementary material for: Cohort profile: genomic data for 26 622 individuals from the Canadian Longitudinal Study on Aging (CLSA)
Source: HighWire-hosted journal article supplement (doi:10.1136/bmjopen-2021-059021), 2022-03-01
Supplement: bmjopen-2021-059021supp002_data_supplement.pdf [file bmjopen-2021-059021supp002_data_supplement.pdf]

**Supplementary Table S2:** Self-reported ancestry and derived category from cultural and racial background

| Self-reported Ancestry | Category        |
|------------------------|-----------------|
| Arab                   | Arab            |
| West Asian             | Arab            |
| Black                  | Black           |
| Chinese                | East Asian      |
| Japanese               | East Asian      |
| Korean                 | East Asian      |
| Latin American         | Latino          |
| Don't know             | Other           |
| Mixed                  | Mixed           |
| Other                  | Other           |
| Refused                | Other           |
| South Asian            | South Asian     |
| Filipino               | Southeast Asian |
| Southeast Asian        | Southeast Asian |
| White                  | White           |
